# Supplementary material for: MAGDALENA: study protocol of a randomised, placebo-controlled trial on cognitive development at 2 years of age in children exposed to SSRI in utero
Source: PubMed Central journal article supplement — BMJ Open. 2018 Aug 5;8(8):e023281. doi: 10.1136/bmjopen-2018-023281 (PMC6078226; doi:10.1136/bmjopen-2018-023281), 2018-08-05
Supplement: bmjopen-2018-023281.draft_revisions.pdf [file bmjopen-2018-023281.draft_revisions.pdf]

# BMJ Open

BMJ Open is committed to open peer review. As part of this commitment we make the peer review history of every article we publish publicly available.

When an article is published we post the peer reviewers' comments and the authors' responses online. We also post the versions of the paper that were used during peer review. These are the versions that the peer review comments apply to.

The versions of the paper that follow are the versions that were submitted during the peer review process. They are not the versions of record or the final published versions. They should not be cited or distributed as the published version of this manuscript.

BMJ Open is an open access journal and the full, final, typeset and author-corrected version of record of the manuscript is available on our site with no access controls, subscription charges or pay-per-view fees (<http://bmjopen.bmj.com>).

If you have any questions on BMJ Open's open peer review process please email [info.bmjopen@bmj.com](mailto:info.bmjopen@bmj.com)

# BMJ Open

## MAGDALENA: Study protocol of a randomised, placebo-controlled trial on cognitive development at two years of age in children exposed to SSRI in utero.

|                               |                                                                                                                                                                                                                                                                                                                                                                                                                                                                                                                                                                                                                                                                                                                                                                                                                                                                                                                                                                                                                                                                                                                                                                                                                                                                                                                                                                                                                                                                                                                                                                                                                                                                                                                                                                                                                                                                                                                                                                                                                                                                                                                                                             |
|-------------------------------|-------------------------------------------------------------------------------------------------------------------------------------------------------------------------------------------------------------------------------------------------------------------------------------------------------------------------------------------------------------------------------------------------------------------------------------------------------------------------------------------------------------------------------------------------------------------------------------------------------------------------------------------------------------------------------------------------------------------------------------------------------------------------------------------------------------------------------------------------------------------------------------------------------------------------------------------------------------------------------------------------------------------------------------------------------------------------------------------------------------------------------------------------------------------------------------------------------------------------------------------------------------------------------------------------------------------------------------------------------------------------------------------------------------------------------------------------------------------------------------------------------------------------------------------------------------------------------------------------------------------------------------------------------------------------------------------------------------------------------------------------------------------------------------------------------------------------------------------------------------------------------------------------------------------------------------------------------------------------------------------------------------------------------------------------------------------------------------------------------------------------------------------------------------|
| Journal:                      | <i>BMJ Open</i>                                                                                                                                                                                                                                                                                                                                                                                                                                                                                                                                                                                                                                                                                                                                                                                                                                                                                                                                                                                                                                                                                                                                                                                                                                                                                                                                                                                                                                                                                                                                                                                                                                                                                                                                                                                                                                                                                                                                                                                                                                                                                                                                             |
| Manuscript ID                 | bmjopen-2018-023281                                                                                                                                                                                                                                                                                                                                                                                                                                                                                                                                                                                                                                                                                                                                                                                                                                                                                                                                                                                                                                                                                                                                                                                                                                                                                                                                                                                                                                                                                                                                                                                                                                                                                                                                                                                                                                                                                                                                                                                                                                                                                                                                         |
| Article Type:                 | Protocol                                                                                                                                                                                                                                                                                                                                                                                                                                                                                                                                                                                                                                                                                                                                                                                                                                                                                                                                                                                                                                                                                                                                                                                                                                                                                                                                                                                                                                                                                                                                                                                                                                                                                                                                                                                                                                                                                                                                                                                                                                                                                                                                                    |
| Date Submitted by the Author: | 29-Mar-2018                                                                                                                                                                                                                                                                                                                                                                                                                                                                                                                                                                                                                                                                                                                                                                                                                                                                                                                                                                                                                                                                                                                                                                                                                                                                                                                                                                                                                                                                                                                                                                                                                                                                                                                                                                                                                                                                                                                                                                                                                                                                                                                                                 |
| Complete List of Authors:     | <p>Heinonen, Essi; Karolinska institutet Department of Clinical Sciences Intervention and Technology, Pediatrics; Karolinska Universitetssjukhuset, Paediatrics</p> <p>Szymanska - von Schultz, Barbara; Karolinska Institutet, Department of Clinical Science, Intervention and Technology, Division of Obstetrics and Gynaecology, ; Karolinska Universitetssjukhuset, Obstetrics and Gynaecology</p> <p>Kaldo, V; Karolinska Institutet,</p> <p>Nasiell, Josefine; Karolinska Institutet, Department of Clinical Science, Intervention and Technology, Division of Obstetrics and Gynaecology; Karolinska Universitetssjukhuset, Obstetrics and Gynaecology</p> <p>Andersson, Ewa; Karolinska Institutet, Department of Women 's and Children 's Health</p> <p>Bergmark, Mikaela; Stockholm Healthcare Region, Psychiatry South West</p> <p>Blomdahl-Wetterholm, Margareta; Stockholm Healthcare Region, Psychiatry South West</p> <p>Forsberg, Lisa; Karolinska institutet Department of Clinical Sciences Intervention and Technology, Pediatrics; Karolinska Universitetssjukhuset, Paediatrics</p> <p>Forsell, Erik; Karolinska Institutet Department of Clinical Neuroscience, Centre for Psychiatry Research; Stockholm Healthcare Region, Psychiatry South West</p> <p>Forsgren, Anna; Karolinska institutet Department of Clinical Sciences Intervention and Technology, Pediatrics</p> <p>Fröjd, Sandra; Stockholm Healthcare Region, Psychiatry South West</p> <p>Goldman, Amy; Stockholm Healthcare Region, Psychiatry South West</p> <p>Nordenadler, Eva-Marie; Stockholm Healthcare Region, Psychiatry South West</p> <p>Sklivanioti, Myrto; Stockholm Healthcare Region, Psychiatry South West</p> <p>Blennow, Mats; Karolinska Institutet, Department of Clinical Science, Intervention and Technology; Karolinska Universitetssjukhuset, Paediatrics</p> <p>Wide, Katarina; Karolinska Institutet, Department of Clinical Science, Intervention and Technology, Division of Paediatrics; Karolinska Universitetssjukhuset, Paediatrics</p> <p>Gustafsson, Lars; Division of Clinical Pharmacology, Department of Laboratory medicine</p> |
| Keywords:                     | Antenatal depression, Internet-Based Cognitive Behaviour Therapy, Serotonin Reuptake Inhibitors, Neurodevelopment, Pregnancy, Drug Metabolism                                                                                                                                                                                                                                                                                                                                                                                                                                                                                                                                                                                                                                                                                                                                                                                                                                                                                                                                                                                                                                                                                                                                                                                                                                                                                                                                                                                                                                                                                                                                                                                                                                                                                                                                                                                                                                                                                                                                                                                                               |

1  
2  
3  
4  
5  
6  
7  
8  
9  
10  
11  
12  
13  
14  
15  
16  
17  
18  
19  
20  
21  
22  
23  
24  
25  
26  
27  
28  
29  
30  
31  
32  
33  
34  
35  
36  
37  
38  
39  
40  
41  
42  
43  
44  
45  
46  
47  
48  
49  
50  
51  
52  
53  
54  
55  
56  
57  
58  
59  
60

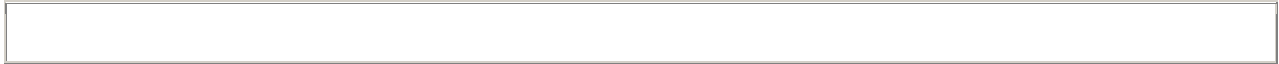

SCHOLARONE™  
Manuscripts

For peer review only

# MAGDALENA: Study protocol of a randomised, placebo-controlled trial on cognitive development at two years of age in children exposed to SSRI in utero.

**Heinonen E**<sup>1,2</sup> [essi.heinonen@ki.se](mailto:essi.heinonen@ki.se), **Szymanska-von Schultz B**<sup>3,4</sup> [barbara.szymanska-vonschultz@sll.se](mailto:barbara.szymanska-vonschultz@sll.se), **Kaldo V**<sup>5-7</sup> [viktor.kaldo@ki.se](mailto:viktor.kaldo@ki.se), **Nasiell J**<sup>3,4</sup> [josefine.nasiell@ki.se](mailto:josefine.nasiell@ki.se), **Andersson E**<sup>8</sup> [ewa.andersson@ki.se](mailto:ewa.andersson@ki.se), **Bergmark M**<sup>6</sup> [mikaelabergmark@gmail.com](mailto:mikaelabergmark@gmail.com), **Blomdahl-Wetterholm M**<sup>6</sup> [margareta.blomdahl-wetterholm@sll.se](mailto:margareta.blomdahl-wetterholm@sll.se), **Forsberg L**<sup>1,2</sup> [lisa.forsberg.l@ki.se](mailto:lisa.forsberg.l@ki.se), **Forsell E**<sup>5,6</sup> [erik.forsell@ki.se](mailto:erik.forsell@ki.se), **Forsgren A**<sup>1</sup> [anna.forsgren@ki.se](mailto:anna.forsgren@ki.se), **Frööjd S**<sup>6</sup> [sandra.froojd@gmail.com](mailto:sandra.froojd@gmail.com), **Goldman A**<sup>6</sup> [amy.goldman@sll.se](mailto:amy.goldman@sll.se), **Nordenadler EM**<sup>6</sup> [eva-marie.nordenadler@sll.se](mailto:eva-marie.nordenadler@sll.se), **Sklivanioti M**<sup>6</sup> [myrto.sklivanioti@sll.se](mailto:myrto.sklivanioti@sll.se), **Blennow M**<sup>1,2</sup> [mats.blennow@ki.se](mailto:mats.blennow@ki.se), **Wide K**<sup>1,2</sup> [katarina.wide@ki.se](mailto:katarina.wide@ki.se), **Gustafsson LL**<sup>9,10</sup> [lars-l.gustafsson@ki.se](mailto:lars-l.gustafsson@ki.se)

**Division of Paediatrics, Department of Clinical Science, Intervention and Technology (CLINTEC), Karolinska Institutet, Stockholm<sup>1</sup>, Department of Paediatrics at Karolinska University Hospital, Stockholm<sup>2</sup>, Division of Obstetrics and Gynaecology, Department of Clinical Science, Intervention and Technology (CLINTEC), Karolinska Institutet, Stockholm<sup>3</sup>, Department of Obstetrics and Gynaecology at Karolinska University Hospital, Stockholm<sup>4</sup>, Centre for Psychiatry Research, Department of Clinical Neuroscience, Karolinska Institutet, Stockholm<sup>5</sup>, Psychiatry South West, Stockholm Health Care Region<sup>6</sup>, Department of Psychology, Faculty of Health and Life Sciences, Linnaeus University, Växjö<sup>7</sup>, Department of Women's and Children's Health, Karolinska Institutet, Stockholm<sup>8</sup>, Division of Clinical Pharmacology, Department of Laboratory Medicine, Karolinska Institutet, Stockholm<sup>9</sup>, Department of Clinical Pharmacology, Karolinska University Hospital, Stockholm<sup>10</sup>.**

**Corresponding author:** Essi Heinonen, Division of Paediatrics, Department of Clinical Science, Intervention and Technology (CLINTEC), Karolinska Institutet, Stockholm. Blickagången 6A, 14157 Huddinge, Sweden. [essi.heinonen@ki.se](mailto:essi.heinonen@ki.se), +4673-563 3330.

**Sponsor:** Mats Blennow, Division of Paediatrics, Department of Clinical Science, Intervention and Technology (CLINTEC), Karolinska Institutet, Stockholm. Blickagången 6A, 14157 Huddinge, Sweden. [mats.blennow@ki.se](mailto:mats.blennow@ki.se), +4670-003 8906

## ABSTRACT

### Introduction

Ten percent of all pregnant women are depressed. Standard management of pregnant women with moderate depression is treatment with Selective Serotonin Reuptake Inhibitors (SSRI). Previous observational studies on neurodevelopment after fetal SSRI exposure show conflicting results. Our primary objective is to compare the cognitive development in children exposed to sertraline and maternal depression with those exposed to maternal depression and

1  
2  
3 placebo in fetal life. Our hypothesis is that there are no significant neurodevelopmental  
4 differences between the groups. As a secondary objective we will study the add-on effect of  
5 sertraline to Internet-based Cognitive Behaviour Therapy (ICBT) in treatment of moderate  
6 depression during pregnancy.  
7

## 8 **Methods and analysis**

9

10 MAGDALENA is a randomised, placebo-controlled, double-blinded trial in the Stockholm  
11 Healthcare region with 2.3 million inhabitants. The women are recruited in week 9-21 of  
12 pregnancy either through Antenatal Health Clinics or through social media. They are to be  
13 diagnosed with moderate depression and have no ongoing antidepressive therapy or any  
14 serious comorbidity to be included. The women in the intervention arm receive sertraline  
15 combined with a twelve-week period of ICBT, whereas the control arm is treated with  
16 placebo and ICBT. Our primary outcome is the cognitive development in the offspring at the  
17 age of 2, assessed with Bayley Scales of Infant and Toddler Development<sup>®</sup>, 3<sup>rd</sup> edition  
18 (BSID-III<sup>®</sup>). We aim at recruiting 200 women, 100 women in each treatment arm, to ensure  
19 statistical power to detect a clinically relevant difference between the groups.  
20  
21

## 22 **Ethics and dissemination**

23

24 This randomised trial will provide long sought evidence about the effects of SSRI and  
25 maternal depression during pregnancy on the neurodevelopment in the offspring. Full ethical  
26 approvals have been obtained. Results will be disseminated at scientific conferences,  
27 published in peer-reviewed journals, and made available to the public in different ways  
28 including social media.  
29  
30

31  
32  
33 **Key Words:** Antenatal depression, Drug metabolism, Infant, Internet-based Cognitive  
34 behaviour therapy, Neurodevelopment, Pregnancy, Randomised controlled trial, Serotonin  
35 Reuptake Inhibitors,  
36  
37  
38  
39

## 40 **Article Summary**

41

### 42 **Strengths and limitations of this study**

43

44 + To our knowledge, this is the first randomised trial to separate the neurodevelopmental  
45 effects of fetal SSRI exposure from the possible effects from the underlying maternal  
46 depression.  
47

48  
49 + The study will provide evidence for the add-on effect of SSRIs to ICBT for treatment of  
50 moderate depression during pregnancy.  
51

52 - We may risk a limited generalizability of our findings due to strict inclusion and exclusion  
53 criteria.  
54  
55  
56  
57  
58  
59

1  
2  
3 - There is a risk for loss to follow-up due to our long follow-up period. This risk would be  
4 similar between groups because of our randomised design.  
5  
6  
7

8 **Word Count:** 4730 words (Excluding title page, abstract, figures, tables, declarations and  
9 references.) Abstract 294 words.  
10  
11  
12

## 13 **Introduction**

### 14 **Background**

15  
16  
17 Although approximately ten percent of pregnant women are depressed, the prescription-rate  
18 of antidepressants decreases during pregnancy as compared to the preceding months<sup>1,2,3</sup>  
19 Untreated prenatal depression is associated with pregnancy complications such as  
20 preeclampsia<sup>4</sup>, low birth weight and prematurity<sup>5</sup> and increased plasma levels of stress  
21 hormones in the pregnant woman and the neonate.<sup>6,7</sup> Currently, 2,4% of pregnant women in  
22 Sweden and 6% of the ones in USA are treated with SSRIs.<sup>8,9</sup> Increased risk for SSRI-related  
23 birth-defects has not been reported for most SSRIs except that fluoxetine and paroxetine seem  
24 to be associated with a small increase in the risk for heart defects.<sup>10</sup>  
25  
26  
27

28 The question if fetal SSRI exposure causes long-term neurodevelopmental effects remains  
29 unanswered.<sup>11</sup> Observational studies have reported a twofold increased risk for autism  
30 spectrum disorder (ASD),<sup>12-15</sup> but recently two large register studies explained this increase  
31 by confounding factors, emphasizing the role of genetic and social factors as opposed to drug  
32 exposure alone.<sup>16,17</sup> A recent review also concluded, that the increase was not significant  
33 when comparing to women with previous affective disease or in sibling studies.<sup>18</sup> To our  
34 knowledge, there is no previous randomised controlled trial in this field.  
35  
36

37 Our main objective is to clarify the cognitive effects on the children by pursuing a  
38 randomised, controlled, double blind study. We compare the cognitive development at two  
39 years of age in children to women with moderate depression during pregnancy, treated with  
40 either Internet-based Cognitive Behaviour therapy (ICBT) and sertraline (a SSRI compound)  
41 or ICBT and placebo. The Swedish acronym of the study, MAGDALENA, reflects this main  
42 objective: "*Maternal Affective Disease during Pregnancy: Depression and Antidepressant*  
43 *Drugs and Effects on the Neurological Development and Adaptation*".  
44  
45

46 Our secondary objective is to understand the add-on effect of sertraline to Internet-based  
47 Cognitive Behaviour Therapy (ICBT), a web-based self-treatment program with active  
48 therapist support over the internet. ICBT is a well-documented treatment for depression used  
49 in regular psychiatric care.<sup>19</sup> It has been shown that pregnant women feel that psychotherapy  
50 needs to take the special case of being pregnant into account to be credible and engaging.<sup>20</sup>  
51 Postpartum depression has been targeted in online trials<sup>20-23</sup>, but not antenatal depression.  
52 Because of this, we developed an ICBT program to be useful for treatment of antenatal  
53 depression based on the ICBT for depression used at our Internet Psychiatry Clinic. The  
54 modified ICBT was tested in a pilot RCT with good results. The effect size compared to  
55 regular maternity care was of clinical importance and significant, (Hedges  $g=1.21$ ,  $p<.001$ )<sup>24</sup>  
56 The Swedish guidelines state that mild and moderate depression should primarily be treated  
57  
58  
59  
60

with psychotherapy or antidepressants. Cognitive behaviour therapy and interpersonal therapy are recommended as the first choice of therapy. Severe depression should be treated with antidepressants or electroconvulsive therapy (ECT). The recommendation does not give guidance on the value of combination therapies for any level of depression.<sup>25</sup> Combination therapy with CBT and antidepressants appear more effective than antidepressant therapy alone in treatment of major depression,<sup>26</sup> but this has not been studied in pregnant women. Given the *in-utero* effects of untreated depression during pregnancy,<sup>7</sup> it might be rational with a dual treatment to achieve prompt symptom reduction. The effects of ICBT are comparable to the effects seen with traditional CBT, hence having the potential to be a cost-effective and accessible treatment alternative.<sup>19,24,27,28</sup> Our large group of patients and unique design with and without sertraline treatment allows us also to pursue exploratory tertiary studies in the pregnant women and in the newborns.<sup>29,30</sup>

## Objectives

### Primary and secondary objectives

Our primary objective is to study cognitive development at 2 years of age in children prenatally exposed to moderate maternal depression treated either with sertraline and ICBT (Intervention) or with ICBT and placebo (Control). Our hypothesis is that there is no significant neurodevelopmental differences between 2 year old children exposed to the intervention treatment as compared to the control treatment, measured with established scoring methods.

Our secondary objective is to evaluate the add-on effect of treatment with sertraline to an ICBT-program for antenatal depression. Our hypothesis is that sertraline provides a significant add-on effect to ICBT-therapy.

### Exploratory tertiary objectives

The large material and unique design with one SSRI-exposed and one placebo-treated arm allows exploratory studies on tertiary aspects related to physiological and adaptive changes in depressed pregnant women and in their newborns. We will study the risk of preeclampsia, bleeding and caesarean section and potential changes of biochemical parameters and hormones during the course of pregnancy in the two study groups.<sup>4,31-33</sup> Paediatric exploratory objectives include clarification of type and prevalence of signs and symptoms of neonatal maladaptation and risk of admission to a neonatal care unit. The design allows a subgroup study of maternal-fetal attachment and bonding style differences between the groups.<sup>34</sup>

We will explore interindividual variation in sertraline pharmacokinetics during and after pregnancy and in newborns and how it might relate to different genetic variants of drug metabolizing enzymes in pregnant women and newborns.<sup>35-37</sup> Likewise we will explore the epigenetic differences between the groups in mothers and newborns.<sup>38</sup>

## Methods and analysis

### Trial design and setting



1  
2  
3 The MAGDALENA Study is a prospective, randomised, placebo controlled, double blinded,  
4 single centred, clinical investigation of pregnant women with moderate depression recruited  
5 from the Stockholm catchment area (2.2 million inhabitants and 28000 deliveries annually)  
6 with multiple delivery units. The study group receives sertraline (or placebo) clinically  
7 titrated to a maximum daily dose of 150 mg. The study and control groups are both treated  
8 with ICBT.<sup>24</sup> The trial design includes two different recruitment pathways (A and B) (Figure  
9 1). The primary outcome is achieved with scoring of the neurodevelopment of the child at 2  
10 years of age. The framework for neurodevelopment is non-inferiority, whereas the add-on  
11 effect of SSRI to ICBT is a traditional superiority test. The tertiary objectives are exploratory.  
12  
13  
14  
15

16 **Figure 1.** Trial design and participant timeline for the two recruitment pathways. The figure  
17 also shows the treatment with placebo/sertraline from visit 2 (pregnancy week 13-24) to visit  
18 6 (4 weeks postpartum) and the ICBT for both groups for 12 weeks, between visit 2 and visit  
19 4 (pregnancy week 26-36) and monitoring of therapy for the two groups. The post-partum  
20 follow-up of both mother and child are shown. The different scales and examinations are, as  
21 presented in the figure: 1) Edinburgh Postnatal Depression Scale (EPDS)<sup>39</sup>, 2) The diagnose  
22 moderate depression is confirmed according to clinical standard evaluation. Inclusion and  
23 exclusion criteria presented in table 1. 3) Evaluation with Montgomery-Åsberg Depression  
24 Scale (MADRS)<sup>40</sup>, 4) Modified Finnegan Neonatal Abstinence Scale (NAS)<sup>41</sup>, 5)  
25 Hammersmith Neonatal Neurological Examination (HNNE)<sup>42</sup>, 6) Hammersmith Infant  
26 Neurological Examination (HINE)<sup>43</sup>, 7) Bayley Scales of Infant and Toddler Development  
27 III<sup>®</sup> (BSID III<sup>®</sup>)<sup>44</sup>.  
28  
29  
30

## 31 Recruitment and blinding

32  
33 Pregnant women are recruited either from the antenatal health clinics (Figure 1, Pathway A)  
34 or through social media and our study website [www.magdalenastudien.se](http://www.magdalenastudien.se) (Figure 1, Pathway  
35 B). Pregnant women visit their midwives at the antenatal clinics, commonly with their  
36 partners, around ten times during pregnancy free of charge. In pathway A, the midwives  
37 inform about the study at a regular visit. The recruitment through the study website, pathway  
38 B, is simplified by informing about the study to potential subjects continuously through social  
39 media, pregnancy related information platforms, different blogs and podcasts. Smartphone  
40 pregnancy applications are popular, reaching about 75% of pregnant women in cross-sectional  
41 studies in English and Spanish speaking countries. We assume similar, if not higher, usage in  
42 Sweden.<sup>45,46</sup> In both pathways, the women are directed our study platform at the internet  
43 psychiatry website, [www.internetpsykiatri.se](http://www.internetpsykiatri.se). They are asked to fill the Edinburgh Postnatal  
44 Depression Scale (EPDS)<sup>39</sup> self-test to assess the degree of depressive symptoms as well as to  
45 sign the first informed consent form. Regardless of recruitment pathway, the women will  
46 continue their regular visits at their home antenatal clinic.  
47  
48  
49

50  
51 We have chosen 13 or more points on the EPDS for further evaluation of eligibility for the  
52 study. The reason is that it has been found to be the optimal cut-off point with 77% sensitivity  
53 and 94% specificity for detection of depressive symptoms during pregnancy.<sup>39</sup> The subjects  
54 scoring 13 points or more on the EPDS self-test and lacking exclusion criteria are scheduled  
55 to meet one of our three study psychiatrists for clinical evaluation, including SCID-I directed  
56  
57  
58  
59



interview (Structured Clinical Interview for DSM IV axis I disorders)<sup>47</sup>, review of eligibility criteria and signing of the final informed consent form. (Visit 1, Fig.1, Table 1). The included women are allocated to the next consecutive patient number and randomised to treatment by Karolinska Trial Alliance (KTA), see below. The KTA will also ensure correct blinding for all trial participants, care providers, outcome assessors and data analysts, including labelling of the study drug packages. The drug treatment with study drug (sertraline or placebo) is initiated after visit 2 (Fig.1). At the same time, the women start ICBT treatment using the internet psychiatry website.<sup>19,24</sup> Both study and control groups receive capsules of identical appearance and packing (See below). The treatment code is broken and a new clinical evaluation is performed by the study psychiatrist one month after the delivery. The treatment will be continued for one year after the delivery for all patients in the active treatment arm. The women in the placebo group that haven't reached remission will also be offered treatment with SSRI. Both the women and the psychiatrist are forbidden to inform anyone in the study about which group they have belonged to, to ensure the continued blinding of the study. This is particularly important regarding the paediatricians and paediatric psychologists assessing the children.

|                    |                                                                                                                                                                                                                                                                                                                                                                                                                                                                                                                                                                                                                                                                            |
|--------------------|----------------------------------------------------------------------------------------------------------------------------------------------------------------------------------------------------------------------------------------------------------------------------------------------------------------------------------------------------------------------------------------------------------------------------------------------------------------------------------------------------------------------------------------------------------------------------------------------------------------------------------------------------------------------------|
| Inclusion Criteria | <ul style="list-style-type: none"> <li>▪ Age &gt;18 years</li> <li>▪ Pregnant in week 9 to 21 after last menstrual period.</li> <li>▪ Verified moderate depression according to SCID-I (with or without a concomitant anxiety disorder) and a clinical evaluation.</li> <li>▪ Ability to use the internet platform for ICBT in Swedish as assessed by the study midwife.</li> <li>▪ Reported ability to participate in all study visits for mother and child.</li> </ul>                                                                                                                                                                                                   |
| Exclusion Criteria | <ul style="list-style-type: none"> <li>▪ Reported abuse of alcohol or drugs</li> <li>▪ Reported serious psychiatric disorder<sup>1</sup></li> <li>▪ Known allergy or idiosyncratic reaction to sertraline</li> <li>▪ Ongoing medication with antidepressants, mood-stabilizers, central stimulants, antiepileptic drugs, opiates, insulin, oral anti-diabetics, antiarrhythmics or steroids.</li> <li>▪ A severe somatic disease<sup>2</sup> that requires medical treatment.</li> </ul> <p>A high suicidal risk during screening or when included into the study. These women will be excluded from the study and actively transferred to necessary psychiatric care.</p> |

**Table 1.** Inclusion and exclusion criteria for the MAGDALENA study. <sup>1</sup>) Psychosis, bipolar disorder, severe melancholic or psychotic depression, severe personality disorder, autism, ADHD/ADD with ongoing drug treatment or mental retardation <sup>2</sup>) Severe heart and lung disease, kidney disease, liver disease, diabetes mellitus, epilepsy with drug treatment and any severe somatic disease that requires regular treatment with systemic steroids.

**Figure 2.** The recruitment base in Stockholm Healthcare Region. Numbers based on an analysis of prescription of SSRI:s in pregnant women in years 2013-2016 in the Stockholm healthcare region with 2,3 million inhabitants Acknowledgements).

## The study drugs

1  
2  
3 The investigational medicinal product (IMP) is a capsule containing either sertraline  
4 hydrochloride or placebo manufactured by APL (Apoteket Produktion & Laboratorier AB,  
5 Stockholm, Sweden). The capsules of active drug are made of hard gelatine and filled with  
6 sertraline hydrochloride corresponding to 25mg sertraline using Zolof<sup>®</sup> (25mg sertraline  
7 film-coated tablets, Pfizer Ltd, New York) and with a microcrystalline cellulose filler. The  
8 placebo capsules are made of identical microcrystalline cellulose filler embedded into an  
9 identical hard gelatine capsule. The IMP is delivered by the producer in sealed HD  
10 polyethylene containers, labelled according to a randomisation list. Patients are randomised to  
11 treatment by Karolinska Trial Alliance (KTA) with block randomisation. The size of these  
12 blocks is blinded for the investigators.  
13

14  
15 The treatment with sertraline (or placebo) starts with titration of a dose of 1 capsule (25 mg  
16 sertraline or placebo) once daily for 5 days, after which the dose is increased to 2 capsules (50  
17 mg of sertraline or placebo) once daily until the first treatment evaluation (Visit 3, Fig.1). At  
18 visit 3 the daily dose can be increased to 4 capsules (100 mg of sertraline or placebo) once  
19 daily if clinically indicated, with titration of 3 capsules (75 mg of sertraline or placebo) once  
20 daily for 5 days. At visit 4 after 13 weeks of treatment, the dose can be increased further to a  
21 maximum 150 mg daily, without titration, if clinically needed. The decision of need to  
22 increase drug dosages is based on MADRS scores and a clinical evaluation made by the study  
23 psychiatrist. To follow and increase the adherence to treatment, the women will get a limited  
24 amount of capsules at each visit, motivating them to return for the next visit and giving the  
25 study midwife a way to notice if the subject is not taking the drug. Additional telephone  
26 contacts with the psychiatry nurse are performed if concerns about the treatment effect are  
27 raised, and an additional visit to the psychiatrist is scheduled if necessary.  
28  
29  
30  
31

## 32 **The Internet-based Cognitive Behaviour therapy**

33  
34 The ICBT-treatment is 12 weeks long and guided by a psychologist who is available online. It  
35 consists of an online platform where patients log in to answer questionnaires and work with  
36 self-help material covering the core materials in CBT for depression including interactive  
37 worksheets and exercises. They are also assigned weekly homework to report to their personal  
38 therapist. A direct messaging system allows for asynchronous correspondence with one of the  
39 therapists at any time and get a reply within a day or two. The platform allows monitoring to  
40 what extent the patients adhere to the therapeutic sessions.  
41  
42

43 The pregnancy-related adaptations to the treatment consist of an extra module on pregnancy  
44 related symptoms that can lower mood at the beginning of the treatment and an extra module  
45 on relationships at the end of treatment. Other than that, the interventions mostly mirror those  
46 described and used by us in our ICBT-platform for non-pregnant adults.<sup>19</sup> The examples and  
47 cases includes concern pregnant women and their thoughts on pregnancy and becoming a  
48 parent and expanding their family. The core methods of the treatment are behavioural  
49 activation (increasing positive and valued activities) and cognitive restructuring (challenging  
50 own thoughts and distance oneself from dysfunctional thoughts and rumination).  
51  
52  
53

## 54 **Outcome measurements**

### **Primary outcome: effect on neurodevelopment at 2 years of age**

The cognitive development at 2 years of age is the primary outcome. The outcome in children exposed and not exposed to sertraline *in utero* is measured with the standardized Bayley Scales of Infant and Toddler Development III (BSID-III<sup>®</sup>)<sup>44</sup> and compared between the groups. The BSID-III consists of the Cognitive, Language and Motor Scales that are performed by a child psychologist, and the Social Emotional and the Adaptive Scales that are parental questionnaires. The Cognitive and Language scales have proven to be good predictors of preschool mental test performance.<sup>48</sup> These scales are largely used in screening for cognitive developmental delays<sup>49</sup> and have been used in studies of cognitive development after intrauterine drug exposure.<sup>50-52</sup> Results from the subscales will be converted to composite scores with a median of 100 and a standard deviation of 15. For each subscale, a composite score of <85 (<1SD) will be considered abnormal. A difference of 7 points (0.5 SD) between the groups will be considered significant, which is in line with the assumptions made in previous similar studies.<sup>49</sup>

### **Sample size calculation**

A difference of 7 points (SD 0.5) with a power of 80% ( $\alpha$ : 0,05) in the results when testing with BSID-III<sup>®</sup> at 2 years of age is estimated to give a clinically important significant difference in a sample of 73 participating children in each group. Therefore we aim at recruiting 100 mothers in each group.

### **Secondary outcome**

The main psychiatric secondary outcome is the add-on effect of sertraline to the treatment with I-CBT on depressive symptoms measured with MADRS-S (Montgomery-Åsberg Depression Rating Scale, Self-Report)<sup>53</sup> which is performed weekly throughout the 12 week treatment period.

### **Sample size calculation for the secondary outcome**

The additional effect of sertraline as compared to standard ICBT plus placebo will be evaluated by comparing effects on MADRS-S scores between the groups. Data on the total effect of CBT combined with antidepressant therapy is limited. The standardized effect of psychotherapy can be as high as 0.74 when compared to placebo and 0.38 when compared to face-to-face psychotherapy.<sup>26</sup> ICBT is largely self-directed even with therapist guidance, which is likely to put a higher demand on the patients in terms of initiative and maintaining the motivation compared to face-to-face-treatment. Therefore, it is likely that the added effect of SSRI will be larger than what has been found in face-to-face CBT, though not as large as when compared to placebo alone. We therefore hypothesize a standardized effect size of  $d=0.50$  (Cohen). This is also the minimal added effect that we would consider clinically relevant considering the possibility of negative side effects and the documented efficacy of ICBT alone.<sup>24</sup> A sample size calculation with standardized effect equal to 0.5 (Cohen),  $\alpha$ -value=0.05 and power 80% requires 64 persons in each group. Therefore to recruit 100 patients in each group will fulfil the power calculation.

### **Exploratory tertiary studies**

Exploratory maternal outcomes include the effects on levels on prolactine and cytokines and the risk for postpartum bleeding measured in mL and postpartum anaemia measured with haemoglobin day 2 for the SSRI-exposed women as compared to the placebo-exposed. We also evaluate the risk of preeclampsia, placental abruption and increased caesarean section rate.

1  
2  
3  
4 The neonatal exploratory outcomes include admission to neonatal care, neurological  
5 evaluation with Hammersmith Neonatal Neurological Examination (HNNE)<sup>42</sup> and modified  
6 Finnegan Neonatal Abstinence Scales (NAS)<sup>41</sup> and measurement of glucose and  
7 concentrations of sertraline in plasma.  
8

9 In a sub-cohort, blood samples from the umbilical cord and placental biopsies are taken to  
10 study epigenetic effects (DNA methylation, genome width, gene and miRNA expression)  
11 between SSRI-exposed and the non-exposed within this cohort.  
12

13 We will study differences in maternal-child bonding/attachment during and after birth and  
14 also breastfeeding occurrence. Prenatal Attachment Inventory-Revised questionnaires and  
15 video recordings analysed by "Dr Feldman's micro-coded behaviours" will be used which is a  
16 valid tool to study attachment.<sup>54</sup> A comparison will be made between the two groups.  
17

18 The pharmacokinetic analyses include studies of interindividual variability in plasma  
19 sertraline concentrations and its change during the course of pregnancy and postpartum (mean  
20 concentration/(dose in mg/kg) with confidence intervals. Pharmacogenetic variants of drug  
21 metabolizing enzymes and transporters will be studied in pregnant women and newborns.  
22 Umbilical cord blood and venous blood from the neonate will be taken and plasma sertraline  
23 levels are assayed. Variability in exposure to sertraline between the neonates will be  
24 investigated and the levels will be related to the degree of maladaptation syndrome.  
25  
26  
27

## 28 **Data management**

29 Each subject will receive a study number for identification. Data will be collected  
30 continuously and entered into the electronic Case Report File (eCRF) within two weeks from  
31 collection. The e-CRF includes range checks for data values to promote data quality. For the  
32 study database we are using an electronic system, Pheedit version 3,0; SAS Institute Inc.,  
33 Cary, NC, provided by Stockholm Healthcare Region, Sweden. The data is encrypted and  
34 safely stored on an electronic server at the Karolinska Institute in Stockholm. The e-CRF is  
35 previously used in randomised controlled studies.<sup>55</sup> After completed data collection, the  
36 investigators will receive unidentified patient data withdrawn from the CRF and synchronized  
37 with data from the internet psychiatry platform. The internet psychiatry platform was also  
38 used in our previous study.<sup>24</sup> The investigators will analyse this data for the different  
39 endpoints of the study. The samples from whole blood (mainly to extract DNA for  
40 pharmacogenetic analyses in the mother and in the newborns), plasma, cord blood, placenta  
41 biopsies and the buccal swabs will be stored in the biobank at Karolinska Institutet in  
42 Stockholm, available for analyses and future research.  
43  
44  
45  
46  
47  
48  
49

## 50 **Statistical Methods**

51 The main analyses will be done according to the intention to treat principle. Data will also be  
52 analysed per protocol to achieve an efficacy analysis. The primary endpoint, results of BSID  
53 III<sup>®</sup> will be analysed with Student's T-test. Multiple imputation will be used for missing data.  
54 The variables used in the imputation mode will be smoking, education level and parity. All  
55 patients' demographic data will be analysed by descriptive (mean, median and range)  
56  
57  
58  
59

1  
2  
3 statistics. Fishers exact test will be used for dichotomous variables such as infant sex,  
4 mother's smoking and optimal/suboptimal neurology at Hammersmith neonatal neurological  
5 examination. Throughout the analysis, the mean and standard deviation will be calculated for  
6 all continuous data using Student's T-test. The non-normally distributed continuous variables,  
7 including the results from Hammersmith neurological scales will be analysed with the Mann-  
8 Whitney u test and the results of MADRS-S by Cohens effect size. For categorical variables,  
9 absolute frequency, percentages and/or proportions are calculated and Fishers exact test will  
10 be used. The treatment effect analysis will be a multilevel model for longitudinal data with  
11 timepoints nested within individuals (a.k.a. Growth Curve Modeling) using MADRS-S scores  
12 from baseline, each of the 12 weeks in treatment, and post treatment. A p-value of <0,05 will  
13 be considered significant. Sub group analyses will be performed for smokers, parity, maternal  
14 age and education level. Spearman's correlation test will be used to test the correlation  
15 between maternal and infant drug concentration.  
16  
17  
18  
19  
20

## 21 **Ethics and dissemination**

### 22 **Adverse events**

23  
24 Sertraline is one of the recommended drugs for depression during pregnancy in Stockholm  
25 Healthcare Region by the Drug and Therapeutics Committee with high adherence.<sup>56,57</sup>  
26 Sertraline is also one of the most prescribed SSRIs in the Nordic countries, and is widely used  
27 across Europe for treatment of depression during pregnancy.<sup>3,58,59</sup> Thereby the therapeutic  
28 profile, the adverse effects and the adverse reactions are well known to the study psychiatrists.  
29  
30  
31

32 An adverse event (AE) is defined as any undesirable experience associated with the use of the  
33 trial drug, sertraline or placebo. A serious adverse event (SAE) is defined as death, a life-  
34 threatening event, hospitalization (initial or prolonged), disability, permanent damage or a  
35 congenital birth defect. Expected serious adverse reactions are listed in the Summary of  
36 Product Characteristics (SPC). A Suspected Unexpected Serious Adverse Reaction (SUSAR)  
37 is defined as an adverse effect not listed in the SpC and not mentioned in the SPC as  
38 anticipated due to pharmacokinetic properties of the drug, or as a reaction that has occurred  
39 with other drugs in this class, but not with the study drug. Unexpected adverse events to ICBT  
40 will also be reported. All adverse events occurring after enrolment are documented in the  
41 electronic Case Report Form (e-CRF). The adverse events will be reported to the principal  
42 investigator, who will report to the sponsor, and in due cases the Karolinska Trial Alliance  
43 (KTA) for registration in EuraVigilance. All unexpected serious adverse reactions have to be  
44 reported within 24 hours after notification by the study personnel. In case of a serious adverse  
45 event such as death or a life threatening event, the PI will raise the issue of breaking the code  
46 and termination of the study with the Data Monitoring and Safety Committee (see below).  
47 The committee are responsible for the final decision of study termination. The sponsor will  
48 each year of the study perform a safety report (DSUR) to Swedish Medical Products Agency.  
49  
50  
51  
52  
53

### 54 **Monitoring and Study safety**



1  
2  
3 An independent monitor from Karolinska Trial Alliance (KTA), Karolinska University  
4 Hospital, will continuously control that the study follows approved protocol, with regular  
5 audits with the study midwife and the PI. The staff at KTA have all relevant certifications for  
6 Good Clinical Practice (GCP) procedures. Participation in the study is voluntary and women  
7 are free to discontinue their participation at any time and for whatever reason without  
8 explanations. Midwives at the outpatient clinics and at the delivery clinic have been made  
9 aware of this. A Data Monitoring and Safety Committee (DMC) with senior experts in  
10 biostatistics, psychiatry, clinical pharmacology (sub-specialised in paediatrics) and  
11 neonatology. The committee can at any time if there is any suspicion of a serious adverse  
12 event break the code and undertake necessary precautions including stopping the study. The  
13 committee is independent from the sponsor with no competing interests or involvement in the  
14 design, planning or management of the study. The DMC is also responsible for developing  
15 guidelines for interruption of the study and for any interim analyses. The DMC is responsible  
16 for deciding if sub-study exploratory investigations can be carried out before the recruitment  
17 of all 200 mothers and all 2-year neurodevelopment investigations are completed.  
18  
19  
20  
21  
22

### 23 **Dissemination plan**

24  
25 This study has as main aim to clarify if any long-term effect on neurodevelopment can be  
26 detected in children exposed to sertraline therapy *in utero*. Other issues will be studied as  
27 secondary and tertiary objectives including evaluation of the add-on effect of sertraline to  
28 ICBT in moderately depressed pregnant women. The study team will design and implement a  
29 knowledge translation (KT) plan using established methods for dissemination of scientific  
30 results but also modern communication strategies using social media. The KT plan will  
31 benefit from strength of being a multidisciplinary scientific group with access to numerous  
32 regional, national and international scientific and clinical communities and active  
33 involvement of many of the study group scientists in communication with patient groups on  
34 psychiatric health and drug therapy during pregnancy. The team has combined years of  
35 experience to communicate with colleagues on drug recommendations and achieve high  
36 adherence to them using a combination of multifaceted (marketing, continuous medical  
37 education, decision support and quality network with colleagues).<sup>56,57</sup> In summary we will use  
38 established scientific channels to communicate our findings (A): 1. At national and  
39 international scientific meetings, 2. As international scientific publications including  
40 publishing our study protocol and 3. By contacting relevant international bodies for  
41 development of guidelines on best practice in treatment of psychiatric diseases during  
42 pregnancy including WHO. We will also use modern communication methods<sup>56,57</sup> (B): 1. To  
43 summarize our findings for laymen and pregnant groups in Swedish and English and 2. To  
44 cooperate with these groups to have information disseminated through their publications and  
45 websites. Our aim is to improve knowledge about the need to a higher degree treat depression  
46 during pregnancy with the alternatives that we and others have found effective. If we, as  
47 hypothesized, will find no effect of sertraline therapy on neurodevelopment in two year old  
48 infants, it will be one of the most relevant findings to communicate scientifically and to  
49 laymen. The legitimacy of our findings will be high if the results are published in peer-  
50 reviewed journals and presented at national and international scientific conferences for  
51 scrutiny and discussion.  
52  
53  
54  
55  
56  
57  
58  
59  
60

## Discussion

We hypothesise that sertraline exposure in therapeutic dosage during pregnancy does not affect the cognition in the offspring as assessed by BSID-III<sup>®</sup> at 2 years of age. Recent large register based studies<sup>16,17</sup> support our hypothesis and imply the importance of a randomised controlled trial to receive sound evidence in this question. As the previous observational studies comment,<sup>12,13</sup> they have not found a way to adequately adjust for unmeasurable confounders, such as genetic inheritance and disease severity, that we suspect play a significant role when interpreting the results. Using a randomised design in the MAGDALENA study, we minimize the risk for confounding factors.

We also aim to clarify whether combination therapy with ICBT and sertraline is an adequate treatment alternative for moderate depression during pregnancy. This new treatment option provides the pregnant women relevant pregnancy-related questions and the possibility to individually schedule the treatment sessions. Also to our knowledge, no prior placebo-controlled clinical trials have assessed whether combination treatment is superior to treatment with ICBT alone, which we are doing. The risks for the participating women and their offspring are not increased compared to the regular treatment available, as sertraline is widely used in clinical routine in Sweden today. On the contrary, the participating women will have a more thorough follow up than in clinical practice.

The ethics of performing a RCT in this field has been discussed.<sup>60,61</sup> Our study design with ICBT and sertralin or placebo for depression during pregnancy was enabled by recent studies that confirmed the safety and efficacy of ICBT in treating depression, including prenatal depression.<sup>24,28</sup> To date, there is to our knowledge no other study group performing a similar study with the neurodevelopment of the offspring as the main outcome measure. An ongoing Dutch study group randomise clinically undepressed women on antidepressive treatment to either guided drug discontinuation with CBT or continuation of drug therapy.<sup>62</sup> Their primary outcome is the incidence of relapse or recurrence of maternal depression, but they also look at the long-term neurodevelopment with questionnaire based follow-up at 18 months. We consider our method with psychological assessment at 2 years of age more reliable than parental questionnaires. We think that these two studies will complement each other well. Our study will have the unique opportunity to distinguish the effects of exposure to SSRI in utero from the ones of underlying depression, considering our inclusion criteria of moderately depressed women.

A limitation with our study design is the strict inclusion and exclusion criteria potentially causing problems in generalising the results to larger groups of depressed pregnant women. So far, we have not seen any tendencies to exclusion of relevant subgroups. The most common reason for exclusion so far has been not having a severe enough, treatment requiring depression. We collect baseline data from all excluded patients to stay informed about potential statistical biases caused by exclusion. We also know, that the recruitment will be challenging, considering the limited study population of clinically depressed, pregnant women without medical treatment with a short time frame for recruitment. We have addressed this using a combined approach recruiting both at ordinary antenatal clinics and through social media, pregnancy applications on smart-phones as well as with marketing campaigns. Studies worldwide show that three out of four pregnant women use a pregnancy related application, showing their great potential.<sup>45,46</sup> Our web-based recruitment and treatment also gives us the possibility to invite additional study centres across the country if necessary to complete the recruitment. We are constantly facing fears from potential subjects of taking antidepressant



1  
2  
3 treatment during pregnancy.

4  
5 We have been working with this study for four years, specifying and completing the protocol  
6 and getting ethical approval and permission from the national Medical Products Agency. In  
7 addition, it has taken an additional year to test the feasibility by completing the first five  
8 patients through the pregnancy and delivery parts of the trial (January 2018). During these  
9 five years, the multidisciplinary research group with less and more experienced members has  
10 had regular meetings. So far, we have not met any problems in raising needed funds, received  
11 both from major national and regional funders of clinical research as well as from multiple  
12 funders specialized to support studies on safe care of mother and child during pregnancy and  
13 in early life. Therefore, we are confident to finish the recruitment within six years, based on  
14 our calculations on data from Stockholm Healthcare Region (Figure 2) and publish the results  
15 in another three years.  
16  
17  
18  
19

## 20 **Declarations**

### 21 **Ethics approval and consent to participate**

22  
23  
24 The Regional Ethical Review Board at Karolinska Institutet in Stockholm approved this study  
25 with the approval number 2014/952-31 with the last amendment approved 20170116. The  
26 Swedish Medical Products agency approved this study with the approval number 5.1-2016-  
27 51237 with the last amendment approved 20160701. Written consent is obtained from all  
28 participants at inclusion. At child birth, written consent is obtained from the child's other  
29 guardian. All protocol amendments are sent to the Regional Ethical Review Board and the  
30 Medical Products Agency for approval before taken in practice. A copy is also sent to the  
31 registrar at clinicaltrials.gov.  
32  
33

### 34 **Availability of data and material**

35  
36 Not applicable.

### 37 **Competing interests**

38  
39 The authors declare that they have no competing interests.  
40  
41  
42

### 43 **Funding**

44  
45 This project is funded by the Swedish Research Council (DNR 521-2012-3466), the regional  
46 agreement on medical training and clinical research between Karolinska Institutet and  
47 Stockholm City Council (ALF, project number 533069 years 2015-2017 and project number  
48 571301 years 2018-2020) and Lilla Barnets Fond. The funding agencies do not have any part  
49 in the design, data collection and analysis or reporting of this trial.  
50  
51

### 52 **Authors' contributions**

53  
54  
55 EH and LLG wrote the initial study protocol article with the help of BSS, LF and AF. KW is  
56 the principal investigator and JN, LLG, MB and VK are members of the governing study  
57  
58  
59

board. MB is the sponsor and the main applicant and receiver of our initial ground-breaking funding decision from the Swedish Research Council. MB is also a senior researcher with full responsibility of the study design and participation in completion of the manuscript. JN, KW and MB conceived the study protocol and KW wrote the initial draft of the study protocol. EA is developing an exploratory study protocol studying attachment in a subgroup of the pregnant women. MBk, SF and EH launched the open recruitment through different social media platforms. VK and EF adapted the ICBT procedure for use in our pregnant women and are responsible for the ICBT treatment. They also directed the pilot study. AF is the study midwife coordinating the visits and the day to day management of the study. M.B-W, MS and AJ are the study psychiatrists responsible for the initial assessment and inclusion in the study as well as for the clinical decisions about pharmacotherapy. E-M.N is the psychiatry nurse responsible for the treatment evaluations. All authors have in different ways been involved in different degrees in the development of study design and take responsibility for the final study design. All authors have contributed to the protocol development and have read and approved the final protocol that we now use after revisions as well as this manuscript. EH and LLG coordinated the completion of the study protocol article.

## Acknowledgements

We used the SPIRIT checklist when writing this article.<sup>63</sup> We would like to acknowledge M. Juhasz-Haverinen at Public Healthcare Services Committee (HSF) at Stockholm Healthcare Region (SLL) for providing data on our recruitment base of patients for the study (Figure 2) as well as M Bendix, ML Dahl and C Ruck for input on the study protocol at an early phase. We would also like to acknowledge all women, their babies and their families who participate in the MAGDALENA study and the numerous midwives, obstetricians and staff at all MAGDALENA recruiting Antenatal Clinics and Maternity Wards and Delivery Units in Stockholm Healthcare Region.

## Trial Registration and Status

European Clinical Trials Database (EudraCT) Number: 2013-004444-31. Date registered 20140511. Current protocol version 5.2 161121. Recruitment start 2016. Approximate completion of recruitment 2023, approximate completion of data collection 2025.

## References

1. Le Strat Y, Dubertret C, Le Foll B. Prevalence and correlates of major depressive episode in pregnant and postpartum women in the United States. *J Affect Disord* 2011;135(1-3):128-38. doi: 10.1016/j.jad.2011.07.004
2. Gavin NI, Gaynes BN, Lohr KN, et al. Perinatal depression: a systematic review of prevalence and incidence. *Obstet Gynecol* 2005;106(5 Pt 1):1071-83. doi: 10.1097/01.AOG.0000183597.31630.db
3. Zoega H, Kieler H, Norgaard M, et al. Use of SSRI and SNRI Antidepressants during Pregnancy: A Population-Based Study from Denmark, Iceland, Norway and

- Sweden. *PLoS One* 2015;10(12):e0144474. doi: 10.1371/journal.pone.0144474 [published Online First: 2015/12/15]
4. Qiu C, Williams MA, Calderon-Margalit R, et al. Preeclampsia risk in relation to maternal mood and anxiety disorders diagnosed before or during early pregnancy. *Am J Hypertens* 2009;22(4):397-402. doi: 10.1038/ajh.2008.366 [published Online First: 2009/02/07]
  5. Grote NK, Bridge JA, Gavin AR, et al. A meta-analysis of depression during pregnancy and the risk of preterm birth, low birth weight, and intrauterine growth restriction. *Arch Gen Psychiatry* 2010;67(10):1012-24. doi: 10.1001/archgenpsychiatry.2010.111
  6. Field T, Diego M, Hernandez-Reif M. Prenatal depression effects on the fetus and newborn: a review. *Infant Behav Dev* 2006;29(3):445-55. doi: 10.1016/j.infbeh.2006.03.003
  7. Gentile S. Untreated depression during pregnancy: Short- and long-term effects in offspring. A systematic review. *Neuroscience* 2017;342:154-66. doi: 10.1016/j.neuroscience.2015.09.001
  8. Norby U, Forsberg L, Wide K, et al. Neonatal Morbidity After Maternal Use of Antidepressant Drugs During Pregnancy. *Pediatrics* 2016;138(5) doi: 10.1542/peds.2016-0181
  9. Andrade SE, Reichman ME, Mott K, et al. Use of selective serotonin reuptake inhibitors (SSRIs) in women delivering liveborn infants and other women of child-bearing age within the U.S. Food and Drug Administration's Mini-Sentinel program. *Arch Womens Ment Health* 2016;19(6):969-77. doi: 10.1007/s00737-016-0637-1
  10. Furu K, Kieler H, Haglund B, et al. Selective serotonin reuptake inhibitors and venlafaxine in early pregnancy and risk of birth defects: population based cohort study and sibling design. *BMJ* 2015;350:h1798. doi: 10.1136/bmj.h1798 [published Online First: 2015/04/19]
  11. Oberlander TF, Gingrich JA, Ansorge MS. Sustained neurobehavioral effects of exposure to SSRI antidepressants during development: molecular to clinical evidence. *Clin Pharmacol Ther* 2009;86(6):672-7. doi: 10.1038/clpt.2009.201
  12. Rai D, Lee BK, Dalman C, et al. Parental depression, maternal antidepressant use during pregnancy, and risk of autism spectrum disorders: population based case-control study. *BMJ* 2013;346:f2059. doi: 10.1136/bmj.f2059
  13. Rai D, Lee BK, Dalman C, et al. Antidepressants during pregnancy and autism in offspring: population based cohort study. *BMJ* 2017;358:j2811. doi: 10.1136/bmj.j2811 [published Online First: 2017/07/21]
  14. Croen LA, Grether JK, Yoshida CK, et al. Antidepressant use during pregnancy and childhood autism spectrum disorders. *Arch Gen Psychiatry* 2011;68(11):1104-12. doi: 10.1001/archgenpsychiatry.2011.73 [published Online First: 2011/07/06]
  15. El Marroun H, White TJ, van der Knaap NJ, et al. Prenatal exposure to selective serotonin reuptake inhibitors and social responsiveness symptoms of autism: population-based study of young children. *Br J Psychiatry* 2014;205(2):95-102. doi: 10.1192/bjp.bp.113.127746
  16. Brown HK, Ray JG, Wilton AS, et al. Association Between Serotonergic Antidepressant Use During Pregnancy and Autism Spectrum Disorder in Children. *JAMA* 2017;317(15):1544-52. doi: 10.1001/jama.2017.3415
  17. Sujan AC, Rickert ME, Oberg AS, et al. Associations of Maternal Antidepressant Use During the First Trimester of Pregnancy With Preterm Birth, Small for

- 1  
2  
3 Gestational Age, Autism Spectrum Disorder, and Attention-  
4 Deficit/Hyperactivity Disorder in Offspring. *JAMA* 2017;317(15):1553-62.  
5 doi: 10.1001/jama.2017.3413
- 6 18. Morales DR, Slattery J, Evans S, et al. Antidepressant use during pregnancy and risk of  
7 autism spectrum disorder and attention deficit hyperactivity disorder:  
8 systematic review of observational studies and methodological considerations.  
9 *BMC Med* 2018;16(1):6. doi: 10.1186/s12916-017-0993-3 [published Online  
10 First: 2018/01/16]
- 11 19. Hedman E, Ljotsson B, Kaldo V, et al. Effectiveness of Internet-based cognitive  
12 behaviour therapy for depression in routine psychiatric care. *J Affect Disord*  
13 2014;155:49-58. doi: 10.1016/j.jad.2013.10.023
- 14 20. O'Mahen HA, Woodford J, McGinley J, et al. Internet-based behavioral activation--  
15 treatment for postnatal depression (Netmums): a randomized controlled trial.  
16 *Journal of affective disorders* 2013;150(3):814. doi: 10.1016/j.jad.2013.03.005
- 17 21. Danaher BG, Milgrom J, Seeley JR, et al. MomMoodBooster Web-Based Intervention for  
18 Postpartum Depression: Feasibility Trial Results. *J Med Internet Res*  
19 2013;15(11):20. doi: 10.2196/jmir.2876
- 20 22. O'Mahen HA, Richards DA, Woodford J, et al. Netmums: a phase II randomized  
21 controlled trial of a guided Internet behavioural activation treatment for  
22 postpartum depression. *Psychol Med* 2014;44(8):1675-89. doi:  
23 10.1017/s0033291713002092
- 24 23. Pugh NE, Hadjistavropoulos HD, Dirkse D. A Randomised Controlled Trial of Therapist-  
25 Assisted, Internet-Delivered Cognitive Behavior Therapy for Women with  
26 Maternal Depression. *PLoS ONE* 2016;11(3):e0149186. doi:  
27 10.1371/journal.pone.0149186
- 28 24. Forsell E, Bendix M, Hollandare F, et al. Internet delivered cognitive behavior therapy for  
29 antenatal depression: A randomised controlled trial. *J Affect Disord*  
30 2017;221:56-64. doi: 10.1016/j.jad.2017.06.013 [published Online First:  
31 2017/06/20]
- 32 25. Nationella riktlinjer för vård vid depression och ångestsyndrom: Socialstyrelsen.  
33 [https://roi.socialstyrelsen.se/riktlinjer/nationella-riktlinjer-for-var-d-vid-](https://roi.socialstyrelsen.se/riktlinjer/nationella-riktlinjer-for-var-d-vid-depression-och-angestsyndrom)  
34 [depression-och-angestsyndrom](https://roi.socialstyrelsen.se/riktlinjer/nationella-riktlinjer-for-var-d-vid-depression-och-angestsyndrom); 2017 [accessed 16/02 2018].
- 35 26. Cuijpers P, Sijbrandij M, Koole SL, et al. Adding psychotherapy to antidepressant  
36 medication in depression and anxiety disorders: a meta-analysis. *World*  
37 *Psychiatry* 2014;13(1):56-67. doi: 10.1002/wps.20089 [published Online First:  
38 2014/02/06]
- 39 27. Andrews G, Cuijpers P, Craske MG, et al. Computer therapy for the anxiety and  
40 depressive disorders is effective, acceptable and practical health care: a meta-  
41 analysis. *PLoS One* 2010;5(10):e13196. doi: 10.1371/journal.pone.0013196
- 42 28. Cuijpers P, Donker T, van Straten A, et al. Is guided self-help as effective as face-to-face  
43 psychotherapy for depression and anxiety disorders? A systematic review and  
44 meta-analysis of comparative outcome studies. *Psychol Med*  
45 2010;40(12):1943-57. doi: 10.1017/S0033291710000772
- 46 29. Lindqvist PG, Nasiell J, Gustafsson LL, et al. Selective serotonin reuptake inhibitor use  
47 during pregnancy increases the risk of postpartum hemorrhage and anemia: a  
48 hospital-based cohort study. *J Thromb Haemost* 2014;12(12):1986-92. doi:  
49 10.1111/jth.12757 [published Online First: 2014/10/18]
- 50 30. Moses-Kolko EL, Bogen D, Perel J, et al. Neonatal signs after late in utero exposure to  
51 serotonin reuptake inhibitors: literature review and implications for clinical  
52 applications. *JAMA* 2005;293(19):2372-83. doi: 10.1001/jama.293.19.2372  
53  
54  
55  
56  
57  
58  
59  
60

- 1  
2  
3 31. Basterzi AD, Aydemir C, Kisa C, et al. IL-6 levels decrease with SSRI treatment in  
4 patients with major depression. *Hum Psychopharmacol* 2005;20(7):473-6. doi:  
5 10.1002/hup.717 [published Online First: 2005/09/15]
- 6 32. Park YM. Serum Prolactin Levels in Patients with Major Depressive Disorder Receiving  
7 Selective Serotonin-Reuptake Inhibitor Monotherapy for 3 Months: A  
8 Prospective Study. *Psychiatry Investig* 2017;14(3):368-71. doi:  
9 10.4306/pi.2017.14.3.368 [published Online First: 2017/05/26]
- 10 33. Susser LC, Sansone SA, Hermann AD. Selective serotonin reuptake inhibitors for  
11 depression in pregnancy. *Am J Obstet Gynecol* 2016;215(6):722-30. doi:  
12 10.1016/j.ajog.2016.07.011 [published Online First: 2016/07/20]
- 13 34. Nonnenmacher N, Noe D, Ehrental JC, et al. Postpartum bonding: the impact of maternal  
14 depression and adult attachment style. *Arch Womens Ment Health*  
15 2016;19(5):927-35. doi: 10.1007/s00737-016-0648-y [published Online First:  
16 2016/06/15]
- 17 35. Freeman MP, Nolan PE, Jr., Davis MF, et al. Pharmacokinetics of sertraline across  
18 pregnancy and postpartum. *J Clin Psychopharmacol* 2008;28(6):646-53. doi:  
19 10.1097/JCP.0b013e31818d2048 [published Online First: 2008/11/18]
- 20 36. Hellden A, Madadi P. Pregnancy and pharmacogenomics in the context of drug  
21 metabolism and response. *Pharmacogenomics* 2013;14(14):1779-91. doi:  
22 10.2217/pgs.13.176 [published Online First: 2013/11/07]
- 23 37. Saiz-Rodríguez M, Belmonte C, Román M, et al. Effect of Polymorphisms on the  
24 Pharmacokinetics, Pharmacodynamics and Safety of Sertraline in Healthy  
25 Volunteers. *Basic Clin Pharmacol Toxicol*;0(0) doi: doi:10.1111/bcpt.12938
- 26 38. Viuff AC, Pedersen LH, Kyng K, et al. Antidepressant medication during pregnancy and  
27 epigenetic changes in umbilical cord blood: a systematic review. *Clin*  
28 *Epigenetics* 2016;8(1):94. doi: 10.1186/s13148-016-0262-x [published Online  
29 First: 2016/09/10]
- 30 39. Rubertsson C, Borjesson K, Berglund A, et al. The Swedish validation of Edinburgh  
31 Postnatal Depression Scale (EPDS) during pregnancy. *Nord J Psychiatry*  
32 2011;65(6):414-8. doi: 10.3109/08039488.2011.590606
- 33 40. Montgomery SA, Asberg M. A new depression scale designed to be sensitive to change.  
34 *Br J Psychiatry* 1979;134:382-9. [published Online First: 1979/04/01]
- 35 41. Forsberg L, Naver L, Gustafsson LL, et al. Neonatal adaptation in infants prenatally  
36 exposed to antidepressants--clinical monitoring using Neonatal Abstinence  
37 Score. *PLoS One* 2014;9(11):e111327. doi: 10.1371/journal.pone.0111327  
38 [published Online First: 2014/11/05]
- 39 42. Dubowitz L, Ricciw D, Mercuri E. The Dubowitz neurological examination of the full-  
40 term newborn. *Ment Retard Dev Disabil Res Rev* 2005;11(1):52-60. doi:  
41 10.1002/mrdd.20048 [published Online First: 2005/04/28]
- 42 43. Romeo DM, Cioni M, Palermo F, et al. Neurological assessment in infants discharged  
43 from a neonatal intensive care unit. *Eur J Paediatr Neurol* 2013;17(2):192-8.  
44 doi: 10.1016/j.ejpn.2012.09.006 [published Online First: 2012/10/16]
- 45 44. Albers CA, Grieve AJ. Test Review: Bayley, N. (2006). Bayley Scales of Infant and  
46 Toddler Development— Third Edition. San Antonio, TX: Harcourt Assessment.  
47 *J Psychoeduc Assess* 2007;25(2):180-90. doi: 10.1177/0734282906297199
- 48 45. Lupton D, Pedersen S. An Australian survey of women's use of pregnancy and parenting  
49 apps. *Women Birth* 2016;29(4):368-75. doi: 10.1016/j.wombi.2016.01.008  
50 [published Online First: 2016/02/15]
- 51 46. Osma J, Barrera AZ, Ramphos E. Are Pregnant and Postpartum Women Interested in  
52 Health-Related Apps? Implications for the Prevention of Perinatal Depression.  
53  
54  
55  
56  
57  
58  
59  
60



- 1  
2  
3 *Cyberpsychol Behav Soc Netw* 2016;19(6):412-5. doi:  
4 10.1089/cyber.2015.0549 [published Online First: 2016/06/22]
- 5 47. First MB. Structured Clinical Interview for DSM-IV Axis I Disorders, Clinician Version  
6 (SCID-CV). In: Spitzer C, ed. Washington, D.C.: American Psychiatric Press,  
7 Inc., 1996.
- 8 48. Bode MM, D'Eugenio DB, Mettelman BB, et al. Predictive validity of the Bayley, Third  
9 Edition at 2 years for intelligence quotient at 4 years in preterm infants. *J Dev*  
10 *Behav Pediatr* 2014;35(9):570-5. doi: 10.1097/DBP.000000000000110  
11 [published Online First: 2014/11/06]
- 12 49. Serenius F, Kallen K, Blennow M, et al. Neurodevelopmental outcome in extremely  
13 preterm infants at 2.5 years after active perinatal care in Sweden. *JAMA*  
14 2013;309(17):1810-20. doi: 10.1001/jama.2013.3786 [published Online First:  
15 2013/05/02]
- 16 50. Santucci AK, Singer LT, Wisniewski SR, et al. Impact of prenatal exposure to serotonin  
17 reuptake inhibitors or maternal major depressive disorder on infant  
18 developmental outcomes. *J Clin Psychiatry* 2014;75(10):1088-95. doi:  
19 10.4088/JCP.13m08902 [published Online First: 2014/11/06]
- 20 51. Casper RC, Fleisher BE, Lee-Ancas JC, et al. Follow-up of children of depressed  
21 mothers exposed or not exposed to antidepressant drugs during pregnancy. *J*  
22 *Pediatr* 2003;142(4):402-8. doi: 10.1067/mpd.2003.139
- 23 52. Cardonick EH, Gringlas MB, Hunter K, et al. Development of children born to mothers  
24 with cancer during pregnancy: comparing in utero chemotherapy-exposed  
25 children with nonexposed controls. *Am J Obstet Gynecol* 2015;212(5):658 e1-  
26 8. doi: 10.1016/j.ajog.2014.11.032 [published Online First: 2014/12/02]
- 27 53. Svanborg P, Åsberg M. A new self-rating scale for depression and anxiety states based on  
28 the Comprehensive Psychopathological Rating Scale. *Acta Psychiatr Scand*  
29 1994;89(1):21-28. doi: 10.1111/j.1600-0447.1994.tb01480.x
- 30 54. Friedman DD, Beebe B, Jaffe J, et al. Microanalysis of 4-Month Infant Vocal Affect  
31 Qualities and Maternal Postpartum Depression. *Clin Soc Work J* 2010;38(1):8-  
32 16. doi: 10.1007/s10615-010-0261-x
- 33 55. Foukakis T, von Minckwitz G, Bengtsson NO, et al. Effect of Tailored Dose-Dense  
34 Chemotherapy vs Standard 3-Weekly Adjuvant Chemotherapy on Recurrence-  
35 Free Survival Among Women With High-Risk Early Breast Cancer: A  
36 Randomized Clinical Trial. *JAMA* 2016;316(18):1888-96. doi:  
37 10.1001/jama.2016.15865 [published Online First: 2016/11/09]
- 38 56. Gustafsson LL, Wettermark B, Godman B, et al. The 'wise list'- a comprehensive concept  
39 to select, communicate and achieve adherence to recommendations of essential  
40 drugs in ambulatory care in Stockholm. *Basic Clin Pharmacol Toxicol*  
41 2011;108(4):224-33. doi: 10.1111/j.1742-7843.2011.00682.x [published  
42 Online First: 2011/03/19]
- 43 57. Eriksen J, Gustafsson LL, Ateva K, et al. High adherence to the 'Wise List' treatment  
44 recommendations in Stockholm: a 15-year retrospective review of a  
45 multifaceted approach promoting rational use of medicines. *BMJ Open*  
46 2017;7(4):e014345. doi: 10.1136/bmjopen-2016-014345 [published Online  
47 First: 2017/05/04]
- 48 58. Charlton RA, Jordan S, Pierini A, et al. Selective serotonin reuptake inhibitor prescribing  
49 before, during and after pregnancy: a population-based study in six European  
50 regions. *BJOG* 2015;122(7):1010-20. doi: 10.1111/1471-0528.13143
- 51 59. Cleare A, Pariante CM, Young AH, et al. Evidence-based guidelines for treating  
52 depressive disorders with antidepressants: A revision of the 2008 British  
53  
54  
55  
56  
57  
58  
59  
60

- 1  
2  
3 Association for Psychopharmacology guidelines. *J Psychopharmacol*  
4 2015;29(5):459-525. doi: 10.1177/0269881115581093 [published Online First:  
5 2015/05/15]
- 6 60. Oberlander TF, Vigod SN. Developmental Effects of Prenatal Selective Serotonin  
7 Reuptake Inhibitor Exposure in Perspective: Are We Comparing Apples to  
8 Apples? *J Am Acad Child Adolesc Psychiatry* 2016;55(5):351-2. doi:  
9 10.1016/j.jaac.2016.02.012 [published Online First: 2016/04/30]
- 10 61. Coverdale JH, McCullough LB, Chervenak FA. The ethics of randomized placebo-  
11 controlled trials of antidepressants with pregnant women: a systematic review.  
12 *Obstet Gynecol* 2008;112(6):1361-8. doi: 10.1097/AOG.0b013e31818c2a27  
13 [published Online First: 2008/11/28]
- 14 62. Molenaar NM, Brouwer ME, Bockting CL, et al. Stop or go? Preventive cognitive therapy  
15 with guided tapering of antidepressants during pregnancy: study protocol of a  
16 pragmatic multicentre non-inferiority randomized controlled trial. *BMC*  
17 *Psychiatry* 2016;16:72. doi: 10.1186/s12888-016-0752-6 [published Online  
18 First: 2016/03/20]
- 19 63. Chan AW, Tetzlaff JM, Altman DG, et al. SPIRIT 2013 statement: defining standard  
20 protocol items for clinical trials. *Ann Intern Med* 2013;158(3):200-7. doi:  
21 10.7326/0003-4819-158-3-201302050-00583 [published Online First:  
22 2013/01/09]
- 23  
24  
25  
26  
27  
28  
29  
30  
31  
32  
33  
34  
35  
36  
37  
38  
39  
40  
41  
42  
43  
44  
45  
46  
47  
48  
49  
50  
51  
52  
53  
54  
55  
56  
57  
58  
59  
60



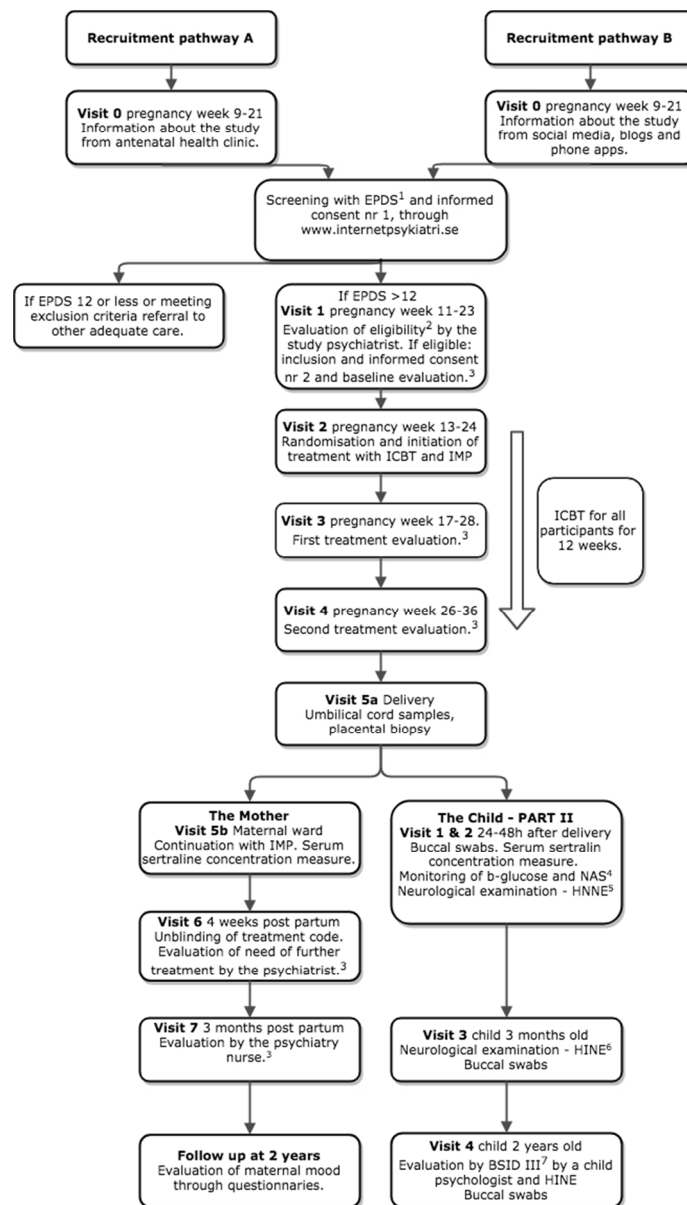

Figure 1. Trial design and participant timeline for the two recruitment pathways. The figure also shows the treatment with placebo/sertraline from visit 2 (pregnancy week 13-24) to visit 6 (4 weeks postpartum) and the ICBT for both groups for 12 weeks, between visit 2 and visit 4 (pregnancy week 26-36) and monitoring of therapy for the two groups. The post-partum follow-up of both mother and child are shown. The different scales and examinations are, as presented in the figure: 1) Edinburgh Postnatal Depression Scale (EPDS)<sup>39</sup>, 2) The diagnose moderate/depression is confirmed according to clinical standard evaluation. Inclusion and exclusion criteria presented in table 1. 3) Evaluation with Montgomery-Åsberg Depression Scale (MADRS)<sup>40</sup>, 4) Modified Finnegan Neonatal Abstinence Scale (NAS)<sup>41</sup>, 5) Hammersmith Neonatal Neurological Examination (HNNE)<sup>42</sup>, 6) Hammersmith Infant Neurological Examination (HINE)<sup>43</sup>, 7) Bayley Scales of Infant and Toddler Development III (BSID III)<sup>44</sup>.

275x403mm (72 x 72 DPI)

1  
2  
3  
4  
5  
6  
7  
8  
9  
10  
11  
12  
13  
14  
15  
16  
17  
18  
19  
20  
21  
22  
23  
24  
25  
26  
27  
28  
29  
30  
31  
32  
33  
34  
35  
36  
37  
38  
39  
40  
41  
42  
43  
44  
45  
46  
47  
48  
49  
50  
51  
52  
53  
54  
55  
56  
57  
58  
59  
60

For peer review only

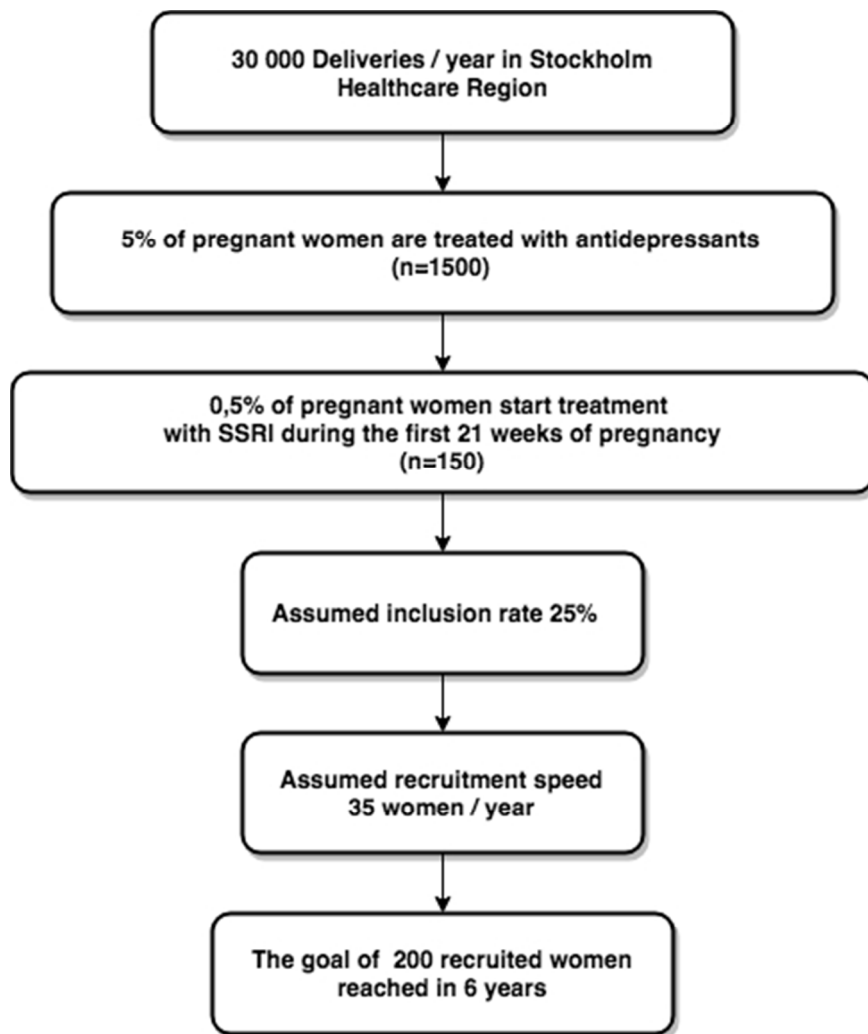

40 Figure 2. The recruitment base in Stockholm Healthcare Region. Numbers based on an analysis of  
41 prescription of SSRI:s in pregnant women in years 2013-2016 in the Stockholm healthcare region with 2,3  
42 million inhabitants Acknowledgements).

43 153x181mm (72 x 72 DPI)

# Reporting checklist for protocol of a clinical trial.

Based on the SPIRIT guidelines.

## Instructions to authors

Complete this checklist by entering the page numbers from your manuscript where readers will find each of the items listed below.

If your work does not currently contain an item consider adding it. If you are certain that an item does not apply to your work, write 'n/a'. If you like, you can provide a short reason.

Upload this checklist as an extra file when you submit to a journal.

In your methods section, say that you used the SPIRIT reporting guidelines, and cite them as:

Chan A-W, Tetzlaff JM, Altman DG, Laupacis A, Gøtzsche PC, Krleža-Jerić K, Hróbjartsson A, Mann H, Dickersin K, Berlin J, Doré C, Parulekar W, Summerskill W, Groves T, Schulz K, Sox H, Rockhold FW, Rennie D, Moher D. SPIRIT 2013 Statement: Defining standard protocol items for clinical trials. *Ann Intern Med.* 2013;158(3):200-207

|                                             |                     | Reporting Item                                                                                               | Page Number |
|---------------------------------------------|---------------------|--------------------------------------------------------------------------------------------------------------|-------------|
| Title                                       | <a href="#">#1</a>  | Descriptive title identifying the study design, population, interventions, and, if applicable, trial acronym | 1, 3        |
| Trial registration                          | <a href="#">#2a</a> | Trial identifier and registry name. If not yet registered, name of intended registry                         | 14          |
| Trial registration: data set                | <a href="#">#2b</a> | All items from the World Health Organization Trial Registration Data Set                                     | 14          |
| Protocol version                            | <a href="#">#3</a>  | Date and version identifier                                                                                  | 14          |
| Funding                                     | <a href="#">#4</a>  | Sources and types of financial, material, and other support                                                  | 13          |
| Roles and responsibilities: contributorship | <a href="#">#5a</a> | Names, affiliations, and roles of protocol contributors                                                      | 13          |
| Roles and responsibilities:                 | <a href="#">#5b</a> | Name and contact information for the trial sponsor                                                           | 1           |

|    |                      |                      |                                                          |        |
|----|----------------------|----------------------|----------------------------------------------------------|--------|
| 1  | sponsor contact      |                      |                                                          |        |
| 2  | information          |                      |                                                          |        |
| 3  |                      |                      |                                                          |        |
| 4  | Roles and            | <a href="#">#5c</a>  | Role of study sponsor and funders, if any, in study      | 13     |
| 5  | responsibilities:    |                      | design; collection, management, analysis, and            |        |
| 6  | sponsor and funder   |                      | interpretation of data; writing of the report; and the   |        |
| 7  |                      |                      | decision to submit the report for publication,           |        |
| 8  |                      |                      | including whether they will have ultimate authority      |        |
| 9  |                      |                      | over any of these activities                             |        |
| 10 |                      |                      |                                                          |        |
| 11 |                      |                      |                                                          |        |
| 12 |                      |                      |                                                          |        |
| 13 |                      |                      |                                                          |        |
| 14 | Roles and            | <a href="#">#5d</a>  | Composition, roles, and responsibilities of the          | 11, 13 |
| 15 | responsibilities:    |                      | coordinating centre, steering committee, endpoint        |        |
| 16 | committees           |                      | adjudication committee, data management team,            |        |
| 17 |                      |                      | and other individuals or groups overseeing the trial,    |        |
| 18 |                      |                      | if applicable (see Item 21a for data monitoring          |        |
| 19 |                      |                      | committee)                                               |        |
| 20 |                      |                      |                                                          |        |
| 21 |                      |                      |                                                          |        |
| 22 |                      |                      |                                                          |        |
| 23 | Background and       | <a href="#">#6a</a>  | Description of research question and justification       | 3      |
| 24 | rationale            |                      | for undertaking the trial, including summary of          |        |
| 25 |                      |                      | relevant studies (published and unpublished)             |        |
| 26 |                      |                      | examining benefits and harms for each intervention       |        |
| 27 |                      |                      |                                                          |        |
| 28 |                      |                      |                                                          |        |
| 29 |                      |                      |                                                          |        |
| 30 | Background and       | <a href="#">#6b</a>  | Explanation for choice of comparators                    | 3      |
| 31 | rationale: choice of |                      |                                                          |        |
| 32 | comparators          |                      |                                                          |        |
| 33 |                      |                      |                                                          |        |
| 34 |                      |                      |                                                          |        |
| 35 | Objectives           | <a href="#">#7</a>   | Specific objectives or hypotheses                        | 4      |
| 36 |                      |                      |                                                          |        |
| 37 |                      |                      |                                                          |        |
| 38 | Trial design         | <a href="#">#8</a>   | Description of trial design including type of trial (eg, | 5      |
| 39 |                      |                      | parallel group, crossover, factorial, single group),     |        |
| 40 |                      |                      | allocation ratio, and framework (eg, superiority,        |        |
| 41 |                      |                      | equivalence, non-inferiority, exploratory)               |        |
| 42 |                      |                      |                                                          |        |
| 43 |                      |                      |                                                          |        |
| 44 |                      |                      |                                                          |        |
| 45 | Study setting        | <a href="#">#9</a>   | Description of study settings (eg, community clinic,     | 5      |
| 46 |                      |                      | academic hospital) and list of countries where data      |        |
| 47 |                      |                      | will be collected. Reference to where list of study      |        |
| 48 |                      |                      | sites can be obtained                                    |        |
| 49 |                      |                      |                                                          |        |
| 50 |                      |                      |                                                          |        |
| 51 | Eligibility criteria | <a href="#">#10</a>  | Inclusion and exclusion criteria for participants. If    | 6      |
| 52 |                      |                      | applicable, eligibility criteria for study centres and   |        |
| 53 |                      |                      | individuals who will perform the interventions (eg,      |        |
| 54 |                      |                      | surgeons, psychotherapists)                              |        |
| 55 |                      |                      |                                                          |        |
| 56 |                      |                      |                                                          |        |
| 57 |                      |                      |                                                          |        |
| 58 | Interventions:       | <a href="#">#11a</a> | Interventions for each group with sufficient detail to   | 7      |
| 59 |                      |                      |                                                          |        |
| 60 |                      |                      |                                                          |        |

|    |                      |                      |                                                       |          |
|----|----------------------|----------------------|-------------------------------------------------------|----------|
| 1  | description          |                      | allow replication, including how and when they will   |          |
| 2  |                      |                      | be administered                                       |          |
| 3  |                      |                      |                                                       |          |
| 4  | Interventions:       | <a href="#">#11b</a> | Criteria for discontinuing or modifying allocated     | 7        |
| 5  | modifications        |                      | interventions for a given trial participant (eg, drug |          |
| 6  |                      |                      | dose change in response to harms, participant         |          |
| 7  |                      |                      | request, or improving / worsening disease)            |          |
| 8  |                      |                      |                                                       |          |
| 9  |                      |                      |                                                       |          |
| 10 | Interventions:       | <a href="#">#11c</a> | Strategies to improve adherence to intervention       | 7        |
| 11 | adherence            |                      | protocols, and any procedures for monitoring          |          |
| 12 |                      |                      | adherence (eg, drug tablet return; laboratory tests)  |          |
| 13 |                      |                      |                                                       |          |
| 14 |                      |                      |                                                       |          |
| 15 |                      |                      |                                                       |          |
| 16 | Interventions:       | <a href="#">#11d</a> | Relevant concomitant care and interventions that      | 6        |
| 17 | concomitant care     |                      | are permitted or prohibited during the trial          |          |
| 18 |                      |                      |                                                       |          |
| 19 |                      |                      |                                                       |          |
| 20 | Outcomes             | <a href="#">#12</a>  | Primary, secondary, and other outcomes, including     | 8        |
| 21 |                      |                      | the specific measurement variable (eg, systolic       |          |
| 22 |                      |                      | blood pressure), analysis metric (eg, change from     |          |
| 23 |                      |                      | baseline, final value, time to event), method of      |          |
| 24 |                      |                      | aggregation (eg, median, proportion), and time        |          |
| 25 |                      |                      | point for each outcome. Explanation of the clinical   |          |
| 26 |                      |                      | relevance of chosen efficacy and harm outcomes is     |          |
| 27 |                      |                      | strongly recommended                                  |          |
| 28 |                      |                      |                                                       |          |
| 29 |                      |                      |                                                       |          |
| 30 |                      |                      |                                                       |          |
| 31 |                      |                      |                                                       |          |
| 32 |                      |                      |                                                       |          |
| 33 | Participant timeline | <a href="#">#13</a>  | Time schedule of enrolment, interventions             | 5 (fig1) |
| 34 |                      |                      | (including any run-ins and washouts),                 |          |
| 35 |                      |                      | assessments, and visits for participants. A           |          |
| 36 |                      |                      | schematic diagram is highly recommended (see          |          |
| 37 |                      |                      | Figure)                                               |          |
| 38 |                      |                      |                                                       |          |
| 39 |                      |                      |                                                       |          |
| 40 |                      |                      |                                                       |          |
| 41 | Sample size          | <a href="#">#14</a>  | Estimated number of participants needed to            | 7        |
| 42 |                      |                      | achieve study objectives and how it was               |          |
| 43 |                      |                      | determined, including clinical and statistical        |          |
| 44 |                      |                      | assumptions supporting any sample size                |          |
| 45 |                      |                      | calculations                                          |          |
| 46 |                      |                      |                                                       |          |
| 47 |                      |                      |                                                       |          |
| 48 |                      |                      |                                                       |          |
| 49 | Recruitment          | <a href="#">#15</a>  | Strategies for achieving adequate participant         | 5        |
| 50 |                      |                      | enrolment to reach target sample size                 |          |
| 51 |                      |                      |                                                       |          |
| 52 |                      |                      |                                                       |          |
| 53 | Allocation:          | <a href="#">#16a</a> | Method of generating the allocation sequence (eg,     | 6        |
| 54 | sequence             |                      | computer-generated random numbers), and list of       |          |
| 55 | generation           |                      | any factors for stratification. To reduce             |          |
| 56 |                      |                      | predictability of a random sequence, details of any   |          |
| 57 |                      |                      |                                                       |          |
| 58 |                      |                      |                                                       |          |
| 59 |                      |                      |                                                       |          |
| 60 |                      |                      |                                                       |          |

planned restriction (eg, blocking) should be provided in a separate document that is unavailable to those who enrol participants or assign interventions

|    |                      |                      |                                                        |
|----|----------------------|----------------------|--------------------------------------------------------|
| 1  |                      |                      |                                                        |
| 2  |                      |                      |                                                        |
| 3  |                      |                      |                                                        |
| 4  |                      |                      |                                                        |
| 5  |                      |                      |                                                        |
| 6  |                      |                      |                                                        |
| 7  | Allocation           | <a href="#">#16b</a> | Mechanism of implementing the allocation               |
| 8  | concealment          |                      | sequence (eg, central telephone; sequentially          |
| 9  | mechanism            |                      | numbered, opaque, sealed envelopes), describing        |
| 10 |                      |                      | any steps to conceal the sequence until                |
| 11 |                      |                      | interventions are assigned                             |
| 12 |                      |                      |                                                        |
| 13 |                      |                      |                                                        |
| 14 |                      |                      |                                                        |
| 15 | Allocation:          | <a href="#">#16c</a> | Who will generate the allocation sequence, who         |
| 16 | implementation       |                      | will enrol participants, and who will assign           |
| 17 |                      |                      | participants to interventions                          |
| 18 |                      |                      |                                                        |
| 19 |                      |                      |                                                        |
| 20 | Blinding (masking)   | <a href="#">#17a</a> | Who will be blinded after assignment to                |
| 21 |                      |                      | interventions (eg, trial participants, care providers, |
| 22 |                      |                      | outcome assessors, data analysts), and how             |
| 23 |                      |                      |                                                        |
| 24 |                      |                      |                                                        |
| 25 |                      |                      |                                                        |
| 26 | Blinding (masking):  | <a href="#">#17b</a> | If blinded, circumstances under which unblinding is    |
| 27 | emergency            |                      | permissible, and procedure for revealing a             |
| 28 | unblinding           |                      | participant's allocated intervention during the trial  |
| 29 |                      |                      |                                                        |
| 30 |                      |                      |                                                        |
| 31 | Data collection plan | <a href="#">#18a</a> | Plans for assessment and collection of outcome,        |
| 32 |                      |                      | baseline, and other trial data, including any related  |
| 33 |                      |                      | processes to promote data quality (eg, duplicate       |
| 34 |                      |                      | measurements, training of assessors) and a             |
| 35 |                      |                      | description of study instruments (eg,                  |
| 36 |                      |                      | questionnaires, laboratory tests) along with their     |
| 37 |                      |                      | reliability and validity, if known. Reference to where |
| 38 |                      |                      | data collection forms can be found, if not in the      |
| 39 |                      |                      | protocol                                               |
| 40 |                      |                      |                                                        |
| 41 |                      |                      |                                                        |
| 42 |                      |                      |                                                        |
| 43 |                      |                      |                                                        |
| 44 |                      |                      |                                                        |
| 45 | Data collection      | <a href="#">#18b</a> | Plans to promote participant retention and             |
| 46 | plan: retention      |                      | complete follow-up, including list of any outcome      |
| 47 |                      |                      | data to be collected for participants who              |
| 48 |                      |                      | discontinue or deviate from intervention protocols     |
| 49 |                      |                      |                                                        |
| 50 |                      |                      |                                                        |
| 51 |                      |                      |                                                        |
| 52 | Data management      | <a href="#">#19</a>  | Plans for data entry, coding, security, and storage,   |
| 53 |                      |                      | including any related processes to promote data        |
| 54 |                      |                      | quality (eg, double data entry; range checks for       |
| 55 |                      |                      | data values). Reference to where details of data       |
| 56 |                      |                      | management procedures can be found, if not in the      |
| 57 |                      |                      |                                                        |
| 58 |                      |                      |                                                        |
| 59 |                      |                      |                                                        |
| 60 |                      |                      |                                                        |



|    |                        |                                                                             |      |
|----|------------------------|-----------------------------------------------------------------------------|------|
|    |                        | protocol                                                                    |      |
| 1  |                        |                                                                             |      |
| 2  | Statistics: outcomes   | <a href="#">#20a</a> Statistical methods for analysing primary and          | 9-10 |
| 3  |                        | secondary outcomes. Reference to where other                                |      |
| 4  |                        | details of the statistical analysis plan can be found,                      |      |
| 5  |                        | if not in the protocol                                                      |      |
| 6  |                        |                                                                             |      |
| 7  |                        |                                                                             |      |
| 8  |                        |                                                                             |      |
| 9  | Statistics: additional | <a href="#">#20b</a> Methods for any additional analyses (eg, subgroup      | 9-10 |
| 10 | analyses               | and adjusted analyses)                                                      |      |
| 11 |                        |                                                                             |      |
| 12 |                        |                                                                             |      |
| 13 | Statistics: analysis   | <a href="#">#20c</a> Definition of analysis population relating to protocol | 9-10 |
| 14 | population and         | non-adherence (eg, as randomised analysis), and                             |      |
| 15 | missing data           | any statistical methods to handle missing data (eg,                         |      |
| 16 |                        | multiple imputation)                                                        |      |
| 17 |                        |                                                                             |      |
| 18 |                        |                                                                             |      |
| 19 |                        |                                                                             |      |
| 20 | Data monitoring:       | <a href="#">#21a</a> Composition of data monitoring committee (DMC);        | 11   |
| 21 | formal committee       | summary of its role and reporting structure;                                |      |
| 22 |                        | statement of whether it is independent from the                             |      |
| 23 |                        | sponsor and competing interests; and reference to                           |      |
| 24 |                        | where further details about its charter can be                              |      |
| 25 |                        | found, if not in the protocol. Alternatively, an                            |      |
| 26 |                        | explanation of why a DMC is not needed                                      |      |
| 27 |                        |                                                                             |      |
| 28 |                        |                                                                             |      |
| 29 |                        |                                                                             |      |
| 30 |                        |                                                                             |      |
| 31 | Data monitoring:       | <a href="#">#21b</a> Description of any interim analyses and stopping       | 11   |
| 32 | interim analysis       | guidelines, including who will have access to these                         |      |
| 33 |                        | interim results and make the final decision to                              |      |
| 34 |                        | terminate the trial                                                         |      |
| 35 |                        |                                                                             |      |
| 36 |                        |                                                                             |      |
| 37 |                        |                                                                             |      |
| 38 | Harms                  | <a href="#">#22</a> Plans for collecting, assessing, reporting, and         | 10   |
| 39 |                        | managing solicited and spontaneously reported                               |      |
| 40 |                        | adverse events and other unintended effects of trial                        |      |
| 41 |                        | interventions or trial conduct                                              |      |
| 42 |                        |                                                                             |      |
| 43 |                        |                                                                             |      |
| 44 |                        |                                                                             |      |
| 45 | Auditing               | <a href="#">#23</a> Frequency and procedures for auditing trial             | 10   |
| 46 |                        | conduct, if any, and whether the process will be                            |      |
| 47 |                        | independent from investigators and the sponsor                              |      |
| 48 |                        |                                                                             |      |
| 49 |                        |                                                                             |      |
| 50 | Research ethics        | <a href="#">#24</a> Plans for seeking research ethics committee /           | 13   |
| 51 | approval               | institutional review board (REC / IRB) approval                             |      |
| 52 |                        |                                                                             |      |
| 53 |                        |                                                                             |      |
| 54 | Protocol               | <a href="#">#25</a> Plans for communicating important protocol              | 13   |
| 55 | amendments             | modifications (eg, changes to eligibility criteria,                         |      |
| 56 |                        | outcomes, analyses) to relevant parties (eg,                                |      |
| 57 |                        | investigators, REC / IRBs, trial participants, trial                        |      |
| 58 |                        |                                                                             |      |
| 59 |                        |                                                                             |      |
| 60 |                        |                                                                             |      |

|    |                       |                                                                            |                     |
|----|-----------------------|----------------------------------------------------------------------------|---------------------|
| 1  |                       | registries, journals, regulators)                                          |                     |
| 2  | Consent or assent     | <a href="#">#26a</a> Who will obtain informed consent or assent from       | 5, fig1             |
| 3  |                       | potential trial participants or authorised surrogates,                     |                     |
| 4  |                       | and how (see Item 32)                                                      |                     |
| 5  |                       |                                                                            |                     |
| 6  |                       |                                                                            |                     |
| 7  | Consent or assent:    | <a href="#">#26b</a> Additional consent provisions for collection and use  | n/a                 |
| 8  | ancillary studies     | of participant data and biological specimens in                            |                     |
| 9  |                       | ancillary studies, if applicable                                           |                     |
| 10 |                       |                                                                            |                     |
| 11 |                       |                                                                            |                     |
| 12 | Confidentiality       | <a href="#">#27</a> How personal information about potential and           | 9                   |
| 13 |                       | enrolled participants will be collected, shared, and                       |                     |
| 14 |                       | maintained in order to protect confidentiality before,                     |                     |
| 15 |                       | during, and after the trial                                                |                     |
| 16 |                       |                                                                            |                     |
| 17 |                       |                                                                            |                     |
| 18 |                       |                                                                            |                     |
| 19 | Declaration of        | <a href="#">#28</a> Financial and other competing interests for            | 13                  |
| 20 | interests             | principal investigators for the overall trial and each                     |                     |
| 21 |                       | study site                                                                 |                     |
| 22 |                       |                                                                            |                     |
| 23 |                       |                                                                            |                     |
| 24 | Data access           | <a href="#">#29</a> Statement of who will have access to the final trial   | 9                   |
| 25 |                       | dataset, and disclosure of contractual agreements                          |                     |
| 26 |                       | that limit such access for investigators                                   |                     |
| 27 |                       |                                                                            |                     |
| 28 |                       |                                                                            |                     |
| 29 |                       |                                                                            |                     |
| 30 | Ancillary and post    | <a href="#">#30</a> Provisions, if any, for ancillary and post-trial care, | 6                   |
| 31 | trial care            | and for compensation to those who suffer harm                              |                     |
| 32 |                       | from trial participation                                                   |                     |
| 33 |                       |                                                                            |                     |
| 34 |                       |                                                                            |                     |
| 35 | Dissemination         | <a href="#">#31a</a> Plans for investigators and sponsor to                | 11                  |
| 36 | policy: trial results | communicate trial results to participants,                                 |                     |
| 37 |                       | healthcare professionals, the public, and other                            |                     |
| 38 |                       | relevant groups (eg, via publication, reporting in                         |                     |
| 39 |                       | results databases, or other data sharing                                   |                     |
| 40 |                       | arrangements), including any publication                                   |                     |
| 41 |                       | restrictions                                                               |                     |
| 42 |                       |                                                                            |                     |
| 43 |                       |                                                                            |                     |
| 44 |                       |                                                                            |                     |
| 45 |                       |                                                                            |                     |
| 46 | Dissemination         | <a href="#">#31b</a> Authorship eligibility guidelines and any intended    | Use of              |
| 47 | policy: authorship    | use of professional writers                                                | professional        |
| 48 |                       |                                                                            | writers not         |
| 49 |                       |                                                                            | intended            |
| 50 |                       |                                                                            |                     |
| 51 |                       |                                                                            |                     |
| 52 |                       |                                                                            |                     |
| 53 | Dissemination         | <a href="#">#31c</a> Plans, if any, for granting public access to the full | Publication of full |
| 54 | policy: reproducible  | protocol, participant-level dataset, and statistical                       | protocol possibly   |
| 55 | research              | code                                                                       | with this           |
| 56 |                       |                                                                            | manuscript.         |
| 57 |                       |                                                                            |                     |
| 58 |                       |                                                                            |                     |
| 59 |                       |                                                                            |                     |
| 60 |                       |                                                                            |                     |

|                                       |                            |                     |                                                                                                                                                                                                |                                                                    |
|---------------------------------------|----------------------------|---------------------|------------------------------------------------------------------------------------------------------------------------------------------------------------------------------------------------|--------------------------------------------------------------------|
| 1<br>2<br>3<br>4<br>5<br>6<br>7<br>8  | Informed consent materials | <a href="#">#32</a> | Model consent form and other related documentation given to participants and authorised surrogates                                                                                             | Are attached. English translations can be published as appendices. |
| 9<br>10<br>11<br>12<br>13<br>14<br>15 | Biological specimens       | <a href="#">#33</a> | Plans for collection, laboratory evaluation, and storage of biological specimens for genetic or molecular analysis in the current trial and for future use in ancillary studies, if applicable | 9                                                                  |

16 The SPIRIT checklist is distributed under the terms of the Creative Commons Attribution License CC-  
17 BY-ND 3.0. This checklist can be completed online using <http://www.goodreports.org/>, a tool made by  
18 the [EQUATOR Network](#) in collaboration with [Penelope.ai](#)  
19  
20  
21  
22  
23  
24  
25  
26  
27  
28  
29  
30  
31  
32  
33  
34  
35  
36  
37  
38  
39  
40  
41  
42  
43  
44  
45  
46  
47  
48  
49  
50  
51  
52  
53  
54  
55  
56  
57  
58  
59  
60

# BMJ Open

## MAGDALENA: Study protocol of a randomised, placebo-controlled trial on cognitive development at two years of age in children exposed to SSRI in utero.

|                               |                                                                                                                                                                                                                                                                                                                                                                                                                                                                                                                                                                                                                                                                                                                                                                                                                                                                                                                                                                                                                                                                                                                                                                                                                                                                                                                                                                                                                                                                                                                                                                                                                                                                                                                                                                                                                                                                                                                                                                                                                                                                                                                                                                                                                                                                                                                 |
|-------------------------------|-----------------------------------------------------------------------------------------------------------------------------------------------------------------------------------------------------------------------------------------------------------------------------------------------------------------------------------------------------------------------------------------------------------------------------------------------------------------------------------------------------------------------------------------------------------------------------------------------------------------------------------------------------------------------------------------------------------------------------------------------------------------------------------------------------------------------------------------------------------------------------------------------------------------------------------------------------------------------------------------------------------------------------------------------------------------------------------------------------------------------------------------------------------------------------------------------------------------------------------------------------------------------------------------------------------------------------------------------------------------------------------------------------------------------------------------------------------------------------------------------------------------------------------------------------------------------------------------------------------------------------------------------------------------------------------------------------------------------------------------------------------------------------------------------------------------------------------------------------------------------------------------------------------------------------------------------------------------------------------------------------------------------------------------------------------------------------------------------------------------------------------------------------------------------------------------------------------------------------------------------------------------------------------------------------------------|
| Journal:                      | <i>BMJ Open</i>                                                                                                                                                                                                                                                                                                                                                                                                                                                                                                                                                                                                                                                                                                                                                                                                                                                                                                                                                                                                                                                                                                                                                                                                                                                                                                                                                                                                                                                                                                                                                                                                                                                                                                                                                                                                                                                                                                                                                                                                                                                                                                                                                                                                                                                                                                 |
| Manuscript ID                 | bmjopen-2018-023281.R1                                                                                                                                                                                                                                                                                                                                                                                                                                                                                                                                                                                                                                                                                                                                                                                                                                                                                                                                                                                                                                                                                                                                                                                                                                                                                                                                                                                                                                                                                                                                                                                                                                                                                                                                                                                                                                                                                                                                                                                                                                                                                                                                                                                                                                                                                          |
| Article Type:                 | Protocol                                                                                                                                                                                                                                                                                                                                                                                                                                                                                                                                                                                                                                                                                                                                                                                                                                                                                                                                                                                                                                                                                                                                                                                                                                                                                                                                                                                                                                                                                                                                                                                                                                                                                                                                                                                                                                                                                                                                                                                                                                                                                                                                                                                                                                                                                                        |
| Date Submitted by the Author: | 12-Jun-2018                                                                                                                                                                                                                                                                                                                                                                                                                                                                                                                                                                                                                                                                                                                                                                                                                                                                                                                                                                                                                                                                                                                                                                                                                                                                                                                                                                                                                                                                                                                                                                                                                                                                                                                                                                                                                                                                                                                                                                                                                                                                                                                                                                                                                                                                                                     |
| Complete List of Authors:     | <p>Heinonen, Essi; Karolinska institutet Department of Clinical Sciences Intervention and Technology, Pediatrics; Karolinska Universitetssjukhuset, Paediatrics</p> <p>Szymanska - von Schultz, Barbara; Karolinska Institutet, Department of Clinical Science, Intervention and Technology, Division of Obstetrics and Gynaecology, ; Karolinska Universitetssjukhuset, Obstetrics and Gynaecology</p> <p>Kaldo, V; Karolinska Institutet, Centre for Psychiatry Research, Department of Clinical Neuroscience, ; Linnaeus University, Department of Psychology, Faculty of Health and Life Sciences</p> <p>Nasiell, Josefine; Karolinska Institutet, Department of Clinical Science, Intervention and Technology, Division of Obstetrics and Gynaecology; Karolinska Universitetssjukhuset, Obstetrics and Gynaecology</p> <p>Andersson, Ewa; Karolinska Institutet, Department of Women 's and Children 's Health</p> <p>Bergmark, Mikaela; Stockholm Healthcare Region, Psychiatry South West Blomdahl-Wetterholm, Margareta; Stockholm Healthcare Region, Psychiatry South West</p> <p>Forsberg, Lisa; Karolinska institutet Department of Clinical Sciences Intervention and Technology, Pediatrics; Karolinska Universitetssjukhuset, Paediatrics</p> <p>Forsell, Erik; Karolinska Institutet Department of Clinical Neuroscience, Centre for Psychiatry Research; Stockholm Healthcare Region, Psychiatry South West</p> <p>Forsgren, Anna; Karolinska institutet Department of Clinical Sciences Intervention and Technology, Pediatrics</p> <p>Frööjd, Sandra; Stockholm Healthcare Region, Psychiatry South West</p> <p>Goldman, Amy; Stockholm Healthcare Region, Psychiatry South West</p> <p>Nordenadler, Eva-Marie; Stockholm Healthcare Region, Psychiatry South West</p> <p>Sklivanioti, Myrto; Stockholm Healthcare Region, Psychiatry South West</p> <p>Blennow, Mats; Karolinska Institutet, Department of Clinical Science, Intervention and Technology; Karolinska Universitetssjukhuset, Paediatrics</p> <p>Wide, Katarina; Karolinska Institutet, Department of Clinical Science, Intervention and Technology, Division of Paediatrics; Karolinska Universitetssjukhuset, Paediatrics</p> <p>Gustafsson, Lars; Division of Clinical Pharmacology, Department of Laboratory medicine</p> |
| <b>Primary Subject            | Mental health                                                                                                                                                                                                                                                                                                                                                                                                                                                                                                                                                                                                                                                                                                                                                                                                                                                                                                                                                                                                                                                                                                                                                                                                                                                                                                                                                                                                                                                                                                                                                                                                                                                                                                                                                                                                                                                                                                                                                                                                                                                                                                                                                                                                                                                                                                   |

1  
2  
3  
4  
5  
6  
7  
8  
9  
10  
11  
12  
13  
14  
15  
16  
17  
18  
19  
20  
21  
22  
23  
24  
25  
26  
27  
28  
29  
30  
31  
32  
33  
34  
35  
36  
37  
38  
39  
40  
41  
42  
43  
44  
45  
46  
47  
48  
49  
50  
51  
52  
53  
54  
55  
56  
57  
58  
59  
60

|                            |                                                                                                                                               |
|----------------------------|-----------------------------------------------------------------------------------------------------------------------------------------------|
| Heading                    |                                                                                                                                               |
| Secondary Subject Heading: | Obstetrics and gynaecology, Pharmacology and therapeutics, Paediatrics                                                                        |
| Keywords:                  | Antenatal depression, Internet-Based Cognitive Behaviour Therapy, Serotonin Reuptake Inhibitors, Neurodevelopment, Pregnancy, Drug Metabolism |
|                            |                                                                                                                                               |

SCHOLARONE™  
Manuscripts

For peer review only

# MAGDALENA: Study protocol of a randomised, placebo-controlled trial on cognitive development at two years of age in children exposed to SSRI in utero.

**Heinonen E**<sup>1,2</sup> [essi.heinonen@ki.se](mailto:essi.heinonen@ki.se), **Szymanska-von Schultz B**<sup>3,4</sup> [barbara.szymanska-vonschultz@sll.se](mailto:barbara.szymanska-vonschultz@sll.se), **Kaldo V**<sup>5,6,7</sup> [viktor.kaldo@ki.se](mailto:viktor.kaldo@ki.se), **Nasiell J**<sup>3,4</sup> [josefine.nasiell@ki.se](mailto:josefine.nasiell@ki.se), **Andersson E**<sup>8</sup> [ewa.andersson@ki.se](mailto:ewa.andersson@ki.se), **Bergmark M**<sup>6</sup> [mikaelabergmark@gmail.com](mailto:mikaelabergmark@gmail.com), **Blomdahl-Wetterholm M**<sup>6</sup> [margareta.blomdahl-wetterholm@sll.se](mailto:margareta.blomdahl-wetterholm@sll.se), **Forsberg L**<sup>1,2</sup> [lisa.forsberg.l@ki.se](mailto:lisa.forsberg.l@ki.se), **Forsell E**<sup>5,6</sup> [erik.forsell@ki.se](mailto:erik.forsell@ki.se), **Forsgren A**<sup>1</sup> [anna.forsgren@ki.se](mailto:anna.forsgren@ki.se), **Frööjd S**<sup>6</sup> [sandra.froojd@gmail.com](mailto:sandra.froojd@gmail.com), **Goldman A**<sup>6</sup> [amy.goldman@sll.se](mailto:amy.goldman@sll.se), **Nordenadler EM**<sup>6</sup> [eva-mari.nordenadler@sll.se](mailto:eva-mari.nordenadler@sll.se), **Sklivanioti M**<sup>6</sup> [myrto.sklivanioti@sll.se](mailto:myrto.sklivanioti@sll.se), **Blennow M**<sup>1,2</sup> [mats.blennow@ki.se](mailto:mats.blennow@ki.se), **Wide K**<sup>1,2</sup> [katarina.wide@ki.se](mailto:katarina.wide@ki.se), **Gustafsson LL**<sup>9,10</sup> [lars-l.gustafsson@ki.se](mailto:lars-l.gustafsson@ki.se)

**Division of Paediatrics, Department of Clinical Science, Intervention and Technology (CLINTEC), Karolinska Institutet, Stockholm<sup>1</sup>, Department of Paediatrics at Karolinska University Hospital, Stockholm<sup>2</sup>, Division of Obstetrics and Gynaecology, Department of Clinical Science, Intervention and Technology (CLINTEC), Karolinska Institutet, Stockholm<sup>3</sup>, Department of Obstetrics and Gynaecology at Karolinska University Hospital, Stockholm<sup>4</sup>, Centre for Psychiatry Research, Department of Clinical Neuroscience, Karolinska Institutet, Stockholm<sup>5</sup>, Psychiatry South West, Stockholm Health Care Region<sup>6</sup>, Department of Psychology, Faculty of Health and Life Sciences, Linnaeus University, Växjö<sup>7</sup>, Department of Women's and Children's Health, Karolinska Institutet, Stockholm<sup>8</sup>, Division of Clinical Pharmacology, Department of Laboratory Medicine, Karolinska Institutet, Stockholm<sup>9</sup>, Department of Clinical Pharmacology, Karolinska University Hospital, Stockholm<sup>10</sup>.**

**Corresponding author:** Essi Heinonen, Division of Paediatrics, Department of Clinical Science, Intervention and Technology (CLINTEC), Karolinska Institutet, Stockholm. Blickagången 6A, 14157 Huddinge, Sweden. [essi.heinonen@ki.se](mailto:essi.heinonen@ki.se), +4673-563 3330.

**Sponsor:** Mats Blennow, Division of Paediatrics, Department of Clinical Science, Intervention and Technology (CLINTEC), Karolinska Institutet, Stockholm. Blickagången 6A, 14157 Huddinge, Sweden. [mats.blennow@ki.se](mailto:mats.blennow@ki.se), +4670-003 8906

## ABSTRACT

### Introduction

Ten percent of all pregnant women are depressed. Standard therapy of pregnant women with moderate depression is Selective Serotonin Reuptake Inhibitors (SSRI). Observational studies on neurodevelopment after fetal SSRI exposure show conflicting results. Our primary objective is to compare the cognitive development in children exposed to sertraline and maternal depression with those exposed to maternal depression and placebo *in utero*. We

1  
2  
3 hypothesize that there is a significant neurodevelopmental differences between the groups. As  
4 a secondary objective we study the add-on effect of sertraline to Internet-based Cognitive  
5 Behaviour Therapy (ICBT) to treat moderate depression during pregnancy.  
6

## 7 **Methods and analysis**

8  
9 MAGDALENA is a randomised, placebo-controlled, double-blinded trial in Stockholm  
10 Healthcare region with 2.3 million inhabitants. The women are recruited in week 9-21 of  
11 pregnancy either through Antenatal Health Clinics or through social media. They are to be  
12 diagnosed with moderate depression without ongoing antidepressive therapy or any serious  
13 comorbidity. The women in the intervention arm receive sertraline combined with a twelve-  
14 week period of ICBT, the control arm is treated with placebo and ICBT. We assess the  
15 cognitive development in the offspring at the age of 2 using Bayley Scales of Infant and  
16 Toddler Development<sup>®</sup>, 3<sup>rd</sup> edition (BSID-III<sup>®</sup>). We aim at recruiting 200 women, 100  
17 women in each treatment arm, to ensure statistical power to detect a clinically relevant  
18 difference between the groups.  
19  
20

## 21 **Ethics and dissemination**

22  
23 This randomised trial will provide long sought evidence about the effects of SSRI and  
24 maternal depression during pregnancy on the neurodevelopment in the offspring. The study is  
25 approved by the Regional Ethical Review Board at Karolinska Institutet in Stockholm and the  
26 Swedish Medical Products Agency. It is registered with the European Clinical Trials  
27 Database (EudraCT), Number: 2013-004444-31. Results will be disseminated at scientific  
28 conferences, published in peer-reviewed journals, and made available to the public.  
29  
30  
31  
32  
33

34 **Key Words:** Antenatal depression, Drug metabolism, Infant, Internet-based Cognitive  
35 behaviour therapy, Neurodevelopment, Pregnancy, Randomised controlled trial, Serotonin  
36 Reuptake Inhibitors,  
37  
38  
39  
40

## 41 **Article Summary**

### 42 **Strengths and limitations of this study**

43  
44 + To our knowledge, this is the first randomised controlled trial to separate the  
45 neurodevelopmental effects of fetal SSRI exposure from the possible effects from the  
46 underlying maternal depression. We consider that a randomised controlled trial is the most  
47 valid method to find answers to this complex question.  
48  
49  
50

51 + The highly structured and homogenous nature of the ICBT given to both groups reduces the  
52 risk of confounding by therapist factors and should make the add-on effects of sertraline  
53 clear-cut.  
54  
55  
56  
57  
58  
59  
60



1  
2  
3 - The ICBT protocol is in Swedish only and cannot be performed with an interpreter which  
4 requires Swedish literacy. Therefore the generalizability of our study results is reduced and  
5 the recruitment potential limited in multicultural areas.

6  
7 - The severity of depression is monitored with MADRS, which contains items that can be  
8 related both to depression and to pregnancy which complicates the interpretation of the  
9 results.

10  
11 - Due to the evaluation at 2 years of age, we cannot answer the question about autism, since it  
12 is not easily diagnosed at this early age. We plan to follow up our cohort long-term.  
13  
14

15  
16  
17 **Word Count:** 5670 words (Excluding title page, abstract, figures, tables, declarations and  
18 references.) Abstract 298 words.  
19

## 20 21 22 23 **Introduction**

### 24 25 **Background**

26  
27 Although approximately ten percent of pregnant women are depressed, the prescription-rate  
28 of antidepressants decreases during pregnancy as compared to the preceding months<sup>1-3</sup>  
29 Untreated prenatal depression is associated with pregnancy complications such as  
30 preeclampsia<sup>4</sup>, low birth weight and prematurity<sup>5</sup> and increased plasma levels of stress  
31 hormones in the pregnant woman and the neonate.<sup>6,7</sup> Published data shows, that 2,4% of  
32 pregnant women in Sweden during years 2006-2012<sup>8</sup> and 6% of the ones in USA during the  
33 years 2001-2013<sup>9</sup> were treated with SSRIs. Our own unpublished data of prescriptions for  
34 Stockholm Healthcare Region extracted from the Swedish Drug Registry shows, that this  
35 percentage is constant at 5% in pregnant women in Stockholm during the period 2014 to  
36 2016. Increased risk for SSRI-related birth-defects has not been reported for most SSRIs  
37 except that fluoxetine and paroxetine seem to be associated with a small increase in the risk  
38 for heart defects.<sup>10</sup>  
39  
40

41 The question if fetal SSRI exposure causes long-term neurodevelopmental effects remains  
42 unanswered.<sup>11</sup> Observational studies have reported a twofold increased risk for autism  
43 spectrum disorder (ASD),<sup>12-15</sup> but recently two large register studies explained this increase  
44 by confounding factors, emphasizing the role of genetic and social factors as opposed to drug  
45 exposure alone.<sup>16,17</sup> A recent review also concluded, that the increase was not significant  
46 when comparing to women with previous affective disease or in sibling studies.<sup>18</sup> To our  
47 knowledge, there is no previous randomised controlled trial in this field.  
48  
49

50 Our main objective is to clarify the cognitive effects on the children by pursuing a  
51 randomised, controlled, double blind study. We compare the cognitive development at two  
52 years of age in children to women with moderate depression during pregnancy, treated with  
53 either Internet-based Cognitive Behaviour therapy (ICBT) and sertraline (a SSRI compound)  
54 or ICBT and placebo. The Swedish acronym of the study, MAGDALENA, reflects this main  
55 objective: "*Maternal Affective Disease during Pregnancy: Depression and Antidepressant*  
56  
57  
58  
59

## *Drugs and Effects on the Neurological Development and Adaptation”.*

Our secondary objective is to understand the add-on effect of sertraline to Internet-based Cognitive Behaviour Therapy (ICBT), a web-based self-treatment program with active therapist support over the internet. ICBT is a well-documented treatment for depression used in regular psychiatric care.<sup>19</sup> It has been shown that pregnant women feel that psychotherapy needs to take the special case of being pregnant into account to be credible and engaging.<sup>20</sup> Postpartum depression has been targeted in online trials,<sup>20-23</sup> but not antenatal depression. Because of this, we developed an ICBT program to be useful for treatment of antenatal depression based on the ICBT for depression used at our Internet Psychiatry Clinic. The modified ICBT was tested in a pilot RCT with good results. The effect size compared to regular maternity care was of clinical importance and significant, (Hedges  $g=1.21$ ,  $p<.001$ )<sup>24</sup> The Swedish guidelines state that mild and moderate depression should primarily be treated with psychotherapy or antidepressants. Cognitive behaviour therapy and interpersonal therapy are recommended as the first choice of therapy. Severe depression should be treated with antidepressants or electroconvulsive therapy (ECT). The recommendation does not give guidance on the value of combination therapies for any level of depression.<sup>25</sup> Combination therapy with CBT and antidepressants appear more effective than antidepressant therapy alone in treatment of major depression,<sup>26</sup> but this has not been studied in pregnant women. Given the *in-utero* effects of untreated depression during pregnancy,<sup>7</sup> it might be rational with a dual treatment to achieve prompt symptom reduction. The effects of ICBT are comparable to the effects seen with traditional CBT, hence having the potential to be a cost-effective and accessible treatment alternative.<sup>19,24,27,28</sup> Our large group of patients and unique design with and without sertraline treatment allows us also to pursue exploratory tertiary studies in the pregnant women and in the newborns.<sup>29,30</sup>

## **Objectives**

### **Primary and secondary objectives**

Our primary objective is to study cognitive development at 2 years of age in children prenatally exposed to moderate maternal depression treated either with sertraline and ICBT (Intervention) or with ICBT and placebo (Control). Our hypothesis is that there is a significant neurodevelopmental difference between 2 year old children exposed to the intervention treatment (sertraline) as compared to the control treatment, measured with established scoring methods. If no difference is detected we will include a non-inferiority analysis to test if the neurodevelopment in the exposed group is at least as good as for the control group of children.

Our secondary objective is to evaluate the add-on effect of treatment with sertraline to an ICBT-program for antenatal depression. Our hypothesis is that sertraline provides a significant add-on effect to ICBT-therapy.

### **Exploratory tertiary objectives**

The large material and unique design with one SSRI-exposed and one placebo-treated arm allows exploratory studies on tertiary aspects related to physiological and adaptive changes in

depressed pregnant women and in their newborns. We will study the risk of preeclampsia, bleeding and caesarean section and potential changes of biochemical parameters and hormones during the course of pregnancy in the two study groups.<sup>4,31-33</sup> Paediatric exploratory objectives include clarification of type and prevalence of signs and symptoms of neonatal maladaptation and risk of admission to a neonatal care unit. The design allows a subgroup study of maternal-fetal attachment and bonding style differences between the groups.<sup>34</sup>

We will explore interindividual variation in sertraline pharmacokinetics during and after pregnancy and in newborns and how it might relate to different genetic variants of drug metabolizing enzymes in pregnant women and newborns.<sup>35-37</sup> Likewise we will explore the epigenetic differences between the groups in mothers and newborns.<sup>38</sup>

## Methods and analysis

### Trial design and setting

The MAGDALENA Study is a prospective, randomised, placebo controlled, double blinded, single centred, clinical investigation of pregnant women with moderate depression recruited from the Stockholm catchment area (2.3 million inhabitants and 28000 deliveries annually) with multiple delivery units. The study group receives sertraline (or placebo) clinically titrated to a maximum daily dose of 150 mg. The study and control groups are both treated with ICBT.<sup>24</sup> The trial design includes two different recruitment pathways (A and B) (Figure 1). The primary outcome is achieved with scoring of the neurodevelopment of the child at 2 years of age. The framework for neurodevelopment is primarily a superiority test. The add-on effect of SSRI to ICBT is also a superiority test. The tertiary objectives are exploratory.

**Figure 1.** Trial design and participant timeline for the two recruitment pathways. The figure also shows the treatment with placebo/sertraline from visit 2 (pregnancy week 13-24) to visit 6 (4 weeks postpartum) and the ICBT for both groups for 12 weeks, between visit 2 and visit 4 (pregnancy week 26-36) and monitoring of therapy for the two groups. The post-partum follow-up of both mother and child are shown. The different scales and examinations are, as presented in the figure: 1) Edinburgh Postnatal Depression Scale (EPDS)<sup>39</sup>, 2) Diagnosis of moderate depression is confirmed according to clinical standard evaluation. Inclusion and exclusion criteria presented in table 1. 3) Evaluation with Montgomery-Åsberg Depression Scale (MADRS)<sup>40</sup>, 4) Modified Finnegan Neonatal Abstinence Scale (NAS)<sup>41</sup>, 5) Hammersmith Neonatal Neurological Examination (HNNE)<sup>42</sup>, 6) Hammersmith Infant Neurological Examination (HINE)<sup>43</sup>, 7) Bayley Scales of Infant and Toddler Development III<sup>®</sup> (BSID III<sup>®</sup>)<sup>44</sup>.

### Recruitment and blinding

Pregnant women are recruited either from the antenatal health clinics (Figure 1, Pathway A) or through social media and our study website [www.magdalenastudien.se](http://www.magdalenastudien.se) (Figure 1, Pathway B). Pregnant women visit their midwives at the antenatal clinics, commonly with their partners, around ten times during pregnancy free of charge. In pathway A, the midwives

1  
2  
3 inform about the study at a regular visit. The recruitment through the study website, pathway  
4 B, is simplified by informing about the study to potential subjects continuously through social  
5 media, pregnancy related information platforms, different blogs and podcasts. Smartphone  
6 pregnancy applications are popular, reaching about 75% of pregnant women in cross-sectional  
7 studies in English and Spanish speaking countries. We assume similar, if not higher, usage in  
8 Sweden.<sup>45,46</sup> In both pathways, the women are directed our study platform at the internet  
9 psychiatry website, [www.internetpsykiatri.se](http://www.internetpsykiatri.se). They are asked to fill the Edinburgh Postnatal  
10 Depression Scale (EPDS)<sup>39</sup> self-test to assess the degree of depressive symptoms as well as to  
11 sign the first informed consent form. Regardless of recruitment pathway, the women will  
12 continue their regular visits at their home antenatal clinic.  
13  
14

15 We have chosen 13 or more points on the EPDS for further evaluation of eligibility for the  
16 study. The reason is that it has been found to be the optimal cut-off point with 77% sensitivity  
17 and 94% specificity for detection of depressive symptoms during pregnancy.<sup>39</sup> The subjects  
18 scoring 13 points or more on the EPDS self-test and lacking exclusion criteria are scheduled  
19 to meet one of our three study psychiatrists for clinical evaluation, including SCID-I directed  
20 interview (Structured Clinical Interview for DSM IV axis I disorders)<sup>47</sup>, review of eligibility  
21 criteria and signing of the final informed consent form. (Visit 1, Fig.1, Table 1). The included  
22 women are allocated to the next consecutive patient number and randomised to treatment by  
23 Karolinska Trial Alliance (KTA), see below. The KTA will also ensure correct blinding for  
24 all trial participants, care providers, outcome assessors and data analysts, including labelling  
25 of the study drug packages. The drug treatment with study drug (sertraline or placebo) is  
26 initiated after visit 2 (Fig.1). At the same time, the women start ICBT treatment using the  
27 internet psychiatry website.<sup>19,24</sup> Both study and control groups receive capsules of identical  
28 appearance and packing (See below). The treatment code is broken and a new clinical  
29 evaluation is performed by the study psychiatrist one month after the delivery. The treatment  
30 will be continued for one year after the delivery for all patients in the active treatment arm.  
31 The women in the placebo group that haven't reached remission will also be offered treatment  
32 with SSRI. Both the women and the psychiatrist are forbidden to inform anyone in the study  
33 about which group they have belonged to, to ensure the continued blinding of the study. This  
34 is particularly important regarding the paediatricians and paediatric psychologists assessing  
35 the children.  
36  
37  
38  
39  
40  
41  
42  
43  
44  
45  
46  
47  
48  
49  
50  
51  
52  
53  
54  
55  
56  
57  
58  
59  
60

|                    |                                                                                                                                                                                                                                                                                                                                                                                                                                                                                                                                                                                                                                                                                |
|--------------------|--------------------------------------------------------------------------------------------------------------------------------------------------------------------------------------------------------------------------------------------------------------------------------------------------------------------------------------------------------------------------------------------------------------------------------------------------------------------------------------------------------------------------------------------------------------------------------------------------------------------------------------------------------------------------------|
| Inclusion Criteria | <ul style="list-style-type: none"> <li>▪ Age &gt;18 years</li> <li>▪ Pregnant in week 9 to 21 after last menstrual period.</li> <li>▪ Verified moderate depression according to SCID-I (with or without a concomitant anxiety disorder) and a clinical evaluation.</li> <li>▪ Ability to use the internet platform for ICBT in Swedish as assessed by the study midwife.</li> <li>▪ Reported ability to participate in all study visits for mother and child.</li> </ul>                                                                                                                                                                                                       |
| Exclusion Criteria | <ul style="list-style-type: none"> <li>▪ Reported abuse of alcohol or drugs</li> <li>▪ Reported serious psychiatric disorder<sup>1</sup></li> <li>▪ Known allergy or idiosyncratic reaction to sertraline</li> <li>▪ Ongoing medication with antidepressants, mood-stabilizers, central stimulants, antiepileptic drugs, opiates, insulin, oral anti-diabetics, antiarrhythmics or steroids.</li> <li>▪ A severe somatic disease<sup>2</sup> that requires medical treatment.</li> <li>▪ A high suicidal risk during screening or when included into the study. These women will be excluded from the study and actively transferred to necessary psychiatric care.</li> </ul> |

**Table 1.** Inclusion and exclusion criteria for the MAGDALENA study. <sup>1</sup>) Psychosis, bipolar disorder, severe melancholic or psychotic depression, severe personality disorder, autism, mental retardation or Attention Deficit and Hyperactivity Disorder (ADHD)/Attention Deficit Disorder (ADD) with ongoing drug treatment or contact with specialist psychiatry clinic<sup>2</sup>) Severe heart and lung disease, kidney disease, liver disease, diabetes mellitus, epilepsy with drug treatment and any severe somatic disease that requires regular treatment with systemic steroids.

**Figure 2.** The recruitment base in Stockholm Healthcare Region. Numbers based on an analysis of prescription of SSRIs in pregnant women in years 2013-2016 in the Stockholm healthcare region with 2.3 million inhabitants. See Acknowledgements.

## The study drugs

Sertraline is one of the two first-line recommended drugs for depression during pregnancy according to the Drug and Therapeutics Committee in Stockholm Healthcare Region.<sup>48-50</sup> Sertraline is also widely used across Europe for treatment of depression during pregnancy.<sup>3,51,52</sup> This is why sertraline was the preferred choice as the study drug.

The investigational medicinal product (IMP) is a capsule containing either sertraline hydrochloride or placebo manufactured by APL (Apoteket Produktion & Laboratorier AB, Stockholm, Sweden). The capsules of active drug are made of hard gelatine and filled with sertraline hydrochloride corresponding to 25mg sertraline using Zoloft<sup>®</sup> (25mg sertraline film-coated tablets, Pfizer Ltd, New York) and with a microcrystalline cellulose filler. The placebo capsules are made of identical microcrystalline cellulose filler embedded into an identical hard gelatine capsule. The IMP is delivered by the producer in sealed HD polyethylene containers, labelled according to a randomisation list. Patients are randomised to treatment by Karolinska Trial Alliance (KTA) with block randomisation. The size of these blocks is blinded for the investigators.

The treatment with sertraline (or placebo) starts with titration of a dose of 1 capsule (25 mg sertraline or placebo) once daily for 5 days, after which the dose is increased to 2 capsules (50 mg of sertraline or placebo) once daily until the first treatment evaluation (Visit 3, Fig.1). At



1  
2  
3 visit 3 the daily dose can be increased to 4 capsules (100 mg of sertraline or placebo) once  
4 daily if clinically indicated, with titration of 3 capsules (75 mg of sertraline or placebo) once  
5 daily for 5 days. At visit 4 after 13 weeks of treatment, the dose can be increased further to a  
6 maximum 150 mg daily, without titration, if clinically needed. The decision of need to  
7 increase drug dosages is based on MADRS scores and a clinical evaluation made by the study  
8 psychiatrist. To follow and increase the adherence to treatment, the women will get a limited  
9 amount of capsules at each visit, motivating them to return for the next visit and giving the  
10 study midwife a way to notice if the subject is not taking the drug. Additional telephone  
11 contacts with the psychiatry nurse are performed if concerns about the treatment effect are  
12 raised, and an additional visit to the psychiatrist is scheduled if necessary. The study protocol  
13 attached as an appendix gives a detailed description of the treatments, monitoring of mothers  
14 and follow-up of both mothers and infants.  
15  
16  
17  
18

## 19 **The Internet-based Cognitive Behaviour Therapy**

20  
21 The ICBT-treatment is 12 weeks long and guided by a psychologist who is available online. It  
22 consists of an online platform where patients log in to answer questionnaires and work with  
23 self-help material covering the core materials in CBT for depression including interactive  
24 worksheets and exercises. They are also assigned weekly homework to report to their personal  
25 therapist. A direct messaging system allows for asynchronous correspondence with one of the  
26 therapists at any time and get a reply within a day or two. The platform allows monitoring to  
27 what extent the patients adhere to the therapeutic sessions.  
28  
29

30 The pregnancy-related adaptations of the ICBT-treatment consist of an extra module on  
31 pregnancy related symptoms that can lower mood at the beginning of the treatment and an  
32 extra module on relationships at the end of treatment. Other than that, the interventions mostly  
33 mirror those described and used by us in our ICBT-platform for non-pregnant adults.<sup>19</sup> The  
34 examples and cases includes concern pregnant women and their thoughts on pregnancy and  
35 becoming a parent and expanding their family. The core methods of the treatment are  
36 behavioural activation (increasing positive and valued activities) and cognitive restructuring  
37 (challenging own thoughts and distance oneself from dysfunctional thoughts and rumination).  
38  
39  
40

## 41 **Outcome measurements**

### 42 **Primary outcome: effect on neurodevelopment at 2 years of age**

43 The cognitive development at 2 years of age is the primary outcome. The outcome in children  
44 exposed and not exposed to sertraline *in utero* is measured with the standardized Bayley  
45 Scales of Infant and Toddler Development III (BSID-III<sup>®</sup>)<sup>44</sup> and compared between the  
46 groups. The BSID-III consists of the Cognitive, Language and Motor Scales that are  
47 performed by a child psychologist, and the Social Emotional and the Adaptive Scales that are  
48 parental questionnaires. The Cognitive and Language scales have proven to be good  
49 predictors of preschool mental test performance.<sup>53</sup> These scales are largely used in screening  
50 for cognitive developmental delays,<sup>54</sup> and have been used in studies of cognitive development  
51 after intrauterine drug exposure.<sup>55-57</sup> Results from the subscales will be converted to  
52 composite scores with a median of 100 and a standard deviation of 15. For each subscale, a  
53 composite score of <85 (<-1SD) will be considered abnormal. A difference of 7 points (0.5  
54  
55  
56  
57  
58  
59  
60

SD) between the groups will be considered significant, which is in line with the assumptions made in previous similar studies.<sup>54</sup>

### Sample size calculation

A difference of 7 points (SD 0.5) in the results of BSID-III at 2 years of age is considered a minimally important clinical difference, based on the previous follow-up studies performed with BSID.<sup>56,58,59</sup> We calculated, that with a power of 80% ( $\alpha$ : 0.05), this would show a significant difference in a sample of 73 participating children in each group. We hypothesise that there is a significant difference between the groups and have performed a calculation for a superiority test (effect on BSID for the sertraline exposed study group). We aim at recruiting 100 mothers in each group to rely on a result that has a margin for loss to follow-up, considering the long-term nature of this study. If no difference is found our study design will also provide enough power to test the non-inferiority hypothesis. According to a non-inferiority power calculation method<sup>60</sup> we will need 50 patients in each group to have power of 80% ( $\alpha$ : 0.05) to confirm that the SSRI-exposed children lies within a tolerance margin of 7 points below the control children. This corresponds to an effect size of 0.5 (Cohen's d). As a more conservative sensitivity test for non-inferiority, we will also use a tolerance margin of 5 points, which would correspond to an effect of  $d=0.36$ . This requires 97 patients in each group.

### Secondary outcome

The main psychiatric secondary outcome is the add-on effect of sertraline to the treatment with ICBT on depressive symptoms measured with MADRS-S (Montgomery-Åsberg Depression Rating Scale, Self-Report)<sup>61</sup> which is performed weekly throughout the 12 week treatment period.

### Sample size calculation for the secondary outcome

The additional effect of sertraline as compared to standard ICBT plus placebo will be evaluated by comparing effects on MADRS-S scores between the groups. Data on the total effect of CBT combined with antidepressant therapy is limited. The standardized effect of psychotherapy can be as high as 0.74 when compared to placebo and 0.38 when compared to face-to-face psychotherapy.<sup>26</sup> ICBT is largely self-directed even with therapist guidance, which is likely to put a higher demand on the patients in terms of initiative and maintaining the motivation compared to face-to-face-treatment. Therefore, it is likely that the added effect of SSRI will be larger than what has been found in face-to-face CBT, though not as large as when compared to placebo alone. We therefore hypothesize a standardized effect size of  $d=0.50$  (Cohen). This is also the minimal added effect that we would consider clinically relevant considering the possibility of negative side effects and the documented efficacy of ICBT alone.<sup>24</sup> A sample size calculation with standardized effect equal to 0.5 (Cohen),  $\alpha$ -value=0.05 and power 80% requires 64 persons in each group. Therefore to recruit 100 patients in each group will fulfil the power calculation.

### Exploratory tertiary studies

Exploratory maternal outcomes include the effects on levels on prolactin and cytokines and the risk for postpartum bleeding measured in mL and postpartum anaemia measured with haemoglobin day 2 for the SSRI-exposed women as compared to the placebo-exposed. We also evaluate the risk of preeclampsia, placental abruption and increased caesarean section rate.

1  
2  
3 The neonatal exploratory outcomes include admission to neonatal care, neurological  
4 evaluation with Hammersmith Neonatal Neurological Examination (HNNE)<sup>42</sup> and modified  
5 Finnegan Neonatal Abstinence Scales (NAS)<sup>41</sup> and measurement of glucose and  
6 concentrations of sertraline in plasma.  
7

8 In a sub-cohort, blood samples from the umbilical cord and placental biopsies are taken to  
9 study epigenetic effects (DNA methylation, genome width, and gene and mRNA expression)  
10 between SSRI-exposed and the non-exposed within this cohort.  
11

12 We will study differences in maternal-child bonding/attachment during and after birth and  
13 also breastfeeding occurrence. Prenatal Attachment Inventory-Revised questionnaires and  
14 video recordings analysed by "Dr Feldman's micro-coded behaviours" will be used which is a  
15 valid tool to study attachment.<sup>62</sup> A comparison will be made between the two groups.  
16

17 The pharmacokinetic analyses include studies of interindividual variability in plasma  
18 sertraline concentrations and its change during the course of pregnancy and postpartum (mean  
19 concentration/ (dose in mg/kg) with confidence intervals. Pharmacogenetic variants of drug  
20 metabolizing enzymes and transporters will be studied in pregnant women and newborns.  
21 Umbilical cord blood and venous blood from the neonate will be taken and plasma sertraline  
22 levels are assayed. Variability in exposure to sertraline between the neonates will be  
23 investigated and the levels will be related to the degree of maladaptation syndrome.  
24  
25  
26

## 27 **Data management**

28 Each subject will receive a study number for identification. Data will be collected  
29 continuously and entered into the electronic Case Report File (eCRF) within two weeks from  
30 collection. The e-CRF includes range checks for data values to promote data quality. For the  
31 study database we are using an electronic system, Pheedit version 3,0; SAS Institute Inc.,  
32 Cary, NC, provided by Stockholm Healthcare Region, Sweden. The data is encrypted and  
33 safely stored on an electronic server at the Karolinska Institute in Stockholm. The e-CRF is  
34 previously used in randomised controlled studies.<sup>63</sup> After completed data collection, the  
35 investigators will receive unidentified patient data withdrawn from the CRF and synchronized  
36 with data from the internet psychiatry platform. The internet psychiatry platform was also  
37 used in our previous study.<sup>24</sup> The investigators will analyse this data for the different  
38 endpoints of the study. The samples from whole blood (mainly to extract DNA for  
39 pharmacogenetic analyses in the mother and in the newborns), plasma, cord blood, placenta  
40 biopsies and the buccal swabs will be stored in the biobank at Karolinska Institutet in  
41 Stockholm, available for analyses and future research.  
42  
43  
44  
45  
46  
47

## 48 **Statistical Methods**

49 The main analyses will be done according to the intention to treat principle. Data will also be  
50 analysed per protocol to achieve an efficacy analysis. The primary endpoint, results of BSID  
51 III<sup>®</sup> will be analysed with Student's T-test. According to the hypothesis for the primary  
52 objective a superiority analysis will be carried out. In case of no difference in BSID-scores  
53 non-inferiority analyses with a tolerance level of 7 points in the BSID III<sup>®</sup> will be used. We  
54 may also include a more conservative sensitivity analysis using a tolerance level of 5 points.  
55  
56  
57  
58  
59



Multiple imputation will be used for missing data. The variables used in the imputation mode will be smoking, education level, gestational age and parity. Preterm children will be included in the analysis as the chosen psychological and neurological tests are performed at corrected age. All patients' demographic data will be analysed by descriptive (mean, median and range) statistics. Fisher's exact test will be used for dichotomous variables such as infant sex, mother's smoking and optimal/suboptimal neurology at Hammersmith neonatal neurological examination. Throughout the analysis, the mean and standard deviation will be calculated for all continuous data using Student's T-test. The non-normally distributed continuous variables, including the results from Hammersmith neurological scales will be analysed with the Mann-Whitney u test and the results of MADRS-S by Cohen's effect size. For categorical variables, absolute frequency, percentages and/or proportions are calculated and Fishers exact test will be used. The treatment effect analysis will be a multilevel model for longitudinal data with timepoints nested within individuals (a.k.a. Growth Curve Modeling) using MADRS-S scores from baseline, each of the 12 weeks in treatment, and post treatment. A p-value of <0.05 will be considered significant. Subgroup analyses will be performed for prematurity, smokers, parity, maternal age and education level. Spearman's correlation test will be used to test the correlation between maternal and infant drug concentration.

## Patient and Public Involvement

No patients or public have been involved in the design, recruitment or conduction of the study.

## Ethics and dissemination

### Ethics approval and consent to participate

The Regional Ethical Review Board at Karolinska Institutet in Stockholm approved this study with the approval number 2014/952-31 with the last amendment approved 20180507. The Swedish Medical Products Agency (SMPA) approved this study with the approval number 5.1-2016-51237 with the last amendment approved 20160701. The included Appendix to this article includes a few clarifications in the protocol and is submitted to the Regional Ethical Review Board and the SMPA to be approved as an amendment. Written consent is obtained from all participants at inclusion. At the end of the pregnancy, written consent is obtained from the child's other guardian. All protocol amendments are sent to the Regional Ethical Review Board and the Medical Products Agency for approval before taken in practice. A copy is also sent to clinicaltrials.gov.

### Adverse events

Sertraline is one of the recommended drugs for depression during pregnancy in Stockholm Healthcare Region by the Drug and Therapeutics Committee with high adherence.<sup>49,50</sup> Sertraline is also one of the most prescribed SSRIs in the Nordic countries, and is widely used

1  
2  
3 across Europe for treatment of depression during pregnancy.<sup>3,51,52</sup> Thereby the therapeutic  
4 profile, the adverse effects and the adverse reactions are well known to the study psychiatrists.  
5

6 An adverse event (AE) is defined as any undesirable experience associated with the use of the  
7 trial drug, sertraline or placebo. A serious adverse event (SAE) is defined as death, a life-  
8 threatening event, hospitalization (initial or prolonged), disability, permanent damage or a  
9 congenital birth defect. Expected serious adverse reactions are listed in the Summary of  
10 Product Characteristics (SPC). A Suspected Unexpected Serious Adverse Reaction (SUSAR)  
11 is defined as an adverse effect not listed in the SpC and not mentioned in the SPC as  
12 anticipated due to pharmacokinetic properties of the drug, or as a reaction that has occurred  
13 with other drugs in this class, but not with the study drug. Unexpected adverse events to ICBT  
14 will also be reported. All adverse events occurring after enrolment are documented in the  
15 electronic Case Report Form (e-CRF). The adverse events will be reported to the principal  
16 investigator, who will report to the sponsor, and in due cases the Karolinska Trial Alliance  
17 (KTA) for registration in EudraVigilance. All unexpected serious adverse reactions have to be  
18 reported within 24 hours after notification by the study personnel. In case of a serious adverse  
19 event such as death or a life threatening event, the PI will raise the issue of breaking the code  
20 and termination of the study with the Data Monitoring and Safety Committee (see below).  
21 The committee are responsible for the final decision of study termination. The sponsor will  
22 each year of the study perform a safety report (DSUR) to Swedish Medical Products Agency.  
23  
24  
25  
26  
27

## 28 **Monitoring and Study safety**

29  
30 An independent monitor from Karolinska Trial Alliance (KTA), Karolinska University  
31 Hospital, will continuously control that the study follows approved protocol, with regular  
32 audits with the study midwife and the PI. The staff at KTA have all relevant certifications for  
33 Good Clinical Practice (GCP) procedures. Participation in the study is voluntary and women  
34 are free to discontinue their participation at any time and for whatever reason without  
35 explanations. Midwives at the outpatient clinics and at the delivery clinic have been made  
36 aware of this. A Data Monitoring and Safety Committee (DMC) with senior experts in  
37 biostatistics, psychiatry, clinical pharmacology (sub-specialised in paediatrics) and  
38 neonatology. The committee can at any time if there is any suspicion of a serious adverse  
39 event break the code and undertake necessary precautions including stopping the study. The  
40 committee is independent from the sponsor with no competing interests or involvement in the  
41 design, planning or management of the study. The DMC is also responsible for developing  
42 guidelines for interruption of the study and for any interim analyses. The DMC is responsible  
43 for deciding if sub-study exploratory investigations can be carried out before the recruitment  
44 of all 200 mothers and all 2-year neurodevelopment investigations are completed.  
45  
46  
47  
48  
49

## 50 **Dissemination plan**

51  
52 This study has as main aim to clarify if any long-term effect on neurodevelopment can be  
53 detected in children exposed to sertraline therapy *in utero*. Other issues will be studied as  
54 secondary and tertiary objectives including evaluation of the add-on effect of sertraline to  
55 ICBT in moderately depressed pregnant women. The study team will design and implement a  
56  
57  
58  
59

1  
2  
3 knowledge translation (KT) plan using established methods for dissemination of scientific  
4 results but also modern communication strategies using social media. The KT plan will  
5 benefit from strength of being a multidisciplinary scientific group with access to numerous  
6 regional, national and international scientific and clinical communities and active  
7 involvement of many of the study group scientists in communication with patient groups on  
8 psychiatric health and drug therapy during pregnancy. The team has combined years of  
9 experience to communicate with colleagues on drug recommendations and achieve high  
10 adherence to them using a combination of multifaceted (marketing, continuous medical  
11 education, decision support and quality network with colleagues).<sup>49,50</sup> In summary we will use  
12 established scientific channels to communicate our findings (A): 1. At national and  
13 international scientific meetings, 2. As international scientific publications including  
14 publishing our study protocol and 3. By contacting relevant international bodies for  
15 development of guidelines on best practice in treatment of psychiatric diseases during  
16 pregnancy including WHO. We will also use modern communication methods<sup>49,50</sup> (B): 1. To  
17 summarize our findings for laymen and pregnant groups in Swedish and English and 2. To  
18 cooperate with these groups to have information disseminated through their publications and  
19 websites. Our aim is to improve knowledge about the need to a higher degree treat depression  
20 during pregnancy with the alternatives that we and others have found effective. If we, as  
21 hypothesized, will find no effect of sertraline therapy on neurodevelopment in two year old  
22 infants, it will be one of the most relevant findings to communicate scientifically and to  
23 laymen. The legitimacy of our findings will be high if the results are published in peer-  
24 reviewed journals and presented at national and international scientific conferences for  
25 scrutiny and discussion.  
26  
27  
28  
29

## 30 Discussion

31  
32 We hypothesise that sertraline exposure in therapeutic dosage during pregnancy can cause a  
33 recognizable effect on the cognition in the offspring as assessed by BSID-III<sup>®</sup> at 2 years of  
34 age. A balanced review supports this hypothesis.<sup>11</sup> Recent large register based studies<sup>16,17</sup>  
35 imply the importance of a randomised controlled trial to receive sound evidence in this  
36 question. As the previous observational studies comment,<sup>12,13</sup> they have not found a way to  
37 adequately adjust for unmeasurable confounders, such as genetic inheritance and disease  
38 severity, that we suspect play a significant role when interpreting the results. Using a  
39 randomised design in the MAGDALENA study, we minimize the risk for confounding  
40 factors.  
41  
42

43 We also aim to clarify whether combination therapy with ICBT and sertraline is an adequate  
44 treatment alternative for moderate depression during pregnancy. This new treatment option  
45 provides the pregnant women relevant pregnancy-related questions and the possibility to  
46 individually schedule the treatment sessions. Also to our knowledge, no prior placebo-  
47 controlled clinical trials have assessed whether combination treatment is superior to treatment  
48 with ICBT alone, which we are doing. The risks for the participating women and their  
49 offspring are not increased compared to the regular treatment available, as sertraline is widely  
50 used in clinical routine in Sweden today. On the contrary, the participating women will have a  
51 more thorough follow up than in clinical practice.  
52  
53

54 The ethics of performing a RCT in this field has been discussed.<sup>64,65</sup> Our study design with  
55 ICBT and sertraline or placebo for depression during pregnancy was enabled by recent studies  
56 that confirmed the safety and efficacy of ICBT in treating depression, including prenatal  
57  
58  
59

1  
2  
3 depression.<sup>24,28</sup> To date, there is to our knowledge no other study group performing a similar  
4 study with the neurodevelopment of the offspring as the main outcome measure. An ongoing  
5 Dutch study group randomise clinically undepressed women on antidepressive treatment to  
6 either guided drug discontinuation with CBT or continuation of drug therapy.<sup>66</sup> Their primary  
7 outcome is the incidence of relapse or recurrence of maternal depression, but they also look at  
8 the long-term neurodevelopment with questionnaire based follow-up at 18 months. We  
9 consider our method with psychological assessment at 2 years of age more reliable than  
10 parental questionnaires. We think that these two studies will complement each other well. Our  
11 study will have the unique opportunity to distinguish the effects of exposure to SSRI in utero  
12 from the ones of underlying depression, considering our inclusion criteria of moderately  
13 depressed women.  
14

15  
16 A limitation with our study design is the strict inclusion and exclusion criteria potentially  
17 causing problems in generalising the results to larger groups of depressed pregnant women.  
18 So far, we have not seen any tendencies to exclusion of relevant subgroups. The most  
19 common reason for exclusion so far has been not having a severe enough, treatment requiring  
20 depression. We collect baseline data from all excluded patients to stay informed about  
21 potential statistical biases caused by exclusion. We also know, that the recruitment will be  
22 challenging, considering the limited study population of clinically depressed, pregnant women  
23 without medical treatment with a short time frame for recruitment. We have addressed this  
24 using a combined approach recruiting both at ordinary antenatal clinics and through social  
25 media, pregnancy applications on smart-phones as well as with marketing campaigns. Studies  
26 worldwide show that three out of four pregnant women use a pregnancy related application,  
27 showing their great potential.<sup>45,46</sup> Our web-based recruitment and treatment also gives us the  
28 possibility to invite additional study centres across the country if necessary to complete the  
29 recruitment. We are constantly facing fears from potential subjects of taking antidepressant  
30 treatment during pregnancy.  
31

32  
33 We have been working with this study for four years, specifying and completing the protocol  
34 and getting ethical approval and permission from the national Medical Products Agency. In  
35 addition, it has taken an additional year to test the feasibility by completing the first five  
36 patients through the pregnancy and delivery parts of the trial (January 2018). During these  
37 five years, the multidisciplinary research group with less and more experienced members has  
38 had regular meetings. So far, we have not met any problems in raising needed funds, received  
39 both from major national and regional funders of clinical research as well as from multiple  
40 funders specialized to support studies on safe care of mother and child during pregnancy and  
41 in early life. Therefore, we are confident to finish the recruitment within six years, based on  
42 our calculations on data from Stockholm Healthcare Region (Figure 2) and publish the results  
43 in another three years.  
44  
45  
46  
47  
48

## 49 **Declarations**

### 51 **Availability of data and material**

52  
53 Not applicable.  
54

### 56 **Competing interests**

1  
2  
3 The authors declare that they have no competing interests.  
4  
5

## 6 **Funding**

7  
8 This project is funded by the Swedish Research Council (DNR 521-2012-3466), the regional  
9 agreement on medical training and clinical research between Karolinska Institutet and  
10 Stockholm City Council (ALF, project number 533069 years 2015-2017 and project number  
11 571301 years 2018-2020) and Lilla Barnets Fond. The funding agencies do not have any part  
12 in the design, data collection and analysis or reporting of this trial.  
13

## 14 **Authors' contributions**

15  
16  
17 EH and LLG wrote the initial study protocol article with the help of BSS, LF and AF. KW is  
18 the principal investigator and JN, LLG, MB and VK are members of the governing study  
19 board. MB is the sponsor and the main applicant and receiver of our initial ground-breaking  
20 funding decision from the Swedish Research Council. MB is also a senior researcher with full  
21 responsibility of the study design and participation in completion of the manuscript.  
22 JN, KW and MB conceived the study protocol and KW wrote the initial draft of the study  
23 protocol. EA is developing an exploratory study protocol studying attachment in a subgroup  
24 of the pregnant women. MBk, SF and EH launched the open recruitment through different  
25 social media platforms. VK and EF adapted the ICBT procedure for use in our pregnant  
26 women and are responsible for the ICBT treatment. They also directed the pilot study. AF is  
27 the study midwife coordinating the visits and the day to day management of the study. M.B-  
28 W, MS and AG are the study psychiatrists responsible for the initial assessment and inclusion  
29 in the study as well as for the clinical decisions about pharmacotherapy. E-M.N is the  
30 psychiatry nurse responsible for the treatment evaluations. All authors have in different ways  
31 been involved in different degrees in the development of study design and take responsibility  
32 for the final study design. All authors have contributed to the protocol development and have  
33 read and approved the final protocol that we now use after revisions as well as this  
34 manuscript. EH and LLG coordinated the completion of the study protocol article.  
35  
36  
37

## 38 **Acknowledgements**

39  
40 We used the SPIRIT checklist when writing this article. We would like to acknowledge M.  
41 Juhasz-Haverinen at Public Healthcare Services Committee (HSF) at Stockholm Healthcare  
42 Region (SLL) for providing data on our recruitment base of patients for the study (Figure 2)  
43 as well as M Bendix, ML Dahl and C Ruck for input on the study protocol at an early phase.  
44 We are grateful for statistical advice provided at various stages in the design of the study  
45 provided by the biostatistician Ulf Hammar at Karolinska Institutet. We would also like to  
46 acknowledge all women, their babies and their families who participate in the MAGDALENA  
47 study and the numerous midwives, obstetricians and staff at all MAGDALENA recruiting  
48 Antenatal Clinics and Maternity Wards and Delivery Units in Stockholm Healthcare Region.  
49  
50

## 51 **Trial Registration and Status**

52  
53 European Clinical Trials Database (EudraCT) Number: 2013-004444-31. Date registered  
54 20140511. Current protocol version 5.3 180507. Recruitment start 2016. Approximate  
55 completion of recruitment 2023, approximate completion of data collection 2025.  
56  
57  
58  
59



## References

1. Le Strat Y, Dubertret C, Le Foll B. Prevalence and correlates of major depressive episode in pregnant and postpartum women in the United States. *J Affect Disord* 2011;135(1-3):128-38. doi: 10.1016/j.jad.2011.07.004
2. Gavin NI, Gaynes BN, Lohr KN, et al. Perinatal depression: a systematic review of prevalence and incidence. *Obstet Gynecol* 2005;106(5 Pt 1):1071-83. doi: 10.1097/01.AOG.0000183597.31630.db
3. Zoega H, Kieler H, Norgaard M, et al. Use of SSRI and SNRI Antidepressants during Pregnancy: A Population-Based Study from Denmark, Iceland, Norway and Sweden. *PLoS One* 2015;10(12):e0144474. doi: 10.1371/journal.pone.0144474 [published Online First: 2015/12/15]
4. Qiu C, Williams MA, Calderon-Margalit R, et al. Preeclampsia risk in relation to maternal mood and anxiety disorders diagnosed before or during early pregnancy. *Am J Hypertens* 2009;22(4):397-402. doi: 10.1038/ajh.2008.366 [published Online First: 2009/02/07]
5. Grote NK, Bridge JA, Gavin AR, et al. A meta-analysis of depression during pregnancy and the risk of preterm birth, low birth weight, and intrauterine growth restriction. *Arch Gen Psychiatry* 2010;67(10):1012-24. doi: 10.1001/archgenpsychiatry.2010.111
6. Field T, Diego M, Hernandez-Reif M. Prenatal depression effects on the fetus and newborn: a review. *Infant Behav Dev* 2006;29(3):445-55. doi: 10.1016/j.infbeh.2006.03.003
7. Gentile S. Untreated depression during pregnancy: Short- and long-term effects in offspring. A systematic review. *Neuroscience* 2017;342:154-66. doi: 10.1016/j.neuroscience.2015.09.001
8. Norby U, Forsberg L, Wide K, et al. Neonatal Morbidity After Maternal Use of Antidepressant Drugs During Pregnancy. *Pediatrics* 2016;138(5) doi: 10.1542/peds.2016-0181
9. Andrade SE, Reichman ME, Mott K, et al. Use of selective serotonin reuptake inhibitors (SSRIs) in women delivering liveborn infants and other women of child-bearing age within the U.S. Food and Drug Administration's Mini-Sentinel program. *Arch Womens Ment Health* 2016;19(6):969-77. doi: 10.1007/s00737-016-0637-1
10. Furu K, Kieler H, Haglund B, et al. Selective serotonin reuptake inhibitors and venlafaxine in early pregnancy and risk of birth defects: population based cohort study and sibling design. *BMJ* 2015;350:h1798. doi: 10.1136/bmj.h1798 [published Online First: 2015/04/19]
11. Oberlander TF, Gingrich JA, Ansorge MS. Sustained neurobehavioral effects of exposure to SSRI antidepressants during development: molecular to clinical evidence. *Clin Pharmacol Ther* 2009;86(6):672-7. doi: 10.1038/clpt.2009.201
12. Rai D, Lee BK, Dalman C, et al. Parental depression, maternal antidepressant use during pregnancy, and risk of autism spectrum disorders: population based case-control study. *BMJ* 2013;346:f2059. doi: 10.1136/bmj.f2059
13. Rai D, Lee BK, Dalman C, et al. Antidepressants during pregnancy and autism in offspring: population based cohort study. *BMJ* 2017;358:j2811. doi: 10.1136/bmj.j2811 [published Online First: 2017/07/21]

14. Croen LA, Grether JK, Yoshida CK, et al. Antidepressant use during pregnancy and childhood autism spectrum disorders. *Arch Gen Psychiatry* 2011;68(11):1104-12. doi: 10.1001/archgenpsychiatry.2011.73 [published Online First: 2011/07/06]
15. El Marroun H, White TJ, van der Knaap NJ, et al. Prenatal exposure to selective serotonin reuptake inhibitors and social responsiveness symptoms of autism: population-based study of young children. *Br J Psychiatry* 2014;205(2):95-102. doi: 10.1192/bjp.bp.113.127746
16. Brown HK, Ray JG, Wilton AS, et al. Association Between Serotonergic Antidepressant Use During Pregnancy and Autism Spectrum Disorder in Children. *JAMA* 2017;317(15):1544-52. doi: 10.1001/jama.2017.3415
17. Sujan AC, Rickert ME, Oberg AS, et al. Associations of Maternal Antidepressant Use During the First Trimester of Pregnancy With Preterm Birth, Small for Gestational Age, Autism Spectrum Disorder, and Attention-Deficit/Hyperactivity Disorder in Offspring. *JAMA* 2017;317(15):1553-62. doi: 10.1001/jama.2017.3413
18. Morales DR, Slattery J, Evans S, et al. Antidepressant use during pregnancy and risk of autism spectrum disorder and attention deficit hyperactivity disorder: systematic review of observational studies and methodological considerations. *BMC Med* 2018;16(1):6. doi: 10.1186/s12916-017-0993-3 [published Online First: 2018/01/16]
19. Hedman E, Ljotsson B, Kaldo V, et al. Effectiveness of Internet-based cognitive behaviour therapy for depression in routine psychiatric care. *J Affect Disord* 2014;155:49-58. doi: 10.1016/j.jad.2013.10.023
20. O'Mahen HA, Woodford J, McGinley J, et al. Internet-based behavioral activation--treatment for postnatal depression (Netmums): a randomized controlled trial. *Journal of affective disorders* 2013;150(3):814. doi: 10.1016/j.jad.2013.03.005
21. Danaher BG, Milgrom J, Seeley JR, et al. MomMoodBooster Web-Based Intervention for Postpartum Depression: Feasibility Trial Results. *J Med Internet Res* 2013;15(11):20. doi: 10.2196/jmir.2876
22. O'Mahen HA, Richards DA, Woodford J, et al. Netmums: a phase II randomized controlled trial of a guided Internet behavioural activation treatment for postpartum depression. *Psychol Med* 2014;44(8):1675-89. doi: 10.1017/s0033291713002092
23. Pugh NE, Hadjistavropoulos HD, Dirkse D. A Randomised Controlled Trial of Therapist-Assisted, Internet-Delivered Cognitive Behavior Therapy for Women with Maternal Depression. *PLoS ONE* 2016;11(3):e0149186. doi: 10.1371/journal.pone.0149186
24. Forsell E, Bendix M, Hollandare F, et al. Internet delivered cognitive behavior therapy for antenatal depression: A randomised controlled trial. *J Affect Disord* 2017;221:56-64. doi: 10.1016/j.jad.2017.06.013 [published Online First: 2017/06/20]
25. Nationella riktlinjer för vård vid depression och ångestsyndrom: Socialstyrelsen. <https://roi.socialstyrelsen.se/riktlinjer/nationella-riktlinjer-for-var-d-vid-depression-och-angestsyndrom>; 2017 [accessed 16/02 2018].
26. Cuijpers P, Sijbrandij M, Koole SL, et al. Adding psychotherapy to antidepressant medication in depression and anxiety disorders: a meta-analysis. *World Psychiatry* 2014;13(1):56-67. doi: 10.1002/wps.20089 [published Online First: 2014/02/06]



- 1  
2  
3 27. Andrews G, Cuijpers P, Craske MG, et al. Computer therapy for the anxiety and  
4 depressive disorders is effective, acceptable and practical health care: a meta-  
5 analysis. *PLoS One* 2010;5(10):e13196. doi: 10.1371/journal.pone.0013196
- 6 28. Cuijpers P, Donker T, van Straten A, et al. Is guided self-help as effective as face-to-face  
7 psychotherapy for depression and anxiety disorders? A systematic review and  
8 meta-analysis of comparative outcome studies. *Psychol Med*  
9 2010;40(12):1943-57. doi: 10.1017/S0033291710000772
- 10 29. Lindqvist PG, Nasiell J, Gustafsson LL, et al. Selective serotonin reuptake inhibitor use  
11 during pregnancy increases the risk of postpartum hemorrhage and anemia: a  
12 hospital-based cohort study. *J Thromb Haemost* 2014;12(12):1986-92. doi:  
13 10.1111/jth.12757 [published Online First: 2014/10/18]
- 14 30. Moses-Kolko EL, Bogen D, Perel J, et al. Neonatal signs after late in utero exposure to  
15 serotonin reuptake inhibitors: literature review and implications for clinical  
16 applications. *JAMA* 2005;293(19):2372-83. doi: 10.1001/jama.293.19.2372
- 17 31. Basterzi AD, Aydemir C, Kisa C, et al. IL-6 levels decrease with SSRI treatment in  
18 patients with major depression. *Hum Psychopharmacol* 2005;20(7):473-6. doi:  
19 10.1002/hup.717 [published Online First: 2005/09/15]
- 20 32. Park YM. Serum Prolactin Levels in Patients with Major Depressive Disorder Receiving  
21 Selective Serotonin-Reuptake Inhibitor Monotherapy for 3 Months: A  
22 Prospective Study. *Psychiatry Investig* 2017;14(3):368-71. doi:  
23 10.4306/pi.2017.14.3.368 [published Online First: 2017/05/26]
- 24 33. Susser LC, Sansone SA, Hermann AD. Selective serotonin reuptake inhibitors for  
25 depression in pregnancy. *Am J Obstet Gynecol* 2016;215(6):722-30. doi:  
26 10.1016/j.ajog.2016.07.011 [published Online First: 2016/07/20]
- 27 34. Nonnenmacher N, Noe D, Ehrenthal JC, et al. Postpartum bonding: the impact of maternal  
28 depression and adult attachment style. *Arch Womens Ment Health*  
29 2016;19(5):927-35. doi: 10.1007/s00737-016-0648-y [published Online First:  
30 2016/06/15]
- 31 35. Freeman MP, Nolan PE, Jr., Davis MF, et al. Pharmacokinetics of sertraline across  
32 pregnancy and postpartum. *J Clin Psychopharmacol* 2008;28(6):646-53. doi:  
33 10.1097/JCP.0b013e31818d2048 [published Online First: 2008/11/18]
- 34 36. Hellden A, Madadi P. Pregnancy and pharmacogenomics in the context of drug  
35 metabolism and response. *Pharmacogenomics* 2013;14(14):1779-91. doi:  
36 10.2217/pgs.13.176 [published Online First: 2013/11/07]
- 37 37. Saiz-Rodríguez M, Belmonte C, Román M, et al. Effect of Polymorphisms on the  
38 Pharmacokinetics, Pharmacodynamics and Safety of Sertraline in Healthy  
39 Volunteers. *Basic Clin Pharmacol Toxicol*;0(0) doi: doi:10.1111/bcpt.12938
- 40 38. Viuff AC, Pedersen LH, Kyng K, et al. Antidepressant medication during pregnancy and  
41 epigenetic changes in umbilical cord blood: a systematic review. *Clin*  
42 *Epigenetics* 2016;8(1):94. doi: 10.1186/s13148-016-0262-x [published Online  
43 First: 2016/09/10]
- 44 39. Rubertsson C, Borjesson K, Berglund A, et al. The Swedish validation of Edinburgh  
45 Postnatal Depression Scale (EPDS) during pregnancy. *Nord J Psychiatry*  
46 2011;65(6):414-8. doi: 10.3109/08039488.2011.590606
- 47 40. Montgomery SA, Asberg M. A new depression scale designed to be sensitive to change.  
48 *Br J Psychiatry* 1979;134:382-9. [published Online First: 1979/04/01]
- 49 41. Forsberg L, Naver L, Gustafsson LL, et al. Neonatal adaptation in infants prenatally  
50 exposed to antidepressants--clinical monitoring using Neonatal Abstinence  
51 Score. *PLoS One* 2014;9(11):e111327. doi: 10.1371/journal.pone.0111327  
52 [published Online First: 2014/11/05]
- 53  
54  
55  
56  
57  
58  
59  
60

- 1  
2  
3 42. Dubowitz L, Ricciw D, Mercuri E. The Dubowitz neurological examination of the full-  
4 term newborn. *Ment Retard Dev Disabil Res Rev* 2005;11(1):52-60. doi:  
5 10.1002/mrdd.20048 [published Online First: 2005/04/28]
- 6 43. Romeo DM, Cioni M, Palermo F, et al. Neurological assessment in infants discharged  
7 from a neonatal intensive care unit. *Eur J Paediatr Neurol* 2013;17(2):192-8.  
8 doi: 10.1016/j.ejpn.2012.09.006 [published Online First: 2012/10/16]
- 9 44. Albers CA, Grieve AJ. Test Review: Bayley, N. (2006). Bayley Scales of Infant and  
10 Toddler Development– Third Edition. San Antonio, TX: Harcourt Assessment.  
11 *J Psychoeduc Assess* 2007;25(2):180-90. doi: 10.1177/0734282906297199
- 12 45. Lupton D, Pedersen S. An Australian survey of women's use of pregnancy and parenting  
13 apps. *Women Birth* 2016;29(4):368-75. doi: 10.1016/j.wombi.2016.01.008  
14 [published Online First: 2016/02/15]
- 15 46. Osma J, Barrera AZ, Ramphos E. Are Pregnant and Postpartum Women Interested in  
16 Health-Related Apps? Implications for the Prevention of Perinatal Depression.  
17 *Cyberpsychol Behav Soc Netw* 2016;19(6):412-5. doi:  
18 10.1089/cyber.2015.0549 [published Online First: 2016/06/22]
- 19 47. First MB. Structured Clinical Interview for DSM-IV Axis I Disorders, Clinician Version  
20 (SCID-CV). In: Spitzer C, ed. Washington, D.C.: American Psychiatric Press,  
21 Inc., 1996.
- 22 48. SLL. Regionalt vårdprogram psykisk sjukdom i samband med graviditet och  
23 spädbarnsperiod. pp. 20 & 34 (Translated: Stockholm City Council - Regional  
24 recommendations of treatment of psychiatric disease during pregnancy and  
25 infancy.) 2014 [Available from:  
26 [http://www1.psykiatristod.se/Global/Psykiatristod/Bilagor/RVP\\_GravDepp\\_w](http://www1.psykiatristod.se/Global/Psykiatristod/Bilagor/RVP_GravDepp_w)  
27 [ebb.pdf](http://www1.psykiatristod.se/Global/Psykiatristod/Bilagor/RVP_GravDepp_w) accessed 31/5 2018.
- 28 49. Gustafsson LL, Wettermark B, Godman B, et al. The 'wise list'- a comprehensive concept  
29 to select, communicate and achieve adherence to recommendations of essential  
30 drugs in ambulatory care in Stockholm. *Basic Clin Pharmacol Toxicol*  
31 2011;108(4):224-33. doi: 10.1111/j.1742-7843.2011.00682.x [published  
32 Online First: 2011/03/19]
- 33 50. Eriksen J, Gustafsson LL, Ateva K, et al. High adherence to the 'Wise List' treatment  
34 recommendations in Stockholm: a 15-year retrospective review of a  
35 multifaceted approach promoting rational use of medicines. *BMJ Open*  
36 2017;7(4):e014345. doi: 10.1136/bmjopen-2016-014345 [published Online  
37 First: 2017/05/04]
- 38 51. Charlton RA, Jordan S, Pierini A, et al. Selective serotonin reuptake inhibitor prescribing  
39 before, during and after pregnancy: a population-based study in six European  
40 regions. *BJOG* 2015;122(7):1010-20. doi: 10.1111/1471-0528.13143
- 41 52. Cleare A, Pariante CM, Young AH, et al. Evidence-based guidelines for treating  
42 depressive disorders with antidepressants: A revision of the 2008 British  
43 Association for Psychopharmacology guidelines. *J Psychopharmacol*  
44 2015;29(5):459-525. doi: 10.1177/0269881115581093 [published Online First:  
45 2015/05/15]
- 46 53. Bode MM, D'Eugenio DB, Mettelman BB, et al. Predictive validity of the Bayley, Third  
47 Edition at 2 years for intelligence quotient at 4 years in preterm infants. *J Dev*  
48 *Behav Pediatr* 2014;35(9):570-5. doi: 10.1097/DBP.000000000000110  
49 [published Online First: 2014/11/06]
- 50 54. Serenius F, Kallen K, Blennow M, et al. Neurodevelopmental outcome in extremely  
51 preterm infants at 2.5 years after active perinatal care in Sweden. *JAMA*  
52  
53  
54  
55  
56  
57  
58  
59  
60

- 2013;309(17):1810-20. doi: 10.1001/jama.2013.3786 [published Online First: 2013/05/02]
55. Santucci AK, Singer LT, Wisniewski SR, et al. Impact of prenatal exposure to serotonin reuptake inhibitors or maternal major depressive disorder on infant developmental outcomes. *J Clin Psychiatry* 2014;75(10):1088-95. doi: 10.4088/JCP.13m08902 [published Online First: 2014/11/06]
56. Casper RC, Fleisher BE, Lee-Ancajas JC, et al. Follow-up of children of depressed mothers exposed or not exposed to antidepressant drugs during pregnancy. *J Pediatr* 2003;142(4):402-8. doi: 10.1067/mpd.2003.139
57. Cardonick EH, Gringlas MB, Hunter K, et al. Development of children born to mothers with cancer during pregnancy: comparing in utero chemotherapy-exposed children with nonexposed controls. *Am J Obstet Gynecol* 2015;212(5):658 e1-8. doi: 10.1016/j.ajog.2014.11.032 [published Online First: 2014/12/02]
58. Serenius F, Källén K, Blennow M, et al. Neurodevelopmental outcome in extremely preterm infants at 2.5 years after active perinatal care in Sweden. *JAMA* 2013;309(17):1810-20. doi: 10.1001/jama.2013.3786
59. Woudes TA, Lagasse LL, Huestis MA, et al. Prenatal methamphetamine exposure and neurodevelopmental outcomes in children from 1 to 3 years. *Neurotoxicol Teratol* 2014;42:77-84. doi: 10.1016/j.ntt.2014.02.004 [published Online First: 2014/02/26]
60. Tamayo-Sarver JH, Dawson NV, Hinze SW, et al. The effect of race/ethnicity and desirable social characteristics on physicians' decisions to prescribe opioid analgesics. *Acad Emerg Med* 2003;10(11):1239-48. [published Online First: 2003/11/05]
61. Svanborg P, Åsberg M. A new self-rating scale for depression and anxiety states based on the Comprehensive Psychopathological Rating Scale. *Acta Psychiatr Scand* 1994;89(1):21-28. doi: 10.1111/j.1600-0447.1994.tb01480.x
62. Friedman DD, Beebe B, Jaffe J, et al. Microanalysis of 4-Month Infant Vocal Affect Qualities and Maternal Postpartum Depression. *Clin Soc Work J* 2010;38(1):8-16. doi: 10.1007/s10615-010-0261-x
63. Foukakis T, von Minckwitz G, Bengtsson NO, et al. Effect of Tailored Dose-Dense Chemotherapy vs Standard 3-Weekly Adjuvant Chemotherapy on Recurrence-Free Survival Among Women With High-Risk Early Breast Cancer: A Randomized Clinical Trial. *JAMA* 2016;316(18):1888-96. doi: 10.1001/jama.2016.15865 [published Online First: 2016/11/09]
64. Oberlander TF, Vigod SN. Developmental Effects of Prenatal Selective Serotonin Reuptake Inhibitor Exposure in Perspective: Are We Comparing Apples to Apples? *J Am Acad Child Adolesc Psychiatry* 2016;55(5):351-2. doi: 10.1016/j.jaac.2016.02.012 [published Online First: 2016/04/30]
65. Coverdale JH, McCullough LB, Chervenak FA. The ethics of randomized placebo-controlled trials of antidepressants with pregnant women: a systematic review. *Obstet Gynecol* 2008;112(6):1361-8. doi: 10.1097/AOG.0b013e31818c2a27 [published Online First: 2008/11/28]
66. Molenaar NM, Brouwer ME, Bockting CL, et al. Stop or go? Preventive cognitive therapy with guided tapering of antidepressants during pregnancy: study protocol of a pragmatic multicentre non-inferiority randomized controlled trial. *BMC Psychiatry* 2016;16:72. doi: 10.1186/s12888-016-0752-6 [published Online First: 2016/03/20]

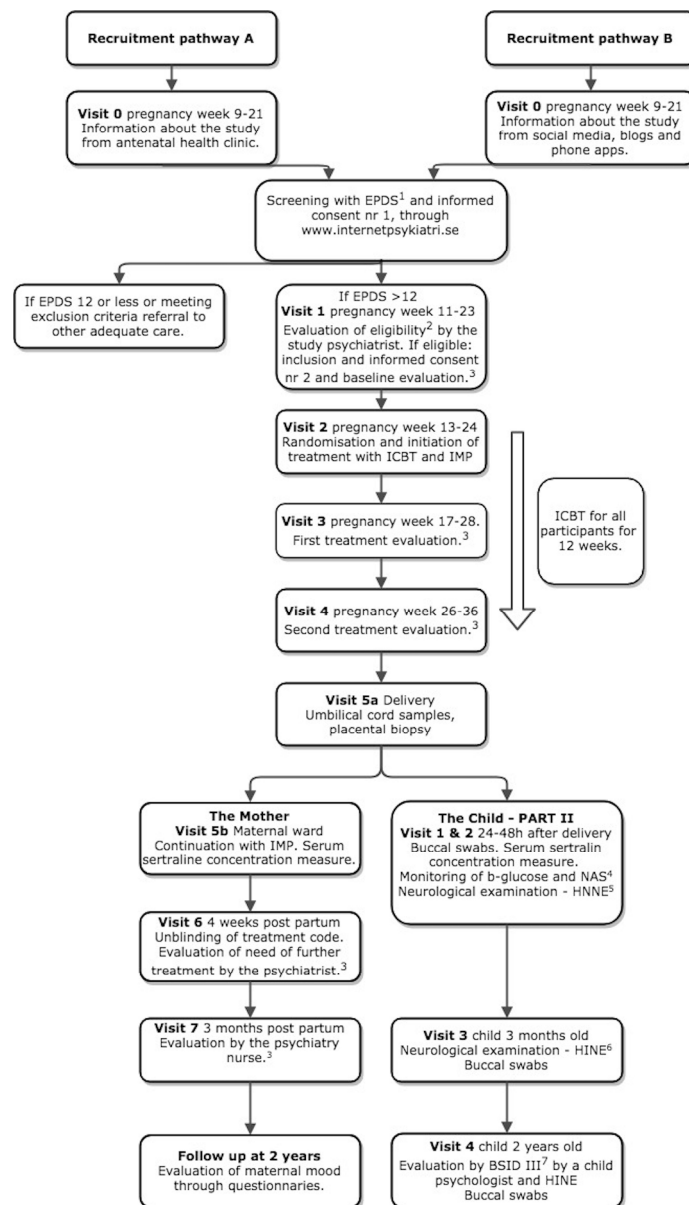

Figure 1. Trial design and participant timeline for the two recruitment pathways. The figure also shows the treatment with placebo/sertraline from visit 2 (pregnancy week 13-24) to visit 6 (4 weeks postpartum) and the ICBT for both groups for 12 weeks, between visit 2 and visit 4 (pregnancy week 26-36) and monitoring of therapy for the two groups. The post-partum follow-up of both mother and child are shown. The different scales and examinations are, as presented in the figure: 1) Edinburgh Postnatal Depression Scale (EPDS)<sup>39</sup>, 2) Diagnosis of moderate depression is confirmed according to clinical standard evaluation. Inclusion and exclusion criteria presented in table 1. 3) Evaluation with Montgomery-Åsberg Depression Scale (MADRS)<sup>40</sup>, 4) Modified Finnegan Neonatal Abstinence Scale (NAS)<sup>41</sup>, 5) Hammersmith Neonatal Neurological Examination (HNNE)<sup>42</sup>, 6) Hammersmith Infant Neurological Examination (HINE)<sup>43</sup>, 7) Bayley Scales of Infant and Toddler Development III® (BSID III®)<sup>44</sup>.

275x403mm (300 x 300 DPI)

1  
2  
3  
4  
5  
6  
7  
8  
9  
10  
11  
12  
13  
14  
15  
16  
17  
18  
19  
20  
21  
22  
23  
24  
25  
26  
27  
28  
29  
30  
31  
32  
33  
34  
35  
36  
37  
38  
39  
40  
41  
42  
43  
44  
45  
46  
47  
48  
49  
50  
51  
52  
53  
54  
55  
56  
57  
58  
59  
60

For peer review only

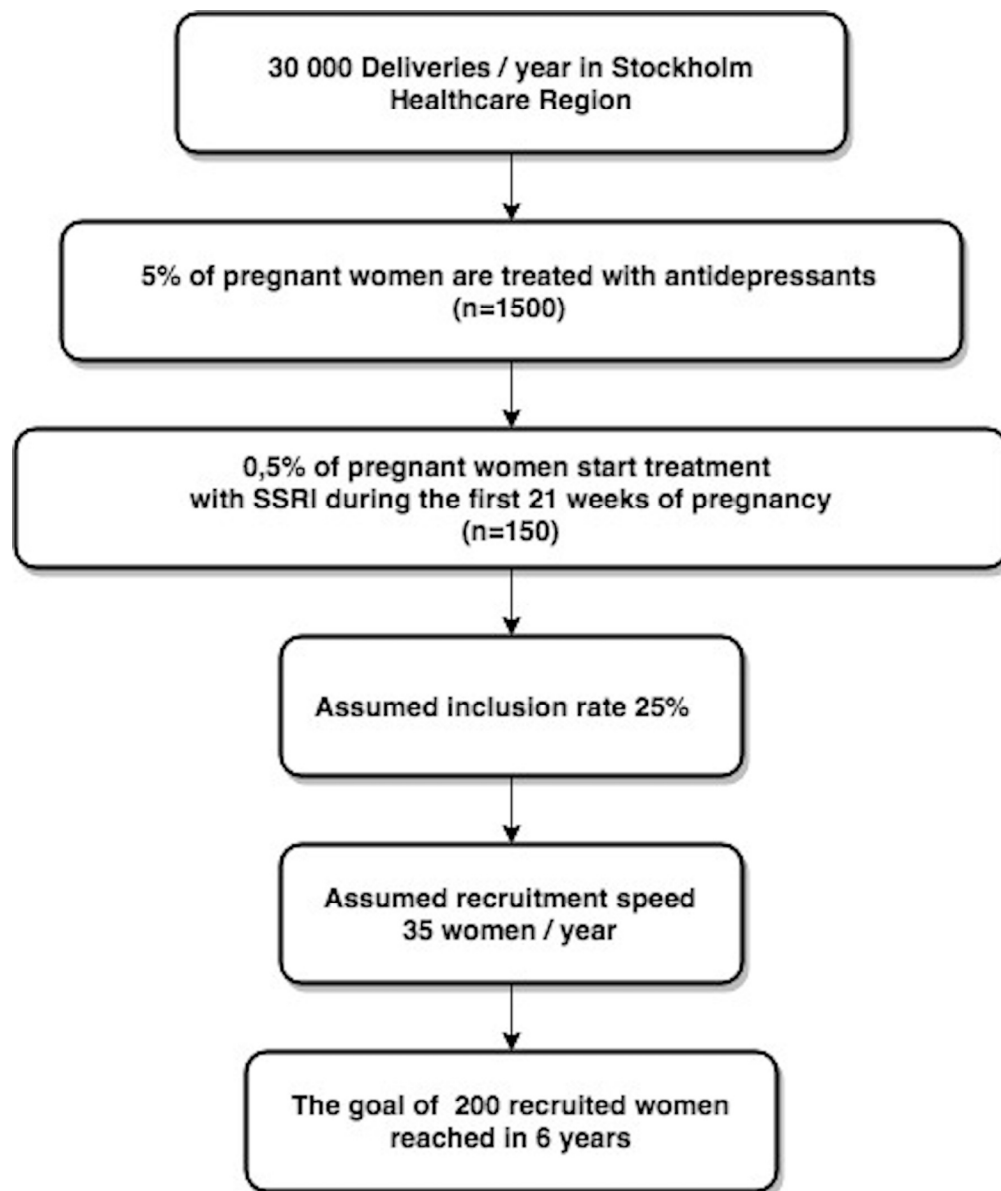

Figure 2. The recruitment base in Stockholm Healthcare Region. Numbers based on an analysis of prescription of SSRI:s in pregnant women in years 2013-2016 in the Stockholm healthcare region with 2,3 million inhabitants. See Acknowledgements.

153x181mm (300 x 300 DPI)

EudraCT No: 2013-004444-31

# **Effects and consequences for mother and child from treatment for depression**

***A prospective randomised, placebo- controlled, trial with internet-based cognitive behaviour therapy and sertraline or placebo for moderate depression in pregnancy***

Product: Zoloft® 25 mg

Substance: Sertraline

Phase of development *Phase IV*

Protocol number: *KWMP 001*

EudraCT Number: *2013-004444-31*

Sponsor: Mats Blennow, Department of Neonatology, Karolinska University Hospital and Karolinska Institutet (KI)

Coordinating PI: Katarina Wide, Department of Paediatrics, Karolinska University Hospital and KI

Principal Investigators: L. L. Gustafsson (Department of Laboratory Medicine, KI),  
M-L Dahl (Department of Laboratory Medicine, KI),  
J. Nasiell (CLINTEC, KI)  
V. Kaldo (Department of Clinical Neuroscience, KI)

EudraCT No: 2013-004444-31

Date: 2014-5-11 rev 20160307, rev 20161121, rev 20180406

Status: FINAL

Version: 5.0, 5.1A, 5.2, 5.3

1(27)



**Table of Contents**

**PROTOCOL SUMMARY**.....4

**ABBREVIATIONS** .....6

**SIGNED AGREEMENT OF THE TRIAL PROTOCOL** .....7

**1 THE DISEASE AND BACKGROUND INFORMATION** .....8

    1.1 MOOD DISORDERS AND PHARMACOTHERAPY DURING PREGNANCY .....8

**2 TRIAL RATIONALE** .....9

**3 OBJECTIVES** ..... 10

    3.1 PRIMARY OBJECTIVE ..... 10

    3.2 SECONDARY OBJECTIVE ..... 10

    3.3 TERTIARY OBJECTIVES ..... 10

**4 ENDPOINTS** ..... 10

    4.1 PRIMARY ENDPOINT..... 10

    4.2 SECONDARY ENDPOINT ..... 10

    4.3 TERTIARY ENDPOINTS..... 11

**5 DESIGN** ..... 11

    5.1 OUTLINE ..... 11

    5.2 SELECTION OF SUBJECTS ..... 13

    5.3 RECRUITMENT BASE ..... 14

**6 ASSESSMENTS AND PROCEDURES** ..... 14

    6.1 VISIT 0 (DAY -28 +-7DAYS WEEKS BEFORE START OF TREATMENT) 'INFORMED CONSENT'# 1 ..... 14

    6.2 PHONE CONTACT (DAY -21 DAYS +- 14 DAYS BEFORE START OF TREATMENT) 'NURSE FOLLOW-UP' 15

    6.3 VISIT 1 (DAY-14 +- 7DAYS BEFORE START OF IMP) 'PSYCHIATRIST, INFORMED CONSENT #2' ..... 15

    6.4 PHONE CONTACT (DAY -4 DAYS +- 2 BEFORE START OF TREATMENT) 'NURSE FOLLOW-UP' ..... 16

    6.5 VISIT 2 (DAY 0 START OF TREATMENT), 'BASELINE, RANDOMISATION & TREATMENT START' ..... 16

    6.6 VISIT 3 (WEEK 4 +- 6 DAYS) 'FIRST TREATMENT EVALUATION' ..... 17

    6.7 VISIT 4 (WEEK 14 +- 6 DAYS) 'SECOND TREATMENT EVALUATION' ..... 18

    6.8 VISIT 5 (WEEK 18 +- 6 DAYS) 'AT DELIVERY' ..... 18

    6.9 VISIT 6 (WEEK +22 +- 6 DAYS) 'FOUR WEEKS AFTER DELIVERY' ..... 18

    6.10 VISIT 7 (WEEK + 30 +- 2 WEEKS) '3 MONTHS AFTER DELIVERY' ..... 19

**PART II: THE CHILD BORN TO A MOTHER IN THE STUDY** ..... 19

    6.11 VISIT 1 (+24 HOURS TO 48H AFTER DELIVERY) STUDY PAEDIATRICIAN ..... 19

    6.12 VISIT 2 (+ 48 HOURS AFTER DELIVERY) STUDY PAEDIATRICIAN ..... 19

    6.13 VISIT 3 (CHILD AT THREE MONTHS OF AGE) STUDY PAEDIATRICIAN AND 'NURSE FOLLOW-UP'= VISIT 7 FOR THE WOMEN..... 20

    6.14 VISIT 4 (CHILD AT TWO YEARS OF AGE) TO CHILD PSYCHOLOGIST AND STUDY PAEDIATRICIAN ..... 20

**7 WITHDRAWAL OF SUBJECTS** ..... 20

    7.1 CRITERIA FOR WITHDRAWAL ..... 20

**8 TREATMENT**..... 20

    8.1 DESCRIPTION OF INVESTIGATIONAL MEDICINAL PRODUCTS (IMP) ..... 20

EudraCT No: 2013-004444-31

Date: 2014-5-11 rev 20160307,rev 20161121, rev 20180406

Status: FINAL

Version: 5.0,5.1A, 5.2, 5.3

2(27)

1  
2  
3  
4  
5  
6  
7  
8  
9  
10  
11  
12  
13  
14  
15  
16  
17  
18  
19  
20  
21  
22  
23  
24  
25  
26  
27  
28  
29  
30  
31  
32  
33  
34  
35  
36  
37  
38  
39  
40  
41  
42  
43  
44  
45  
46  
47  
48  
49  
50  
51  
52  
53  
54  
55  
56  
57  
58  
59  
60

KTA-M032 2012-04-

|    |                   |                                                           |
|----|-------------------|-----------------------------------------------------------|
| 1  |                   |                                                           |
| 2  |                   |                                                           |
| 3  |                   |                                                           |
| 4  |                   |                                                           |
| 5  |                   |                                                           |
| 6  |                   |                                                           |
| 7  |                   |                                                           |
| 8  |                   |                                                           |
| 9  |                   |                                                           |
| 10 |                   |                                                           |
| 11 | 8.2               | TREATMENT ASSIGNMENT ..... 21                             |
| 12 | 8.3               | BLINDING AND CODE BREAKING ..... 21                       |
| 13 | <b>9</b>          | <b>ALLOCATION TO TREATMENT ..... 21</b>                   |
| 14 | 9.1               | PRIOR AND CONCOMITANT MEDICATION ..... 21                 |
| 15 | 9.2               | COMPLIANCE TO TREATMENT & PRODUCT ACCOUNTABILITY ..... 22 |
| 16 | 9.3               | CONTINUATION OF TREATMENT ..... 22                        |
| 17 | <b>10</b>         | <b>ASSESSMENT OF EFFICACY AND SAFETY ..... 22</b>         |
| 18 | 10.1              | CLINICAL SAFETY ASSESSMENTS ..... 22                      |
| 19 | 10.2              | LABORATORY SAFETY ASSESSMENTS ..... 23                    |
| 20 | <b>11</b>         | <b>PROCEEDINGS FOR ADVERSE EVENTS ..... 23</b>            |
| 21 | 11.1              | DEFINITION OF ADVERSE EVENTS ..... 23                     |
| 22 | <b>12</b>         | <b>DATA MANAGEMENT ..... 24</b>                           |
| 23 | 12.1              | STATISTICAL ANALYSIS ..... 24                             |
| 24 | 12.2              | DETERMINATION OF SAMPLE SIZE ..... 24                     |
| 25 | 12.3              | ANALYSIS OF RISK –BENEFIT ..... 25                        |
| 26 | 12.4              | CONTROL OF QUALITY AND GUARANTEE OF QUALITY ..... 25      |
| 27 | 12.5              | INSURANCE OF PATIENTS ..... 25                            |
| 28 | <b>REFERENCES</b> | <b>..... 26</b>                                           |
| 29 |                   |                                                           |
| 30 |                   |                                                           |
| 31 |                   |                                                           |
| 32 |                   |                                                           |
| 33 |                   |                                                           |
| 34 |                   |                                                           |
| 35 |                   |                                                           |
| 36 |                   |                                                           |
| 37 |                   |                                                           |
| 38 |                   |                                                           |
| 39 |                   |                                                           |
| 40 |                   |                                                           |
| 41 |                   |                                                           |
| 42 |                   |                                                           |
| 43 |                   |                                                           |
| 44 |                   |                                                           |
| 45 |                   |                                                           |
| 46 |                   |                                                           |
| 47 |                   |                                                           |
| 48 |                   |                                                           |
| 49 |                   |                                                           |
| 50 |                   |                                                           |
| 51 |                   |                                                           |
| 52 |                   |                                                           |
| 53 |                   |                                                           |
| 54 |                   |                                                           |
| 55 |                   |                                                           |
| 56 |                   |                                                           |
| 57 |                   |                                                           |
| 58 |                   |                                                           |
| 59 |                   |                                                           |
| 60 |                   |                                                           |

EudraCT No: 2013-004444-31

Date: 2014-5-11 rev 20160307, rev 20161121, rev 20180406

Status: FINAL

Version: 5.0, 5.1A, 5.2, 5.3

3(27)

1  
2  
3  
4  
5  
6  
7  
8  
9  
10  
11 **PROTOCOL SUMMARY**  
12

13 **PROTOCOL IDENTITY AND OBJECTIVES**

14 EudraCT Number: 2013-004444-31  
15 Protocol Title: Effects and consequences for mother and  
16 child from treatment for depression. A  
17 prospective randomised, placebo-  
18 controlled, trial with internet-based  
19 cognitive behaviour therapy and sertraline  
20 or placebo for moderate depression in  
21 pregnancy

22 **Trial Objectives:**

23 **Primary objective**

24 To study the long-term consequences on  
25 cognitive development in children  
26 exposed to sertraline during pregnancy.

27 **Secondary objective**

28 To study if the effect of ICBT for pregnant  
29 women with moderate depression can be  
30 increased by adding sertraline

31 **Tertiary objectives**

- 32 a) To study the direct neonatal effects in  
33 children prenatally exposed to maternal  
34 sertraline treatment compared to  
35 exposure to maternal depression treated  
36 with only ICBT.  
37 b) To study if add-on treatment with  
38 sertraline increases the risk for maternal  
39 bleeding and pregnancy complications  
40 c) To study pharmacokinetic and genetic  
41 variations in the metabolism of sertraline  
42 in pregnant women and their children  
43 d) To study associations between  
44 antenatal maternal depression and  
45 inflammatory and epigenetic changes in  
46 relation to treatment effects of SSRI in  
47 mother and child

48 **INVESTIGATIONAL MEDICINAL PRODUCTS**

49 Test Product: Sertraline, 25 mg and placebo  
50 Pharmaceutical Form: Tablets  
51 Route of Administration: Orally

52 EudraCT No: 2013-004444-31

53 Date: 2014-5-11 rev 20160307, rev 20161121, rev 20180406

54 Status: FINAL

55 Version: 5.0, 5.1A, 5.2, 5.3

4(27)

1  
2  
3  
4  
5  
6  
7  
8  
9  
10  
11  
12  
13  
14  
15  
16  
17  
18  
19  
20  
21  
22  
23  
24  
25  
26  
27  
28  
29  
30  
31  
32  
33  
34  
35  
36  
37  
38  
39  
40  
41  
42  
43  
44  
45  
46  
47  
48  
49  
50  
51  
52  
53  
54  
55  
56  
57  
58  
59  
60**METHODOLOGY**

**Trial Design:** Prospective, double blind, two armed, parallel clinical study

**Dose/Duration:** 25 mg, 50 mg, 75 mg, 100 mg and 150 mg for max 33 weeks

**Primary Endpoint:** The differences in cognitive development at 2 years evaluated by the standard Bayley Scales of Infant and Toddler Development third edition (BSID-III)\*.

**Sample Size calculations:** To detect a difference of 7 points (SD 0.5) with a power of 80% ( $\alpha$ : 0, 05) in the results in BSID-III. To detect a clinically significant difference, will require a sample of 73 participants in each group. Therefore 100 participants in each group would be appropriate.

**Efficacy Parameters:** MADRS-S ,MADRS,EPDS

**Safety Parameters:** Adverse events, MADRS- S;MADRS, EPDS

**POPULATION OF TRIAL SUBJECTS**

**Description of Trial Subjects:** Pregnant women with an untreated moderate depression according to SCID-I.

**Number of Subjects:** N=200,receiving treatment with ICBT parallel arms 1:1  
N= 100 receive active drug treatment N= 100 placebo

**Selection of subjects:** Pregnant women, attending an antenatal clinic and planning to deliver at Karolinska University Hospital or other delivery clinics in Stockholm Healthcare Region which will be added when study is ongoing (path A). The pregnant women can also be recruited via social media and internet (path B).

**TRIAL TIMETABLE**

**First Subject In:** Q 1 2016

**Last Subject In:** Q4 2022

**Last Subject Out:** Q4 2024

**Study End** Q1 2025

**Database lock** Q4 2024

**STATISTICAL METHODS**

**Outcome assessments:**  
Descriptive statistics will be assessed on patients' demographics. Adverse events will be reported in proportions in relation to

EudraCT No: 2013-004444-31

Date: 2014-5-11 rev 20160307,rev 20161121, rev 20180406

Status: FINAL

Version: 5.0, 5.1A, 5.2, 5.3

5(27)

1  
2  
3  
4  
5  
6  
7  
8  
9  
10  
11  
12  
13  
14  
15  
16  
17  
18  
19  
20  
21  
22  
23  
24  
25  
26  
27  
28  
29  
30  
31  
32  
33  
34  
35  
36  
37  
38  
39  
40  
41  
42  
43  
44  
45  
46  
47  
48  
49  
50  
51  
52  
53  
54  
55  
56  
57  
58  
59  
60

active/placebo dose. Primary end point will be analysed in multivariate analyses (MVA).

**NOTE ABOUT APPENDICES**

The appendices to this study protocol (APPENDIX TO MAGDALENA STUDY PROTOCOL PUBLISHED IN BMJ OPEN year:volume:pages) including the informed consent forms are in Swedish. They are available at request from the corresponding author.

**Kommenterad [EH1]:** Please add the publication details here.

**ABBREVIATIONS**

| Abbreviation | Explanation                                                |
|--------------|------------------------------------------------------------|
| AE           | Adverse Event                                              |
| AUDIT        | The Alcohol Use Disorder identification test               |
| BSID III®    | Bayley Scale of Infant and Toddler Development III ®       |
| CBT          | Cognitive Behaviour Therapy                                |
| CGI-S        | Clinical global impression scale                           |
| CRF          | Case Report Form                                           |
| CSQ          | Client Satisfaction Questionnaire                          |
| DMC          | Data Monitoring and Safety Committee                       |
| DUDIT        | The Drug Use Disorder Identification Test                  |
| EPDS         | Edinburgh Postnatal Depression scale                       |
| EQ-5D        | Europe Quality of Life                                     |
| HINE         | Hammersmith Infant Neurology Examination                   |
| HNNE         | Hammersmith Neonatal Neurology Examination                 |
| ICBT         | Internet-based Cognitive Behaviour Therapy                 |
| IMP          | Investigational Medicinal Products                         |
| ISI          | Insomnia Severity Index                                    |
| MADRS-S      | Montgomery Åsberg Depression (Self-Assessment Scale)       |
| MADRS        | Montgomery Åsberg Depression (Evaluator Assessment Scale)  |
| MAMA         | Maternal Adjustment and Attitudes scale 12 questions       |
| MPA          | Medicinal Product Agency                                   |
| MPAS         | Maternal Postnatal Attachment Scale                        |
| NAS          | Neonatal Abstinence Score                                  |
| PAI          | Prenatal Attachment Inventory                              |
| PSQ          | Premenstrual Syndrome Questionnaires                       |
| SAE          | Serious Adverse Event                                      |
| SCID-I       | Structured Clinical Interview according to DSM-IV R part I |
| SDQ          | Strengths and Difficulties Questionnaire                   |
| SPC          | Summary of Product Characteristics                         |
| SUSAR        | Suspected Unexpected Serious Adverse Reaction              |
| TCQ          | Treatment Credibility Questionnaire                        |

EudraCT No: 2013-004444-31

Date: 2014-5-11 rev 20160307, rev 20161121, rev 20180406

Status: FINAL

Version: 5.0, 5.1A, 5.2, 5.3

6(27)

1  
2  
3  
4  
5  
6  
7  
8  
9  
10  
11 **SIGNED AGREEMENT OF THE TRIAL PROTOCOL**  
12  
13

14 **Statement of compliance**

15  
16 I have read and understood this protocol version 5.3 dated: 2018-04-06 with the study title: ***'Effects and***  
17 ***consequences for mother and child from treatment for depression. A prospective randomised, placebo-***  
18 ***controlled trial with internet-based cognitive behaviour therapy and sertraline or placebo for***  
19 ***moderate depression in pregnancy.*** I agree to conduct the study accordingly.  
20  
21  
22  
23  
24

25 ***Coordinating Principle Investigator***

26 *Katarina Wide, PhD, associate professor*

27 Department of Paediatrics

28 ALB

29 Karolinska Universitetssjukhuset, Huddinge  
30  
31

32 \_\_\_\_\_  
33 Date 180406  
34

35 ***Sponsor***

36 *Mats Blennow, Professor*

37 Department of Neonatology

38 ALB

39 Karolinska Universitetssjukhuset, Huddinge  
40  
41

42 \_\_\_\_\_  
43 Date 180406  
44  
45  
46  
47  
48  
49  
50  
51

52 EudraCT No: 2013-004444-31

53 Date: 2014-5-11 rev 20160307, rev 20161121, rev 20180406

54 Status: FINAL

55 Version: 5.0, 5.1A, 5.2, 5.3

7(27)

## 1 THE DISEASE AND BACKGROUND INFORMATION

Depression occurs in 5-10% of all pregnant women.[1, 2] The prevalence is increased during the pregnant-state compared to the non-pregnant state as well as during the first three months after delivery[1, 3, 4] and can predispose to suicide.[5, 6] In addition, depression increases the risk for preeclampsia and premature delivery.[7] Also a disturbed attachment between mother and child in the new-born period has been reported.[7] Selective serotonin reuptake inhibitors (SSRI) are a class of medicines widely used to treat a number of psychiatric disorders. The Swedish national guidelines to treat pregnant women with moderate depression recommend cognitive behaviour therapy (CBT), interpersonal psychotherapy, or treatment with SSRI.[6] Even though there is substantial evidence supporting the effectiveness of CBT in non-pregnant patients the majority of patients are not treated at all. When medical treatment is used it is usually with SSRI. Only a few studies have assessed the effectiveness of CBT in perinatal depression.[8] In antenatal and postnatal major depression combination treatment with CBT and antidepressants appear to be more effective than antidepressant medication alone, whereas antidepressant therapy alone appears more effective than CBT alone.[9]

An increasingly used alternative to traditional CBT in individual or group format is treatment with a web-based self-help program with active therapist support via the Internet, i.e. internet-based cognitive behaviour therapy (ICBT). The content is not different from regular CBT but is delivered in a different way. ICBT has been shown to be efficient for a range of conditions including depression,[10] with effects comparable to traditional CBT[11] and also producing positive effects when implemented in regular care.[12] The treatment is provided via a secure website where the patients log in to receive the treatment material, usually in the form of separate 'treatment modules' with text and media where the target problem and treatment methods are described and homework assignments are given.[13] The ICBT therapeutic protocol in this study has been modified to pregnant women both in length and in contents.[8] The main function for the therapist is to be supportive and clarify the information, review the progress, give participants feedback, and assist and remind participants not working actively with the treatment. Gradually the therapists guide the participants to access the treatment modules in a specific order. The patient and the therapist work cooperatively with the ICBT components making them relevant in patient's everyday life. Each module, and especially the homework related to the module, is examined by a set of questions. Patients receive feedback from the therapist after each module and also have the opportunity to ask questions when needed. ICBT has been found to be effective in several randomised controlled trials in patients with a long range of psychiatric and medical problems, including moderate depression.[10] ICBT has the potential to be more cost-effective and accessible compared to traditional formats.

### 1.1 Mood Disorders and Pharmacotherapy During Pregnancy

In clinical practice the standard management of pregnant women with moderate depression is treatment with SSRI. Serotonin crosses the placenta and enters the fetal circulation which can influence the fetal brain. Effects on the developmental process of serotonin on the fetal brain have been shown in animal studies.[14, 15] Effects similar to the 'serotonergic syndrome' observed in adults have been reported in newborns exposed to SSRIs prenatally. These infants display symptoms of jitteriness, irritability, difficulties to maintain body temperature, feeding difficulties and in some cases even seizures.[15] Even though studies have not shown any increased risk for malformations in children exposed to SSRI in fetal life several reports and large registry based studies indicate an increased risk for neonatal complications.[16-20] The SSRI-drug sertraline that is commonly used during pregnancy shows wide variation in plasma concentrations between subjects - up to 15-fold for the same dose in non-pregnant subjects. The concentration of the main demethylated metabolite with limited inhibitor effect on serotonin reuptake exceeds that of sertraline itself. No clear relationship between either effect or

EudraCT No: 2013-004444-31

Date: 2014-5-11 rev 20160307, rev 20161121, rev 20180406

Status: FINAL

Version: 5.0, 5.1A, 5.2, 5.3

8(27)



1  
2  
3  
4  
5  
6  
7  
8  
9  
10  
11 adverse events are demonstrated for sertraline. Data on the disposition of sertraline during pregnancy is  
12 limited. Polymorphisms of the sertraline metabolizing enzyme CYP2C19 might explain the variability in  
13 drug concentrations between patients.[21] The role of genetic factors for the variability of plasma  
14 sertraline concentrations is poorly known in pregnant women as well as the role of the pregnancy itself  
15 on drug disposition.

16 Maternal depression as such may also have an effect on the central nervous system and the autonomic  
17 regulation in the new-born infant, induced by physiological changes as increased levels of plasma  
18 cortisol. Maternal depression and anxiety seem to inhibit the placental enzyme (11-beta-hydroxysteroid  
19 dehydrogenase) activity, causing increased and potentially toxic levels of cortisol in the fetus.[22]  
20 Furthermore, epigenetic mechanisms such as DNA methylation of cortisol, glucocorticoid and serotonin  
21 receptors and their pathways may be involved.

22 Also telomere biology may be involved in increased vulnerability to disease in the infant.[17] Epigenetic  
23 changes with reduced telomere length in leucocytes have been shown in patients with depression. Pre-  
24 and perinatal stressors in children have also been shown to effect telomere length.[22-24] Epigenetic  
25 changes in depression may be related to inflammatory and hormonal factors and seem to be reversible  
26 by treatment.[25]

27 Maternal stress factors may therefore contribute to changed neurotransmission in the developing fetal  
28 brain. Data on the long-term consequences of the unborn child's cognitive development after prenatal  
29 exposure to SSRI and/or maternal stress are scarce. Only a few studies using small study samples have  
30 been published.[26-31]

## 31 2 TRIAL RATIONALE

32  
33 The etiology of depression during pregnancy is unknown. Pregnancy-related physical and hormonal  
34 changes as well as psychosocial stressors might render women vulnerable for stress activation. Despite  
35 lack of scientific evidence for pharmacological and psychological treatment of antepartum moderate  
36 depression, CBT is recommended as first choice treatment (The National Board of Health and Welfare,  
37 National guideline for Depression). CBT is generally less available and as a consequence the majority of  
38 pregnant women with moderate depression are not treated at all. The ones who receive treatment are  
39 recommended SSRI. International meta-analyses suggest greater effect when combining traditional  
40 psychological and pharmacotherapy. To our knowledge no prior placebo-controlled clinical trials have  
41 assessed if combination treatment is superior to treatment with internet-based CBT alone. Research  
42 concerning physiological and psychological factors that negatively influence the unborn child and  
43 maternal well-being are crucial to investigate.

44 This study targets women with moderate depression during pregnancy. We will use ICBT with or without  
45 SSRI in a randomised placebo-controlled trial. This study can help to fill the gap of knowledge on the  
46 consequences of antidepressive therapy for the children as well as in field of maternal treatment of  
47 depression. The study is divided into two parts 1) The pregnant women with moderate depression and  
48 2) the children born to the women with moderate depression. Our research group has worked  
49 extensively with ICBT and has a large experience and publications of this treatment.

50 The **overall aim** is to study the neonatal effects and the long-term consequences on cognitive  
51 development in children exposed to sertraline for maternal depression during pregnancy. We also seek  
52 to optimize the treatment of depression in pregnant women by comparing the add-on efficacy and

53 EudraCT No: 2013-004444-31

54 Date: 2014-5-11 rev 20160307, rev 20161121, rev 20180406

55 Status: FINAL

56 Version: 5.0, 5.1A, 5.2, 5.3

9(27)

1  
2  
3  
4  
5  
6  
7  
8  
9  
10  
11 safety of a combination of internet-based cognitive behaviour therapy (ICBT) and SSRI-treatment with  
12 ICBT-therapy alone.

### 13 14 15 **3 OBJECTIVES**

#### 16 17 **3.1 Primary Objective**

18 The primary objective is to study the long-term consequences on cognitive development in children  
19 prenatally exposed to maternal sertraline treatment compared to exposure to maternal depression  
20 treated with only ICBT.

#### 21 22 **3.2 Secondary Objective**

23 The secondary objective is to evaluate the safety and the efficacy of sertraline in addition to treatment  
24 with ICBT.

#### 25 26 **3.3 Tertiary Objectives**

27 These include:

- 28 a) To study the direct neonatal effects in children prenatally exposed to maternal sertraline treatment  
29 compared to exposure to maternal depression treated with only ICBT.
- 30 b) To study if add-on treatment with sertraline increases the risk for maternal bleeding and pregnancy  
31 complications.
- 32 c) To study pharmacokinetic and genetic variations in the metabolism of sertraline in pregnant women  
33 and their children.
- 34 d) To study associations between antenatal maternal depression and inflammatory, epigenetic and  
35 telomere biology changes in relation to treatment effects of SSRI in mother and child.

### 36 37 **4 ENDPOINTS**

#### 38 39 **4.1 Primary Endpoint**

40 Cognitive development at 2 years of age evaluated by the standard Bayley Scales of Infant and Toddler  
41 Development v 3 (BSID-III) in children exposed to maternal treatment with ICBT and sertraline compared  
42 to exposure to ICBT only.

#### 43 44 **4.2 Secondary Endpoint**

45 Add-on effect of sertraline measured in difference i) in self-report of depressive symptoms (MADRS-S), ii)  
46 in rate of remission from depression (measured by diagnostic psychiatric interview with MADRS at 12  
47 weeks, 14 weeks, and 30 weeks (= 3 months postpartum) of treatment.

48  
49  
50  
51 EudraCT No: 2013-004444-31

52 Date: 2014-5-11 rev 20160307, rev 20161121, rev 20180406

53 Status: FINAL

54 Version: 5.0, 5.1A, 5.2, 5.3

55 10(27)

### 4.3 Tertiary Endpoints

These are the exploratory parts of the study.

- a) To study the neonatal effects in children exposed to sertraline during pregnancy
  - Differences in admission rates to neonatal care units will be compared between groups. Infant motor behaviour examined with standardized methods (HNNE) and neonatal abstinence effects are scored with NAS.
- b) To study if add-on treatment with sertraline increases the risk for maternal bleeding and pregnancy complications
  - Evaluation of the risk for maternal postpartum bleeding in ml and postpartum haemoglobin day 2. APTT/TPK and placenta biopsy for evaluation of genetic differences in activity of 11-beta-hydroxysteroid dehydrogenase type 2 and in pharmacological metabolism, DNA methylation for telomere length and telomerase activity.
  - Evaluation of the risk for the pregnancy complications preeclampsia, placental abruption and increased caesarean section rate.
- c) To study pharmacokinetic and genetic variations in the metabolism of sertraline in pregnant women and their children
  - Plasma concentrations of sertraline and genetic variations in the metabolism of sertraline, genetic variants of metabolizing enzymes/transporters. The pharmacological and pharmacokinetic assessments include: plasma sertraline concentrations, effects of various genetic variants controlling drug metabolising and drug transporters on sertraline disposition and metabolism. Exploration of relationship between plasma sertraline concentrations and prolactin levels.
- d) To study associations between antenatal maternal depression and inflammatory and epigenetic changes in relation to treatment effects of SSRI in mother and child
  - Effects on levels of s-hCG and cytokines. Telomerase activity through the umbilical vein and buccal swabs for analysis of epigenetic variables and telomere biology. Epigenetic and telomere biology assessments: DNA methylation, telomere length and telomerase activity

## 5 DESIGN

### 5.1 Outline

This is a prospective, randomised, placebo-controlled, double blind, two parallel, single centre clinical investigation of pregnant women with moderate depression with multiple delivery units. The subjects will visit the centre approximately 6 times during a period of 13 months from early-mid pregnancy until two years after delivery. The patients are recruited via two paths; (A) from the antenatal clinics in Stockholm Healthcare Region (2,3 million people) and (B) via a direct application and screening on the internet, where an initial telephone interview is used for screening, to ensure they have contact with regular antenatal care and to book an appointment with a psychiatrist.

EudraCT No: 2013-004444-31

Date: 2014-5-11 rev 20160307, rev 20161121, rev 20180406

Status: FINAL

Version: 5.0, 5.1A, 5.2, 5.3

11(27)

1  
2  
3  
4  
5  
6  
7  
8  
9  
10  
11 All subjects will be consented before any study-specific procedures and assessed for eligibility within  
12 three to five weeks and consented for treatment one week before treatment start. The screening period  
13 in regular care (path A) starts when the pregnant women attend the antenatal clinic (pregnancy week 9-  
14 21). They will obtain written and oral information about the study through their attending midwife and  
15 are asked to fill in the Edinburgh Postnatal Depression Scale (EPDS) to screen for potential depressive  
16 disorder. Women will be informed that they at this stage only consent to participate in screening and if  
17 the screening is positive to be contacted for psychiatric assessment (verbal informed consent #1, which  
18 covers only the initial, non-pharmacological, part of the study). They will receive information about how  
19 to assess the internet-based screening questionnaires (MADRS-S, STAI, AUDIT, DUDIT, EQ5D, ISI),  
20 questions on previous somatic and psychiatric health issues, sociodemographic factors and questions on  
21 perceived health of the participant's partner. Before completing these forms, they have to read and  
22 agree to the written informed consent #1. Women screening positive for potential depression (EPDS >12  
23 points) will be contacted by a research nurse specialized in psychiatry for a second evaluation of  
24 eligibility and scheduled for a visit to the study psychiatrist. The optimal cut-off score on the EPDS scale  
25 for screening purposes is 13 or more points (standard error coefficient of 1.09 and c-statistics of 0.84)  
26 which have been shown to give 77% sensitivity.[32]

25 Women recruited directly via internet (path B) will start by completing a slightly modified version of the  
26 written informed consent #1 and then complete the same internet-based screening questionnaires, with  
27 some additional questions. Women are then contacted via telephone for further screening, including all  
28 questions asked at the antenatal clinic in recruitment path A and confirming that they are receiving  
29 regular maternal care. Women not suitable for inclusion are referred to regular health care services if  
30 needed. Eligible women are booked for a time to visit the psychiatrist.

31 After assessment and information about the study by the study psychiatrist, the women will sign an  
32 informed consent (informed consent #2, covering the rest of the study). Treatment with ICBT and  
33 randomised treatment with either active treatment with sertraline or placebo will start after the  
34 internet-based screening questionnaires have been completed in conjunction with a visit to the study  
35 centre approximately one week later. Women uncertain about participation at the time of psychiatric  
36 assessment are offered to discuss with the study obstetrician when visiting the study centre one week  
37 later where they can provide informed consent (informed consent #2).

38 The research nurse in psychiatry or the research midwife will make a telephone call within 1 week after  
39 the first visit to schedule an appointment at the study site and address any difficulties to assess the  
40 internet treatment platform.

41 Once included the patients will have scheduled visits to the specialists' antenatal clinic at Karolinska  
42 University Hospital Huddinge or at other participating centres to measure vital signs, blood sample  
43 collection, accountability of IMP and adverse event report. The last visit is performed 12 weeks after  
44 delivery.

45 When starting ICBT by logging in on the internet-treatment platform after randomisation, pre-treatment  
46 self-report measures will be completed (MADRS-S, STAI-s, ISI, EQ5D, Life Events, PSQ, PAI, MAMA). At  
47 the follow-up after the delivery the women are asked to complete the MPAS, ISI, TCQ, client satisfactory  
48 questionnaire, questions on adverse events (AE), questionnaires on basic socio-demographic data and  
49 health as well as questions on how they experience the psychiatric status of their partner. This last  
50 questionnaire will be repeated 3 months after the delivery. During the 12-week internet-CBT treatment  
51 patients self-assess symptoms weekly with MADRS-S. Post ICBT-treatment (week 12), week 14 and week  
52 30 self-reports are also completed online.

53 A psychologist and a research nurse specialized in psychiatry will work closely together with a  
54 psychiatrist to assess the best psychiatric and safety management of the patients. The psychologist  
55 supervises and monitors each patient individually on a weekly basis during the 12 weeks of ICBT for an

56 EudraCT No: 2013-004444-31

57 Date: 2014-5-11 rev 20160307, rev 20161121, rev 20180406

58 Status: FINAL

59 Version: 5.0, 5.1A, 5.2, 5.3

60 12(27)

early detection of symptoms that indicate disease progress or improvement. Any symptoms that require further expertise and support by a psychiatrist will be considered. The psychiatrist will consider all aspects of the patients' well-being in a detailed assessment rating the strength of clinical evidence of stressors and psychiatric status and level of functioning at each visit to the clinic.

All visits to the study psychiatrist and interaction with the unit for Internet Psychiatry are documented in health care journals (Take Care® or Obstetrics®) or systems used on site according to routines and practices at the psychiatric services for Stockholm Healthcare Region and Karolinska University Hospital and at additional study sites.

## 5.2 Selection of Subjects

### Inclusion Criteria (all of the below)

1. Female > 18 years old
2. Pregnant, gestational week 9-21
3. Verified moderate depression according to SCID-I with or without concomitant anxiety disorder.
4. Signed informed consent
5. Able to understand the Swedish language orally and in written, write in Swedish and able to use the internet for the ICBT, including having succeeded in filling out online questionnaires.
6. Are willing to participate to all study visits
7. Plans to give birth at the Department of Obstetrics at Karolinska University Hospital, Huddinge or other delivery units within Stockholm Healthcare Region.

### Exclusion Criteria (any of the below)

1. Known drug or alcohol abuse
2. Serious psychiatric disorder such as psychosis, bipolar disorder, severe personality disorder, ADHD/ADD with diagnosis and symptoms in adult age, autism, mental retardation and severe melancholic or psychotic depression.
3. Known idiosyncrasy to sertraline (Zoloft®) or allergy to any of excipients in the Zoloft product
4. Ongoing drug therapy with antidepressants, mood-stabilizers, central stimulants, antiepileptic drugs, opiates, insulin, oral anti-diabetics, antiarrhythmics or steroids.
5. Any severe somatic disease that necessitates regular treatment with systemic steroids, severe heart and lung disease, kidney disease, liver disease, diabetes mellitus or epilepsy with drug treatment.
6. Women who either during screening or treatment on self-assessment forms (MADRS-S: 4 or more points on question about suicidal intention (question 9)) report symptoms of severe suicidal thoughts or suicide plans will be contacted for structured suicide risk assessment by telephone according to clinical routine at the unit for internet psychiatry. If judged necessary patients will be booked for psychiatric assessment by the study nurse. If urgent assessment or care is judged necessary, referral to psychiatric emergency departments will be made according to the same routine as in regular care.  
Also women, who contact the study personnel and report symptoms of suicidal thoughts or suicide plans will receive psychiatric assessment as specified above. Women who according to psychiatric assessment have a high suicidal risk will be excluded from the study. These women will be actively transferred into necessary psychiatric treatment as usual.

EudraCT No: 2013-004444-31

Date: 2014-5-11 rev 20160307, rev 20161121, rev 20180406

Status: FINAL

Version: 5.0, 5.1A, 5.2, 5.3

13(27)

- 1  
2  
3  
4  
5  
6  
7  
8  
9  
10  
11 7. Other factors that are clinically significant and could jeopardize study results or its intention, as  
12 judged by study psychiatrist or study obstetrician.  
13  
14

### 15 5.3 Recruitment Base

16 Concerning recruitment path A (via regular maternal care), with an estimated number of 30 000 annual  
17 deliveries in the Stockholm Healthcare Region and an estimated rate of depression among pregnant  
18 women of 5%, we expect 1500 pregnant women with depression in the catchment area. We estimate  
19 0,5%, 150 patients, starting treatment with SSRI during the first 21 weeks of pregnancy. An inclusion rate  
20 estimated to 1/4 results in recruiting 35 pregnant women/year for the study. The alternative  
21 recruitment path (B), via media and internet, will be used to increase the speed of inclusion.  
22 Since many years there is a special outpatient clinic for pregnant women with depression or anxiety at  
23 Karolinska University Hospital, Huddinge. The clinic is a joint venture between the Department of  
24 Obstetrics and Gynaecology and the Department of Psychiatry in Stockholm Healthcare Region.  
25

## 26 6 ASSESSMENTS AND PROCEDURES

### 27 6.1 Visit 0 (Day -28 +-7days weeks before start of treatment) 'Informed Consent'# 1

28 Pregnant patients planning to deliver at Karolinska University Hospital Huddinge or other delivery units  
29 within Stockholm Healthcare Region. They should be pregnant approximately in **gestational week 9-21**  
30 will be informed about the study during a regular visit to their antenatal health clinic by their attending  
31 midwife (recruitment path A). All these women (except those as specified in the exclusion criteria, see  
32 section 5.2 for details) will receive oral and written information about the nature of the trial by their  
33 attending midwife and agree to participate in the first part of the study (oral informed consent #1).  
34 At this stage, they will only agree to participation to screening and, if being screened positive, to  
35 complete more screening questionnaires via the internet and perform a visit for a diagnostic and clinical  
36 assessment by a psychiatrist. After the oral informed consent patients will be asked to complete the  
37 Edinburgh Postnatal Depression Scale (EPDS) to screen for potential depressive disorder. The written  
38 information about the trial will contain a description of the internet-CBT treatment and how to log on to  
39 the internet platform [www.internetpsykiatri.se](http://www.internetpsykiatri.se), where they will choose their personal password and  
40 register their mobile phone number to which they will get a text message with a temporary code for  
41 each time they log on to the internet platform. The EPDS will be collected and evaluated by the research  
42 midwife on a weekly basis. Women scoring >12p will be encouraged to obtain the login at  
43 [www.internetpsykiatri.se](http://www.internetpsykiatri.se) if they agree to participation in the study.  
44 Through [www.internetpsykiatri.se](http://www.internetpsykiatri.se) the women will log in to the internet platform at the Internet  
45 Psychiatry Unit at Psychiatry Southwest, used to administer web-based questionnaires and to later  
46 deliver ICBT. The advantage of the electronic system is that it can be accessed and used by patients from  
47 geographically different locations. On the internet platform they will complete the written informed  
48 consent #1 and then be asked to deliver information about their choice of delivery hospital, current drug  
49 therapy, current mental and somatic disorders, questions on perinatal current and previous somatic and  
50 mental symptoms. They are also to answer questions on perceived health of the participant's partner,  
51 practical questions on ability and suitability to take part in the study, and fill out the established self-  
52 report questionnaires PAI, AUDIT, DUDIT, MADRS-S, ISI, STAI, EQ5D, questionnaire on parity, number of  
53 children, country of birth and sociodemographic background. This will take about 30-45 minutes.  
54

51 EudraCT No: 2013-004444-31

52 Date: 2014-5-11 rev 20160307, rev 20161121, rev 20180406

53 Status: FINAL

54 Version: 5.0, 5.1A, 5.2, 5.3

14(27)

There is also a direct way to apply for participation in the study (recruitment path B). Here, women find information about the study in articles or advertisement in media or on the internet, and if interested they find more information at [www.magdalenastudien.se](http://www.magdalenastudien.se) from where they are guided to the alternative screening questionnaire at [www.internetpsykiatri.se](http://www.internetpsykiatri.se). This starts by completion of a slightly adapted version of the written informed consent #1, followed by the same internet-based screening-questionnaires, with the following added; EPDS, contact details, and questions about gestational week, pharmacological treatments, somatic conditions, language skills, computer skills, internet availability, age, current maternal care/clinic, and if they can accept having their delivery at the most nearby study centre. This will take about 40 to 60 minutes.

### 6.2 Phone contact (Day -21 days +- 14 days before start of treatment) 'Nurse follow-up'

**Patients are now in gestational week 10-22.** For women recruited via path A, the research nurse in psychiatry or the research midwife will contact the women who have screened positive (EPDS >12 points). The reason for this call is to do a new clinical assessment on the woman's health situation, to give the woman possibility to address questions about the study, and to check whether they were able to obtain log-in for the internet-CBT platform at [www.internetpsykiatri.se](http://www.internetpsykiatri.se). The women will be reminded to use the web-based self-assessment instruments if they have not already done that and are informed about the scheduled visit to the psychiatrist. More phone calls and text messages will be used to remind the women to fill out the web-based questionnaires. All women recruited via path B will be contacted via telephone when they have completed all internet questionnaires, for further information but also for further screening. The EPDS and all the inclusion criteria checked at the antenatal clinic in recruitment path A will be cross-checked. Eligible women are informed about the first scheduled visit to the psychiatrist.

Regardless of recruitment path, women with EPDS >12 points but not eligible according to inclusion and exclusion criteria will be offered to receive referral for psychiatric assessment. The research midwife/research psychiatric nurse will contact the woman's attending midwife and inform them where to refer the patient for further psychiatric assessment. The midwives keep a screening log of all subjects that have performed screening and will document in the screening log patients that decline further participation.

Women reporting more than 2 points on the EPDS question on suicidality or 4 or more points on the suicidality item in MADRS-S will be contacted by phone by a psychiatric nurse for a structured telephone suicide assessment. If needed, the women are referred to the appropriate level of care based on evaluation by the psychiatrist.

### 6.3 Visit 1 (Day-14 +- 7days before start of IMP) 'Psychiatrist, Informed Consent #2'

**Patients are now in gestational week 11-23.** Visit to perinatal psychiatrist at the specialist antenatal health clinic, Karolinska University Hospital Huddinge or at other study sites in Stockholm Healthcare Region. The psychiatrist will perform a clinical psychiatric assessment and evaluate the women with the Computerized Structured Clinical Interview for DSM-IV Axis I Disorders (SCID-I) and Clinical Global Impression Scale (CGI-S) to evaluate general symptom severity and MADRS. The women who fulfil criteria for moderate depression according to SCID-I and have no exclusion criteria will be asked to sign the informed consent #2 on the treatment with ICBT and the randomised controlled trial with treatment with sertraline or placebo.

The women who have failed to complete the web-screening are informed that this is at requirement for participation in the study. They will receive more guidance and hands-on-help in how to log in to [www.internetpsykiatri.se](http://www.internetpsykiatri.se) if necessary.

EudraCT No: 2013-004444-31

Date: 2014-5-11 rev 20160307, rev 20161121, rev 20180406

Status: FINAL

Version: 5.0, 5.1A, 5.2, 5.3

15(27)



1  
2  
3  
4  
5  
6  
7  
8  
9  
10  
11 Women uncertain about participation at the time of psychiatric assessment or women who have not yet  
12 completed necessary web-screening are offered to discuss with the study obstetrician when visiting the  
13 study centre one week later when they can provide informed consent (informed consent #2).  
14 All study participants will be documented in an inclusion log. Those not consenting to participate or not  
15 fulfilling criteria for moderate depression in the study are offered treatment as usual and will be  
16 documented in the screening log as screening failure.

17 Please note! Patients who are assessed having a high suicide risk will be excluded from further  
18 participation in the study and will be recorded as 'screening failure'. They will be referred to a psychiatric  
19 clinic for further evaluation and treatment according to clinical routines.

#### 20 21 **6.4 Phone contact (Day -4 days +- 2 before start of treatment) 'Nurse follow-up'**

22 **Patients are now in gestational week 12-25.** All patients who visited the psychiatrist and confirmed  
23 further participation in the study will be contacted by the study midwife. The reason for this call is to  
24 give the women the possibility to address questions about the study and to check whether they were  
25 able to obtain log-in for the internet-CBT platform (electronic identification and log in to the account at  
26 'My health care contacts'). Women not having been able to fill out the web-screening are informed that  
27 this is a required for participation in the study. If necessary, more guidance in how to log in to [www.  
28 internetpsykiatri.se](http://www.internetpsykiatri.se) is given.

29 Women who were uncertain about participation at the time of psychiatric assessment and who want  
30 further information for decision to participate in the study are scheduled for a visit to the study  
31 obstetrician. This visit is scheduled to the study centre one week later where they can provide informed  
32 consent (informed consent #2).

33 Women are scheduled for a visit to the antenatal clinic within the following week (research midwife).  
34 Patients are instructed to be fasting from midnight.

#### 35 36 **6.5 Visit 2 (Day 0 Start of treatment), 'Baseline, Randomisation & Treatment Start'**

37 **Patients are now in gestational week 13-26.** Visit at study site.

38 The investigator will review inclusion criteria, concomitant medication and fill in the 'Eligibility Form' in  
39 the CRF. If eligible with a completed web-screening, patients will be randomised according to standard  
40 procedures. This will be stated also in patients' medical record (randomisation number, storage of coded  
41 envelopes etc.). This means that only patients who are able to use the website [www.internetpsykiatri.se](http://www.internetpsykiatri.se)  
42 are eligible to participate in the study as specified in inclusion criteria 5. Patients that have not  
43 completed the internet questionnaire at this point might be given the opportunity to do so if the time  
44 permits and if it is possible to schedule a new meeting with the research midwife to continue Visit 2.

45 Any adverse events will be actively asked for and documented. The following blood samples will be  
46 collected: for endocrinological (TSH, prolactin), inflammatory (cytokines), and basic blood parameter  
47 analyses (Hb, MCV, MCHC), APTT as well as for epigenetic and telomere biology variables (leucocytes for  
48 telomere length, telomerase activity (RNA), DNA methylation), and DNA to study genetic differences in  
49 activities of drug metabolizing enzymes and drug transporters. The total volume of blood for the whole  
50 study period is 200ml. All blood samples except for haemoglobin and thyroid hormones will be frozen  
51 and analysed later. Haemoglobin and thyroid hormones will be analysed. Cell separation will be  
52 performed within 6 hours for the blood samples for epigenetic variables and telomere biology.  
53 If the haemoglobin or thyroid hormone concentrations are impaired the women will receive regular  
54 treatment according to standard procedures. Further, vital signs (height, weight, pulse and blood  
55 pressure) for 'baseline' evaluation will be measured. The patients are instructed to store the  
56 investigational medical product (IMP) as instructed and carefully follow the dosing scheme.

57 EudraCT No: 2013-004444-31

58 Date: 2014-5-11 rev 20160307, rev 20161121, rev 20180406

59 Status: FINAL

60 Version: 5.0, 5.1A, 5.2, 5.3

16(27)

1  
2  
3  
4  
5  
6  
7  
8  
9  
10  
11  
12 The patients will receive a 'subject diary' with contact details of involved staff and information regarding  
13 each of the following visit. There they will find written instructions on how to report and who to call if  
14 acute psychiatric services are required. This subject information also includes contact details on who to  
15 call if thoughts or feelings become overwhelming. The subject diary will be available as a document in  
16 the internet platform for the ICBT.

17 After the visit, the research midwife contacts the coordinator of the internet treatment to inform them  
18 that the patient is about to start treatment. The coordinator decides on a therapist that will contact the  
19 patient to present themselves, give some basic information about the internet treatment and answer  
20 question that concerns the internet treatment.

21 Please note! All subjects are informed that in any emergency situation, they should phone the Swedish  
22 Emergency Number 112 and/or visit the emergency department as in usual care. The code for the study  
23 drug can be broken at any time if necessary by the principal investigator or by any of the physicians to  
24 whom the principal investigator has delegated the responsibility.

25 Support and supervision regarding the ability to use the treatment platform for the ICBT is performed on  
26 site. Internet psychiatric treatment will be started at the same time as the pharmacological treatment  
27 and will continue for 12 weeks. The PRE-measurement in conjunction with start of ICBT treatment  
28 include: Women will be asked to complete the web-based self-assessment instruments in the pre-  
29 treatment assessment: MADRS-S, STAI-S, EQ5D, Life Events, PSQ, PAI, ISI, EPDS

30 During the internet treatment the women will self-assess their symptoms weekly with MADRS-S.  
31 At treatment day 24-34 (week 4) self-assessment with EQ5D, PAI, and ISI will be performed via internet,  
32 together with questions on how the patients perceive and use the internet treatment and the drug  
33 treatment, including adverse events (and their perceived relation to each treatment). A question if they  
34 believe they have received the active drug or the placebo will be administered to act as a blinding  
35 control. Also, two versions of the Treatment Credibility Questionnaire (TCQ), one each for the ICBT part  
36 and the pharmacological part of treatment respectively will be administered. These instruments will also  
37 be administered at week 2.

### 38 6.6 Visit 3 (week 4 +- 6 days) 'First Treatment Evaluation'

39 **Patients are now in gestational week 17-30.** Patients will have telephone contact or visit the site for  
40 consultation and for clinical assessment by the research nurse in psychiatry. At this visit also safety and  
41 effect assessments, CGI-S and MADRS will be carried out. If the extra internet-measures at treatment  
42 week 4 have not been filled in, the participant is encouraged to log in and do this at the site. The  
43 midwife/research nurse in psychiatry makes an 'Accountability log' on the IMP returned to site and  
44 controls for any perceived adverse events. If the patient according to diagnostic assessment with MADRS  
45 still fulfils criteria for moderate depression, the research nurse in psychiatry contacts the psychiatrist for  
46 increasing the dose of IMP or placebo. In these cases the patients have to collect a new container with  
47 an increased amount of tablets and return the previous one to the research midwife.

48 Blood sample collection to measure the following parameters will be collected: prolactin, full blood  
49 count, plasma sertraline serum concentration will be collected. Basic parameters (weight, pulse, blood  
50 pressure) and concomitant medication will be measured and documented.

51 EudraCT No: 2013-004444-31

52 Date: 2014-5-11 rev 20160307, rev 20161121, rev 20180406

53 Status: FINAL

54 Version: 5.0, 5.1A, 5.2, 5.3

55 17(27)

**Post-treatment self-assessment after ICBT (gestational week 27-38)**

The ICBT will be terminated after 12 weeks (in gestational week 27-38). Patients will fill in internet self-assessments (POST) at the end of the ICBT (see below, visit 4), where they also report adverse events.

**6.7 Visit 4 (week 14 +- 6 days) 'Second Treatment Evaluation'**

**Patients are now in gestational week 26-39.** Patients will have telephone contact or visit the site for consultation for clinical assessment by the research nurse in psychiatry, and also safety and effect assessments, CGI-S and MADRS will be completed. The midwife or the research nurse in psychiatry makes an 'Accountability log' and controls for experienced adverse events. If the post-treatment internet self-assessment has not already been completed, the women will be asked to use the internet platform to self-assess with MADRS-S, STAI-s, EQ-5D, ISI, adverse events, satisfaction with treatment (CSQ) including additional questions on how the patients perceive and use the internet treatment and the drug treatment, blinding control and PAI. At the end of the treatment, the ICBT-therapist will also make a short, structured rating of the participant's compliance to the ICBT manual. Blood sample collection for the following parameters: prolactin, HCG, inflammatory, sertraline plasma concentration, full blood count and epigenetic and telomere biology variable. Vital signs and concomitant medication will be documented.

If the woman according to psychiatric assessment with MADRS-S still fulfils criteria for moderate depression, the research nurse in psychiatry contacts the psychiatrist for increasing the dose of the IMP. In these cases the patients have to collect a new container with an increased amount of tablets and return the previous to the research midwife.

**6.8 Visit 5 (week 18 +- 6 days) 'At Delivery'**

NOTE: Part II of the study, Follow up of the infants born to study mothers, begins at the same time. (See paragraph 6.11.)

**Patients are now in gestational week 40 or in labour,** at delivery unit.

At the previous visit the research nurse has noted in the computerized medical record Obstetrix® that the following blood samples will be collected at the delivery:

From umbilical cord from the infant to measure: plasma concentration of sertraline, genetic variants for controlling activity of enzymes regulating the metabolism of sertraline, epigenetic and telomere biology variables in leucocytes.

From the woman: a placental biopsy to measure 11-beta hydroxyl steroid dehydrogenase type 2 and for epigenetic and telomere biology analyses in placenta.

In the maternity ward the following morning after delivery: full blood count, prolactin, plasma concentration of sertraline. The maternal blood loss during delivery and infant Apgar points are documented in CRF and in the medical record (Obstetrix®).

The midwife will schedule a visit to the antenatal clinic within a 4 weeks period including a visit to the psychiatrist.

The women are instructed to continue their dose of IMP as prescribed.

The women are informed that they will be observed in the hospital for at least 48 hours after delivery.

See paragraph 6.11 for the evaluation of the infants!

**6.9 Visit 6 (week +22 +- 6 days) 'Four weeks after Delivery'**

Visit at site. Patients will visit the site for clinical assessment by the psychiatrist, and for safety and effect assessments with CGI-S, EPDS and MADRS. The midwife makes an 'Accountability log' on drugs returned to site and controls for adverse events.

EudraCT No: 2013-004444-31

Date: 2014-5-11 rev 20160307, rev 20161121, rev 20180406

Status: FINAL

Version: 5.0, 5.1A, 5.2, 5.3

18(27)

1  
2  
3  
4  
5  
6  
7  
8  
9  
10  
11  
12  
13  
14  
15  
16  
17  
18  
19  
20  
21  
22  
23  
24  
25  
26  
27  
28  
29  
30  
31  
32  
33  
34  
35  
36  
37  
38  
39  
40  
41  
42  
43  
44  
45  
46  
47  
48  
49  
50  
51  
52  
53  
54  
55  
56  
57  
58  
59  
60

KTA-M032 2012-04

1  
2  
3  
4  
5  
6  
7  
8  
9  
10  
11 Self-assessment rating scales have already been filled out on the internet before the visit including  
12 EQ5D, MAMA, questions of breast feeding, MADRS-S, MPAS and ISI. Blood sample collection on the  
13 following: prolactin, inflammatory parameters, full blood count and a sample for measurement of  
14 sertraline plasma concentrations.

15 The blinded phase of the study is now terminated and the treatment is revealed for the women and the  
16 psychiatrist. Note that all study staff except for the psychiatrist and the psychiatry nurse will remain  
17 blinded through all forthcoming visits and analyses. Women on active treatment with sertraline will be  
18 recommended to continue treatment. Women treated with placebo and showing signs of clinical  
19 depression will be recommended treatment with sertraline according to clinical routine until one year  
20 after delivery.

21 Patients' self-assessment questionnaires should have been filled in via internet before the visit: MADRS-  
22 S, EPDS, EQ-5D, ISI, MAMA, MPAS adverse events and questions about breastfeeding. Blood sample  
23 collection for concentration of sertraline.

24 The midwife makes an 'Accountability log' on drugs returned to site and controls for adverse events.

#### 25 **6.10 Visit 7 (week + 30 +/- 2 weeks) '3 months after Delivery'**

26 Visit at site. Patients will visit the site for consultation for clinical assessment by the research nurse in  
27 Psychiatry including safety and effect assessments, CGI-S and SCID-I (only depression module) at the  
28 same time as visit 3 for the child (paragraph 6.13).

## 31 **PART II: THE CHILD BORN TO A MOTHER IN THE STUDY**

#### 32 **6.11 Visit 1 (+24 hours to 48h after delivery) Study paediatrician**

33 The women are informed that they will be observed in the hospital for at least 48 hours after the  
34 delivery.

35 Clinical and neurological examination by the study paediatrician according to the standardized protocol  
36 Hammersmith Neonatal Neurological Examination (HNNE) will be performed once within 48h of age.  
37 Buccal swabs are used for sampling of DNA for assessment of epigenetic, pharmacogenetic and telomere  
38 biology variables.

39 The following blood samples will be collected: Capillary plasma glucose levels on infant before the 2<sup>nd</sup>  
40 meal (5-10 µl).

41 Neonatal abstinence score (NAS) will be evaluated every 8 hours by the midwife/nurse at the maternity  
42 ward between 24 to 48 hours of age and longer if necessary.

#### 43 **6.12 Visit 2 (+ 48 hours after delivery) Study paediatrician**

44 The following blood samples will be collected: for plasma glucose (5-10 µl) and for measurement of  
45 plasma concentrations of sertraline (500µl). The blood sample will be collected at the same time as the  
46 routine neonatal screening.

47 EudraCT No: 2013-004444-31

48 Date: 2014-5-11 rev 20160307, rev 20161121, rev 20180406

49 Status: FINAL

50 Version: 5.0, 5.1A, 5.2, 5.3

51 19(27)

### 6.13 Visit 3 (child at three months of age) Study paediatrician and 'Nurse follow-up'= Visit 7 for the women

Clinical and neurological examination by study paediatrician with Hammersmith infant Neurological Examination (HINE). Data on body measurements are extracted from the Child Health Clinics electronic documentations. Buccal swabs are used to sample DNA for assessment of epigenetic and telomere biology variables.

Parental attachment, maternal health and questionnaires about psychiatric status of the partner and breast feeding is recorded in the questionnaires completed online, described under visit 7 in the maternal part of the study (paragraph 6.10).

### 6.14 Visit 4 (child at two years of age) to child psychologist and study paediatrician

A child psychologist will perform the evaluation with Bayley Scales of Infant and Toddler Development®, Third Edition (Bayley-III®). The study paediatrician will use HINE for evaluation. Buccal swabs are used for sampling of buccal tissues containing DNA for assessment of epigenetic and telomere biology variables will be taken. The women will complete the following questionnaires: MAMA, MPAS, Maternal psychosocial status, SDQ, MADRS-S. Furthermore growth charts from child health clinics will be collected from the electronic medical record system.

The visit at 2 years of age is the last visit in this part of the study. We are planning a follow up of the children at 5.5-6 years of age with evaluation by a child psychologist and questionnaires on development and behaviour. A detailed study protocol for this will be developed when this third part of the study will take place.

## 7 WITHDRAWAL OF SUBJECTS

### 7.1 Criteria for Withdrawal

Subjects are free to discontinue their participation in the study at any time and for whatever reason without explanations. If possible, the reason for withdrawal of consent should be documented. The subjects may be discontinued from study medication at any time at the discretion of the investigator(-s). The reason to discontinue subjects from study medication (other than exclusion criteria) could be:

- Subject is lost to follow up
- Severe protocol violation
- Severe adverse events (SAE) e.g. patients that according to psychiatric assessment have high suicidal risk, allergic reactions.
- Intercurrent illness violating the conditions of the study.

## 8 TREATMENT

### 8.1 Description of Investigational Medicinal Products (IMP)

The investigational medicinal product (IMP) is a capsule containing either sertraline hydrochloride or placebo manufactured by APL (Apoteket Produktion & Laboratorier AB, Stockholm, Sweden). The capsules of active drug are made of hard gelatine and filled with sertraline hydrochloride corresponding

EudraCT No: 2013-004444-31

Date: 2014-5-11 rev 20160307, rev 20161121, rev 20180406

Status: FINAL

Version: 5.0, 5.1A, 5.2, 5.3

20(27)

1  
2  
3  
4  
5  
6  
7  
8  
9  
10  
11  
12  
13  
14  
15  
16  
17  
18  
19  
20  
21  
22  
23  
24  
25  
26  
27  
28  
29  
30  
31  
32  
33  
34  
35  
36  
37  
38  
39  
40  
41  
42  
43  
44  
45  
46  
47  
48  
49  
50  
51  
52  
53  
54  
55  
56  
57  
58  
59  
60

KTA-M032 2012-04-

1  
2  
3  
4  
5  
6  
7  
8  
9  
10  
11 to 25mg sertraline using Zoloft® (25mg sertraline film-coated tablets, Pfizer Ltd, New York) and with a  
12 microcrystalline cellulose filler. The placebo capsules are made of identical microcrystalline cellulose  
13 filler embedded into an identical hard gelatine capsule. The IMP is delivered by the producer in sealed  
14 HD polyethylene containers, labelled according to a randomisation list. Patients are randomised to  
15 treatment by Karolinska Trial Alliance (KTA) with block randomisation. The size of these blocks is blinded  
16 for the investigators.

17 Treatment with sertraline/placebo starts with titration of 25 mg (1 tablet) daily for 5 days, and increases  
18 to 50 mg daily (2 tablets) until first treatment evaluation. After the first treatment evaluation the dose  
19 can be increased to 100 mg daily (4 tablets) with titration of 75mg for 5 days. After the second  
20 treatment evaluation the dose can be increased further to a maximum 150 mg/day (without titration).  
21 Any change of dose of IMP will only be performed after the psychiatrist's evaluation of the patient's  
22 safety and effect. Patients are not allowed to titrate the dose by themselves, not even after telephone  
23 consultation with the psychiatrist. The IMP can be administered either with or without food. If the  
24 patient notices signs of deterioration she is instructed to contact the research nurse by phone or in  
25 acute cases the psychiatric emergency department. The research nurse can then contact the psychiatrist  
26 for discussion, or in acute cases, she can directly contact the psychiatric emergency department. If  
27 necessary, the psychiatrist can call the patient and either refer her for acute psychiatric assessment or  
28 book the patient in for an extra visit.

## 28 **8.2 Treatment Assignment**

29 Patients will be randomly allocated to the next consecutive patient number when the investigator has  
30 verified that the patient fulfils the eligibility criteria.

## 31 **8.3 Blinding and Code Breaking**

32 This is a double-blind trial. Blinding will be accomplished by ensuring that the active substance and  
33 placebo are of identical appearance and packaging. The treatment code will be broken at one month  
34 after delivery or earlier for safety reasons judged by the investigator. Coded envelopes and code lists will  
35 be locked in a cupboard at the Pharmacy at Karolinska University Hospital, Huddinge. If a patient pre-  
36 terminates the study the date and the reason for withdrawal is documented in the CRF. The same  
37 procedure will take place at additional study sites. There is also an external Data Monitoring and Safety  
38 Committee (DMC) who can in due cases break the treatment code. The DMC will have senior expertise in  
39 clinical pharmacology (paediatric focus), neonatology/paediatrics, psychiatry and biostatistics.

# 40 **9 ALLOCATION TO TREATMENT**

41 The patients receive verbal and written instructions on how to use and store the IMP.

## 42 **9.1 Prior and Concomitant Medication**

43 Relevant medication history (prior medications) as judged by the Investigator will be documented in the  
44 CRF. At each visit the investigator (or his/hers designee) will ask for concomitant medication. During the  
45 study period concomitant use of the following drugs may be needed in either study group: Regular use  
46 of promethazine or propiomazine. Oxazepam in case of severe anxiety on rare occasions. These  
47 concomitant medications will be reported.

48 EudraCT No: 2013-004444-31

49 Date: 2014-5-11 rev 20160307, rev 20161121, rev 20180406

50 Status: FINAL

51 Version: 5.0, 5.1A, 5.2, 5.3

52 21(27)

1. ASA
2. NSAID
3. Oxazepam/Promethazine
4. Propiomazine

### 9.2 Compliance to Treatment & Product Accountability

All patients should administer the IMP as instructed. The research nurse will make accountability checks and document any discrepancies found. The monitor will also make an accountability check and document any compliance issues. At the end of the ICBT, the ICBT-therapist will also make a short, structured rating of the participant's compliance to the ICBT manual.

### 9.3 Continuation of Treatment

All patients should administer the IMP once daily from the randomisation visit until visit 6 (4 weeks after delivery). All patients in the active treatment arm will be offered continuation of the treatment as in routine care.

## 10 ASSESSMENT OF EFFICACY AND SAFETY

### 10.1 Clinical Safety Assessments

To evaluate the efficacy and safety of combined treatment with ICBT and sertraline vs. ICBT alone for antenatal moderate depression

#### Evaluation of efficacy:

- a) Effect size of the add-on effect of sertraline measured in difference in self-report of depressive symptoms (MADRS-S) at 1-12 weeks, at 14 weeks, and at 22 weeks (4 weeks postpartum) of treatment. All self-reported assessment are performed online.
- b) Add-on treatment effect of sertraline measured in rate of remission from depression (measured by diagnostic psychiatric interview MADRS at 4 weeks, 14 weeks and 22 weeks (4 weeks postpartum) of treatment.
- c) Effect size of treatment effect of ICBT calculated as difference of self-report of symptom (MADRS-S) pre- and post-treatment.
- d) Risk of suicidality measured as change from baseline (measured by MADRS-S and MADRS) and as occurrence of exclusion during the study due to psychiatric assessment of high suicidal risk

#### Evaluation of safety:

The psychologist and the psychiatrist work in collaboration to ensure that patients are ensured optimal psychiatric care and safety. The psychologist supervises and monitors each patient individually on a weekly basis online, for an early detection of symptoms that indicate 'disease progress' /'disease improvement' and any symptoms that require further expertise and support by a psychiatrist. The psychiatrist has the main responsibility to clinically decide about inclusion of patients and to monitor the efficacy and safety of treatment with help of psychiatric nurse. The psychiatrist recommends the PI if a patient needs to withdraw from the study due to increased level of depression or other psychiatric illness.

EudraCT No: 2013-004444-31

Date: 2014-5-11 rev 20160307, rev 20161121, rev 20180406

Status: FINAL

Version: 5.0, 5.1A, 5.2, 5.3

22(27)



1  
2  
3  
4  
5  
6  
7  
8  
9  
10  
11 All visits to the study psychiatrist and interaction with the Unit for Internet Psychiatry are documented in  
12 health care journals according to routine and practice in the psychiatry unit at Stockholm Healthcare  
13 Region.

## 14 10.2 Laboratory Safety Assessments

15 Blood analyses for control of thyroid function (TSH, T3 and T4) and Haemoglobin (Hb) will be evaluated  
16 as done in clinical practice and in case of values above or below reference values in pregnant women the  
17 patients will be contacted and necessary action will be undertaken.

18 Other blood tests, e.g. samples for plasma concentrations of sertraline, other endocrinological tests  
19 (apart from thyroid hormones) and DNA from whole blood for analyses of genetic variants controlling  
20 metabolism and drug transport will be banked and analysed when all study samples are collected. Cell  
21 separation will be performed within 6 hours for epigenetic and telomere biology variables testing. All  
22 blood samples from the infants in the umbilical cord will be analysed later, cell separation will be done  
23 within 6 hours. The capillary blood glucose will be measured immediately and if below reference values  
24 measurements will be taken to restore normal levels.

## 25 11 PROCEEDINGS FOR ADVERSE EVENTS

### 26 11.1 Definition of Adverse Events

27 The drug sertraline used in this study is one of the drugs of choice according to the treatment  
28 recommendations from the Drug and Therapeutics Committee at Stockholm County Board  
29 (Läkemedelskommittén, SLL Kloka Listan: [www.janusinfo.se/Beslutsstod/Kloka-Listan/Kloka-listan-2014](http://www.janusinfo.se/Beslutsstod/Kloka-Listan/Kloka-listan-2014))  
30 so the adverse effects and adverse reactions are known to the study psychiatrists.

31 In the study, the definitions of adverse events (AE) serious adverse events (SAE) and suspected  
32 unexpected Serious Adverse Reactions (SUSAR) relate to any study patient regardless of if this patient  
33 belongs to the group receiving sertraline and I-CBT or placebo and I-CBT. The adverse events can also be  
34 related to the I-CBT.

35 An adverse event (AE) is defined as an event that is any undesirable experience associated with the use  
36 of the medical product in this case sertraline or placebo.

37 A serious adverse event (SAE) is defined as death, a life-threatening event, hospitalization (initial or  
38 prolonged), disability, permanent damage or congenital anomaly/birth defect in the infant. **Any  
39 suspected SAE should be reported in a special form and sent within 24 hours by e-mail to the sponsor.**

40 **A Suspected Unexpected Serious Adverse Reaction (SUSAR)** is defined as an untoward and unintended  
41 response to a study drug, which is not listed in the applicable SPC, and meets one of the following  
42 serious criteria: results in death, is life-threatening, requires hospitalisation or prolongation of an  
43 existing hospitalisation, results in persistent or significant disability or incapacity, or is a congenital  
44 anomaly or birth defect.

45 Adverse events (AE) or serious adverse events (SAE) are any undesirable experience reported by the  
46 patient, reported in interviews, questionnaires, or results from laboratory tests that come to the  
47 knowledge of the investigator, regardless of the relation to the drug/placebo used for treatment in the  
48 study. The sponsor will report all SUSARs to all Principal Investigators involved in trials with the IMP.

49 EudraCT No: 2013-004444-31

50 Date: 2014-5-11 rev 20160307, rev 20161121, rev 20180406

51 Status: FINAL

52 Version: 5.0, 5.1A, 5.2, 5.3

53 23(27)

1  
2  
3  
4  
5  
6  
7  
8  
9  
10  
11  
12 There is an additional data monitoring and safety committee (DMC) consisting of independent senior  
13 researchers from Karolinska Institutet, Umeå University and Lund University (See section 8.3). This  
14 committee can at any time if there is any suspicion of a serious adverse event break the code and  
undertake necessary precautions.

15 It is well documented that the ICBT may cause stress as the participants sometimes feel they do not have  
16 time to fulfil the ICBT. Unexpected reactions on ICBT will also be reported according to procedures used  
17 routinely in the Department for Internet Psychiatry (IPSY) at Psychiatry Southwest, Stockholm  
18 Healthcare Region. These reports of adverse events will be reported further to the study physician, who  
19 will report to the sponsor and in due cases report to Karolinska Trial Alliance (KTA) for further reports to  
EduraVigilance.

20  
21 The sponsor will each year of the study submit a safety report to The Swedish Medical Products Agency.

## 22 23 24 **12 DATA MANAGEMENT**

25  
26 All data will be collected in a database. Each subject in the study will have a study number to identify the  
27 subject. The code will be kept on paper in a locked cupboard.

### 28 29 **12.1 Statistical Analysis**

30 The main analyses will be done according to the intention to treat principle. Data will also be analysed  
31 per protocol to achieve an efficacy analysis. The primary endpoint, results of BSID III<sup>®</sup> will be analysed  
32 with Student's T-test. Multiple imputation will be used for missing data. The variables used in the  
33 imputation mode will be smoking, ADHD, education level and parity. All patients' demographic data will  
34 be analysed by descriptive (mean, median and range) statistics. Fisher's exact test will be used for  
35 dichotomous variables such as infant sex, mother's smoking and optimal/suboptimal neurology at  
Hammersmith neonatal neurological examination. Throughout the analysis, the mean and standard  
36 deviation will be calculated for all continuous data using Student's T-test. The non-normally distributed  
37 continuous variables, including the results from Hammersmith neurological scales will be analysed with  
38 the Mann-Whitney U-test and the results of MADRS by Cohen's effect size. For categorical variables,  
39 absolute frequency, percentages and/or proportions are calculated and Fishers exact test will be used.

40 The treatment effect analysis of the add-on effect of sertraline to ICBT will be a multilevel model for  
41 longitudinal data with timepoints nested within individuals (a.k.a. Growth Curve Modelling) using  
42 MADRS-S scores from baseline, each of the 12 weeks in treatment, and post treatment. A p-value of  
43 <0.05 will be considered significant. Sub group analyses will be performed for several subgroups such as  
44 prematurity, smokers, ADHD, parity, maternal age and education level. Spearman's correlation test will  
45 be used to test the correlation between maternal and infant plasma sertraline concentration.

### 46 47 **12.2 Determination of Sample Size**

#### 48 **For the primary objective**

49 The sample size is calculated to be able to detect a difference of 7 points (SD 0.5) points with a power of  
50 80% ( $\alpha$ : 0, 05) in the results when testing with BSID-III<sup>®</sup> at 2 years of age. It is estimated to give a clinical  
significant difference. This means that the study will require a sample of 73 participating children in each

51 EudraCT No: 2013-004444-31

52 Date: 2014-5-11 rev 20160307, rev 20161121, rev 20180406

53 Status: FINAL

54 Version: 5.0, 5.1A, 5.2, 5.3

24(27)

group. We assume a superiority effect when exposed to sertraline in utero (effect on BSID). If no difference between groups is detected various non-inferiority analyses will be pursued.

#### For the secondary objective

The additional effect of sertraline as compared to standard ICBT plus placebo will be evaluated by comparing effects on MADRS-S scores between the groups. Data on the total effect of CBT combined with antidepressant therapy is limited. The standardized effect of psychotherapy can be as high as 0.74 when compared to placebo and 0.38 when compared to face-to-face psychotherapy (35). ICBT is largely self-directed even with therapist guidance, which is likely to put a higher demand on the patients in terms of initiative and maintaining the motivation compared to face-to-face-treatment. Therefore, it is likely that the added effect of SSRI will be larger than what has been found in face-to-face CBT, though not as large as when compared to placebo alone. We therefore hypothesize a standardized effect size of  $d=0.50$  (Cohen). This is also the minimal added effect that we would consider clinically relevant considering the possibility of negative side effects and the documented efficacy of ICBT alone.(34) A sample size calculation with standardized effect equal to 0.5 (Cohen),  $\alpha$ -value=0.05 and power 80% requires 64 persons in each group. Therefore to recruit 100 patients in each group will fulfil the power calculation.

#### 12.3 Analysis of risk –benefit

The main outcome of this study is to evaluate the cognitive development in the children exposed to sertraline in fetal life. Usually these studies are performed on cohorts. In the present study we have the opportunity to compare the outcome in two groups of children, whose mothers have received the same treatment except for the treatment with the active drug (sertraline). For the second endpoint, the level of maternal depression, there is a possibility to evaluate the effect of the add-on treatment with sertraline to the ICBT. Sertraline is recommended for treatment of moderate depression, and is used in clinical practices. The risk for the women or their children is not increased compared to the regular treatment today. On the contrary, the women will have a more thorough follow-up of their treatment than in clinical practice.

#### 12.4 Control of quality and guarantee of quality

There will an independent monitor from Karolinska Trial Alliance (KTA), Karolinska University Hospital, who will continuously control that the researchers follow the study protocol. The staff at KTA has well documented knowledge and formal education in Good Clinical Practice GCP.

#### 12.5 Insurance of patients

All patients included in the study are included in The Patient Claims Panel Insurance for patients in Sweden. ([www.patientskadenamnden.se/system/in-english/](http://www.patientskadenamnden.se/system/in-english/)).

EudraCT No: 2013-004444-31

Date: 2014-5-11 rev 20160307, rev 20161121, rev 20180406

Status: FINAL

Version: 5.0, 5.1A, 5.2, 5.3

25(27)

## REFERENCES

1. Josefsson, A., et al., *Prevalence of depressive symptoms in late pregnancy and postpartum*. Acta Obstet Gynecol Scand, 2001. **80**(3): p. 251-5.
2. Stewart, D.E., *Clinical practice. Depression during pregnancy*. N Engl J Med, 2011. **365**(17): p. 1605-11.
3. Gavin, N.I., et al., *Perinatal depression: a systematic review of prevalence and incidence*. Obstet Gynecol, 2005. **106**(5 Pt 1): p. 1071-83.
4. Milgrom, J., et al., *Antenatal risk factors for postnatal depression: a large prospective study*. J Affect Disord, 2008. **108**(1-2): p. 147-57.
5. NICE. *Antenatal and postnatal mental health: the NICE guideline on clinical management and service guidance*. London: National Institute for Health and Clinical Excellence. (<https://www.nice.org.uk/guidance/cg192>). 2014 [cited 2018 06/06].
6. Socialstyrelsen. *Nationella riktlinjer för vård vid depression och ångestsyndrom: stöd för styrning och ledning (In Swedish, national guidelines for care of depression and anxiety syndromes)*. (<http://www.socialstyrelsen.se/nationellariktlinjerfordepressionochangestsyndrom>). 2017 [cited 2018 06/06].
7. Grote, N.K., et al., *A meta-analysis of depression during pregnancy and the risk of preterm birth, low birth weight, and intrauterine growth restriction*. Arch Gen Psychiatry, 2010. **67**(10): p. 1012-24.
8. Forsell, E., et al., *Internet delivered cognitive behavior therapy for antenatal depression: A randomised controlled trial*. J Affect Disord, 2017. **221**: p. 56-64.
9. Cuijpers, P., et al., *Psychotherapy for depression in adults: a meta-analysis of comparative outcome studies*. J Consult Clin Psychol, 2008. **76**(6): p. 909-22.
10. Andrews, G., et al., *Computer therapy for the anxiety and depressive disorders is effective, acceptable and practical health care: a meta-analysis*. PLoS One, 2010. **5**(10): p. e13196.
11. Cuijpers, P., et al., *Is guided self-help as effective as face-to-face psychotherapy for depression and anxiety disorders? A systematic review and meta-analysis of comparative outcome studies*. Psychol Med, 2010. **40**(12): p. 1943-57.
12. Hedman, E., et al., *Effectiveness of Internet-based cognitive behaviour therapy for depression in routine psychiatric care*. J Affect Disord, 2014. **155**: p. 49-58.
13. Andersson, G., et al., *Development of a New Approach to Guided Self-Help via the Internet: The Swedish Experience*. Journal of Technology in Human Services, 2008. **26**(2-4): p. 161-181.
14. Bonnin, A. and P. Levitt, *Fetal, maternal, and placental sources of serotonin and new implications for developmental programming of the brain*. Neuroscience, 2011. **197**: p. 1-7.
15. Oberlander, T.F., J.A. Gingrich, and M.S. Ansorge, *Sustained neurobehavioral effects of exposure to SSRI antidepressants during development: molecular to clinical evidence*. Clin Pharmacol Ther, 2009. **86**(6): p. 672-7.
16. Casper, R.C., et al., *Length of prenatal exposure to selective serotonin reuptake inhibitor (SSRI) antidepressants: effects on neonatal adaptation and psychomotor development*. Psychopharmacology (Berl), 2011. **217**(2): p. 211-9.
17. Field, T., M. Diego, and M. Hernandez-Reif, *Prenatal depression effects on the fetus and newborn: a review*. Infant Behav Dev, 2006. **29**(3): p. 445-55.
18. Moses-Kolko, E.L., et al., *Neonatal signs after late in utero exposure to serotonin reuptake inhibitors: literature review and implications for clinical applications*. JAMA, 2005. **293**(19): p. 2372-83.
19. Reis, M. and B. Kallen, *Delivery outcome after maternal use of antidepressant drugs in pregnancy: an update using Swedish data*. Psychol Med, 2010. **40**(10): p. 1723-33.

EudraCT No: 2013-004444-31

Date: 2014-5-11 rev 20160307, rev 20161121, rev 20180406

Status: FINAL

Version: 5.0, 5.1A, 5.2, 5.3

26(27)

- 1  
2  
3  
4  
5  
6  
7  
8  
9  
10  
11 20. Warburton, W., C. Hertzman, and T.F. Oberlander, *A register study of the impact of stopping third trimester selective serotonin reuptake inhibitor exposure on neonatal health*. *Acta Psychiatr Scand*, 2010. **121**(6): p. 471-9.
- 12  
13 21. DeVane, C.L., H.L. Liston, and J.S. Markowitz, *Clinical pharmacokinetics of sertraline*. *Clin Pharmacokinet*, 2002. **41**(15): p. 1247-66.
- 14  
15 22. Shalev, I., et al., *Stress and telomere biology: a lifespan perspective*. *Psychoneuroendocrinology*, 2013. **38**(9): p. 1835-42.
- 16  
17 23. Entringer, S., et al., *Maternal psychosocial stress during pregnancy is associated with newborn leukocyte telomere length*. *Am J Obstet Gynecol*, 2013. **208**(2): p. 134 e1-7.
- 18  
19 24. Price, L.H., et al., *Telomeres and early-life stress: an overview*. *Biol Psychiatry*, 2013. **73**(1): p. 15-23.
- 20  
21 25. Menke, A., T. Klengel, and E.B. Binder, *Epigenetics, depression and antidepressant treatment*. *Curr Pharm Des*, 2012. **18**(36): p. 5879-89.
- 22  
23 26. Gentile, S. and M. Galbally, *Prenatal exposure to antidepressant medications and neurodevelopmental outcomes: a systematic review*. *J Affect Disord*, 2011. **128**(1-2): p. 1-9.
- 24  
25 27. Hanley, G.E., U. Brain, and T.F. Oberlander, *Infant developmental outcomes following prenatal exposure to antidepressants, and maternal depressed mood and positive affect*. *Early Hum Dev*, 2013. **89**(8): p. 519-24.
- 26  
27 28. Klinger, G., et al., *Long-term outcome following selective serotonin reuptake inhibitor induced neonatal abstinence syndrome*. *J Perinatol*, 2011. **31**(9): p. 615-20.
- 28  
29 29. Nulman, I., et al., *Neurodevelopment of children exposed in utero to antidepressant drugs*. *N Engl J Med*, 1997. **336**(4): p. 258-62.
- 30  
31 30. Pawluski, J.L., *Perinatal selective serotonin reuptake inhibitor exposure: impact on brain development and neural plasticity*. *Neuroendocrinology*, 2012. **95**(1): p. 39-46.
- 32  
33 31. Rai, D., et al., *Parental depression, maternal antidepressant use during pregnancy, and risk of autism spectrum disorders: population based case-control study*. *BMJ*, 2013. **346**: p. f2059.
- 34  
35 32. Rubertsson, C., et al., *The Swedish validation of Edinburgh Postnatal Depression Scale (EPDS) during pregnancy*. *Nord J Psychiatry*, 2011. **65**(6): p. 414-8.
- 36  
37  
38  
39  
40  
41  
42  
43  
44  
45  
46  
47  
48  
49  
50  
51  
52  
53  
54  
55  
56  
57  
58  
59  
60

EudraCT No: 2013-004444-31

Date: 2014-5-11 rev 20160307, rev 20161121, rev 20180406

Status: FINAL

Version: 5.0, 5.1A, 5.2, 5.3

27(27)

# Reporting checklist for protocol of a clinical trial.

Based on the SPIRIT guidelines.

## Instructions to authors

Complete this checklist by entering the page numbers from your manuscript where readers will find each of the items listed below.

If your work does not currently contain an item consider adding it. If you are certain that an item does not apply to your work, write 'n/a'. If you like, you can provide a short reason.

Upload this checklist as an extra file when you submit to a journal.

In your methods section, say that you used the SPIRIT reporting guidelines, and cite them as:

Chan A-W, Tetzlaff JM, Altman DG, Laupacis A, Gøtzsche PC, Krleža-Jerić K, Hróbjartsson A, Mann H, Dickersin K, Berlin J, Doré C, Parulekar W, Summerskill W, Groves T, Schulz K, Sox H, Rockhold FW, Rennie D, Moher D. SPIRIT 2013 Statement: Defining standard protocol items for clinical trials. *Ann Intern Med.* 2013;158(3):200-207

|                                             |                     | Reporting Item                                                                                               | Page Number |
|---------------------------------------------|---------------------|--------------------------------------------------------------------------------------------------------------|-------------|
| Title                                       | <a href="#">#1</a>  | Descriptive title identifying the study design, population, interventions, and, if applicable, trial acronym | 1, 3        |
| Trial registration                          | <a href="#">#2a</a> | Trial identifier and registry name. If not yet registered, name of intended registry                         | 14          |
| Trial registration: data set                | <a href="#">#2b</a> | All items from the World Health Organization Trial Registration Data Set                                     | 14          |
| Protocol version                            | <a href="#">#3</a>  | Date and version identifier                                                                                  | 14          |
| Funding                                     | <a href="#">#4</a>  | Sources and types of financial, material, and other support                                                  | 13          |
| Roles and responsibilities: contributorship | <a href="#">#5a</a> | Names, affiliations, and roles of protocol contributors                                                      | 13          |
| Roles and responsibilities:                 | <a href="#">#5b</a> | Name and contact information for the trial sponsor                                                           | 1           |



|    |                      |                      |                                                          |        |
|----|----------------------|----------------------|----------------------------------------------------------|--------|
| 1  | sponsor contact      |                      |                                                          |        |
| 2  | information          |                      |                                                          |        |
| 3  |                      |                      |                                                          |        |
| 4  | Roles and            | <a href="#">#5c</a>  | Role of study sponsor and funders, if any, in study      | 13     |
| 5  | responsibilities:    |                      | design; collection, management, analysis, and            |        |
| 6  | sponsor and funder   |                      | interpretation of data; writing of the report; and the   |        |
| 7  |                      |                      | decision to submit the report for publication,           |        |
| 8  |                      |                      | including whether they will have ultimate authority      |        |
| 9  |                      |                      | over any of these activities                             |        |
| 10 |                      |                      |                                                          |        |
| 11 |                      |                      |                                                          |        |
| 12 |                      |                      |                                                          |        |
| 13 |                      |                      |                                                          |        |
| 14 | Roles and            | <a href="#">#5d</a>  | Composition, roles, and responsibilities of the          | 11, 13 |
| 15 | responsibilities:    |                      | coordinating centre, steering committee, endpoint        |        |
| 16 | committees           |                      | adjudication committee, data management team,            |        |
| 17 |                      |                      | and other individuals or groups overseeing the trial,    |        |
| 18 |                      |                      | if applicable (see Item 21a for data monitoring          |        |
| 19 |                      |                      | committee)                                               |        |
| 20 |                      |                      |                                                          |        |
| 21 |                      |                      |                                                          |        |
| 22 |                      |                      |                                                          |        |
| 23 | Background and       | <a href="#">#6a</a>  | Description of research question and justification       | 3      |
| 24 | rationale            |                      | for undertaking the trial, including summary of          |        |
| 25 |                      |                      | relevant studies (published and unpublished)             |        |
| 26 |                      |                      | examining benefits and harms for each intervention       |        |
| 27 |                      |                      |                                                          |        |
| 28 |                      |                      |                                                          |        |
| 29 |                      |                      |                                                          |        |
| 30 | Background and       | <a href="#">#6b</a>  | Explanation for choice of comparators                    | 3      |
| 31 | rationale: choice of |                      |                                                          |        |
| 32 | comparators          |                      |                                                          |        |
| 33 |                      |                      |                                                          |        |
| 34 |                      |                      |                                                          |        |
| 35 | Objectives           | <a href="#">#7</a>   | Specific objectives or hypotheses                        | 4      |
| 36 |                      |                      |                                                          |        |
| 37 |                      |                      |                                                          |        |
| 38 | Trial design         | <a href="#">#8</a>   | Description of trial design including type of trial (eg, | 5      |
| 39 |                      |                      | parallel group, crossover, factorial, single group),     |        |
| 40 |                      |                      | allocation ratio, and framework (eg, superiority,        |        |
| 41 |                      |                      | equivalence, non-inferiority, exploratory)               |        |
| 42 |                      |                      |                                                          |        |
| 43 |                      |                      |                                                          |        |
| 44 |                      |                      |                                                          |        |
| 45 | Study setting        | <a href="#">#9</a>   | Description of study settings (eg, community clinic,     | 5      |
| 46 |                      |                      | academic hospital) and list of countries where data      |        |
| 47 |                      |                      | will be collected. Reference to where list of study      |        |
| 48 |                      |                      | sites can be obtained                                    |        |
| 49 |                      |                      |                                                          |        |
| 50 |                      |                      |                                                          |        |
| 51 | Eligibility criteria | <a href="#">#10</a>  | Inclusion and exclusion criteria for participants. If    | 6      |
| 52 |                      |                      | applicable, eligibility criteria for study centres and   |        |
| 53 |                      |                      | individuals who will perform the interventions (eg,      |        |
| 54 |                      |                      | surgeons, psychotherapists)                              |        |
| 55 |                      |                      |                                                          |        |
| 56 |                      |                      |                                                          |        |
| 57 |                      |                      |                                                          |        |
| 58 | Interventions:       | <a href="#">#11a</a> | Interventions for each group with sufficient detail to   | 7      |
| 59 |                      |                      |                                                          |        |
| 60 |                      |                      |                                                          |        |

|    |                      |                      |                                                       |          |
|----|----------------------|----------------------|-------------------------------------------------------|----------|
| 1  | description          |                      | allow replication, including how and when they will   |          |
| 2  |                      |                      | be administered                                       |          |
| 3  |                      |                      |                                                       |          |
| 4  | Interventions:       | <a href="#">#11b</a> | Criteria for discontinuing or modifying allocated     | 7        |
| 5  | modifications        |                      | interventions for a given trial participant (eg, drug |          |
| 6  |                      |                      | dose change in response to harms, participant         |          |
| 7  |                      |                      | request, or improving / worsening disease)            |          |
| 8  |                      |                      |                                                       |          |
| 9  |                      |                      |                                                       |          |
| 10 | Interventions:       | <a href="#">#11c</a> | Strategies to improve adherence to intervention       | 7        |
| 11 | adherence            |                      | protocols, and any procedures for monitoring          |          |
| 12 |                      |                      | adherence (eg, drug tablet return; laboratory tests)  |          |
| 13 |                      |                      |                                                       |          |
| 14 |                      |                      |                                                       |          |
| 15 |                      |                      |                                                       |          |
| 16 | Interventions:       | <a href="#">#11d</a> | Relevant concomitant care and interventions that      | 6        |
| 17 | concomitant care     |                      | are permitted or prohibited during the trial          |          |
| 18 |                      |                      |                                                       |          |
| 19 |                      |                      |                                                       |          |
| 20 | Outcomes             | <a href="#">#12</a>  | Primary, secondary, and other outcomes, including     | 8        |
| 21 |                      |                      | the specific measurement variable (eg, systolic       |          |
| 22 |                      |                      | blood pressure), analysis metric (eg, change from     |          |
| 23 |                      |                      | baseline, final value, time to event), method of      |          |
| 24 |                      |                      | aggregation (eg, median, proportion), and time        |          |
| 25 |                      |                      | point for each outcome. Explanation of the clinical   |          |
| 26 |                      |                      | relevance of chosen efficacy and harm outcomes is     |          |
| 27 |                      |                      | strongly recommended                                  |          |
| 28 |                      |                      |                                                       |          |
| 29 |                      |                      |                                                       |          |
| 30 |                      |                      |                                                       |          |
| 31 |                      |                      |                                                       |          |
| 32 |                      |                      |                                                       |          |
| 33 | Participant timeline | <a href="#">#13</a>  | Time schedule of enrolment, interventions             | 5 (fig1) |
| 34 |                      |                      | (including any run-ins and washouts),                 |          |
| 35 |                      |                      | assessments, and visits for participants. A           |          |
| 36 |                      |                      | schematic diagram is highly recommended (see          |          |
| 37 |                      |                      | Figure)                                               |          |
| 38 |                      |                      |                                                       |          |
| 39 |                      |                      |                                                       |          |
| 40 |                      |                      |                                                       |          |
| 41 | Sample size          | <a href="#">#14</a>  | Estimated number of participants needed to            | 7        |
| 42 |                      |                      | achieve study objectives and how it was               |          |
| 43 |                      |                      | determined, including clinical and statistical        |          |
| 44 |                      |                      | assumptions supporting any sample size                |          |
| 45 |                      |                      | calculations                                          |          |
| 46 |                      |                      |                                                       |          |
| 47 |                      |                      |                                                       |          |
| 48 |                      |                      |                                                       |          |
| 49 | Recruitment          | <a href="#">#15</a>  | Strategies for achieving adequate participant         | 5        |
| 50 |                      |                      | enrolment to reach target sample size                 |          |
| 51 |                      |                      |                                                       |          |
| 52 |                      |                      |                                                       |          |
| 53 | Allocation:          | <a href="#">#16a</a> | Method of generating the allocation sequence (eg,     | 6        |
| 54 | sequence             |                      | computer-generated random numbers), and list of       |          |
| 55 | generation           |                      | any factors for stratification. To reduce             |          |
| 56 |                      |                      | predictability of a random sequence, details of any   |          |
| 57 |                      |                      |                                                       |          |
| 58 |                      |                      |                                                       |          |
| 59 |                      |                      |                                                       |          |
| 60 |                      |                      |                                                       |          |

planned restriction (eg, blocking) should be provided in a separate document that is unavailable to those who enrol participants or assign interventions

|    |                      |                      |                                                        |
|----|----------------------|----------------------|--------------------------------------------------------|
| 1  |                      |                      |                                                        |
| 2  |                      |                      |                                                        |
| 3  |                      |                      |                                                        |
| 4  |                      |                      |                                                        |
| 5  |                      |                      |                                                        |
| 6  |                      |                      |                                                        |
| 7  | Allocation           | <a href="#">#16b</a> | Mechanism of implementing the allocation               |
| 8  | concealment          |                      | sequence (eg, central telephone; sequentially          |
| 9  | mechanism            |                      | numbered, opaque, sealed envelopes), describing        |
| 10 |                      |                      | any steps to conceal the sequence until                |
| 11 |                      |                      | interventions are assigned                             |
| 12 |                      |                      |                                                        |
| 13 |                      |                      |                                                        |
| 14 |                      |                      |                                                        |
| 15 | Allocation:          | <a href="#">#16c</a> | Who will generate the allocation sequence, who         |
| 16 | implementation       |                      | will enrol participants, and who will assign           |
| 17 |                      |                      | participants to interventions                          |
| 18 |                      |                      |                                                        |
| 19 |                      |                      |                                                        |
| 20 | Blinding (masking)   | <a href="#">#17a</a> | Who will be blinded after assignment to                |
| 21 |                      |                      | interventions (eg, trial participants, care providers, |
| 22 |                      |                      | outcome assessors, data analysts), and how             |
| 23 |                      |                      |                                                        |
| 24 |                      |                      |                                                        |
| 25 |                      |                      |                                                        |
| 26 | Blinding (masking):  | <a href="#">#17b</a> | If blinded, circumstances under which unblinding is    |
| 27 | emergency            |                      | permissible, and procedure for revealing a             |
| 28 | unblinding           |                      | participant's allocated intervention during the trial  |
| 29 |                      |                      |                                                        |
| 30 |                      |                      |                                                        |
| 31 | Data collection plan | <a href="#">#18a</a> | Plans for assessment and collection of outcome,        |
| 32 |                      |                      | baseline, and other trial data, including any related  |
| 33 |                      |                      | processes to promote data quality (eg, duplicate       |
| 34 |                      |                      | measurements, training of assessors) and a             |
| 35 |                      |                      | description of study instruments (eg,                  |
| 36 |                      |                      | questionnaires, laboratory tests) along with their     |
| 37 |                      |                      | reliability and validity, if known. Reference to where |
| 38 |                      |                      | data collection forms can be found, if not in the      |
| 39 |                      |                      | protocol                                               |
| 40 |                      |                      |                                                        |
| 41 |                      |                      |                                                        |
| 42 |                      |                      |                                                        |
| 43 |                      |                      |                                                        |
| 44 |                      |                      |                                                        |
| 45 | Data collection      | <a href="#">#18b</a> | Plans to promote participant retention and             |
| 46 | plan: retention      |                      | complete follow-up, including list of any outcome      |
| 47 |                      |                      | data to be collected for participants who              |
| 48 |                      |                      | discontinue or deviate from intervention protocols     |
| 49 |                      |                      |                                                        |
| 50 |                      |                      |                                                        |
| 51 |                      |                      |                                                        |
| 52 | Data management      | <a href="#">#19</a>  | Plans for data entry, coding, security, and storage,   |
| 53 |                      |                      | including any related processes to promote data        |
| 54 |                      |                      | quality (eg, double data entry; range checks for       |
| 55 |                      |                      | data values). Reference to where details of data       |
| 56 |                      |                      | management procedures can be found, if not in the      |
| 57 |                      |                      |                                                        |
| 58 |                      |                      |                                                        |
| 59 |                      |                      |                                                        |
| 60 |                      |                      |                                                        |

|    |                        |                                                                             |      |
|----|------------------------|-----------------------------------------------------------------------------|------|
|    |                        | protocol                                                                    |      |
| 1  |                        |                                                                             |      |
| 2  | Statistics: outcomes   | <a href="#">#20a</a> Statistical methods for analysing primary and          | 9-10 |
| 3  |                        | secondary outcomes. Reference to where other                                |      |
| 4  |                        | details of the statistical analysis plan can be found,                      |      |
| 5  |                        | if not in the protocol                                                      |      |
| 6  |                        |                                                                             |      |
| 7  |                        |                                                                             |      |
| 8  |                        |                                                                             |      |
| 9  | Statistics: additional | <a href="#">#20b</a> Methods for any additional analyses (eg, subgroup      | 9-10 |
| 10 | analyses               | and adjusted analyses)                                                      |      |
| 11 |                        |                                                                             |      |
| 12 |                        |                                                                             |      |
| 13 | Statistics: analysis   | <a href="#">#20c</a> Definition of analysis population relating to protocol | 9-10 |
| 14 | population and         | non-adherence (eg, as randomised analysis), and                             |      |
| 15 | missing data           | any statistical methods to handle missing data (eg,                         |      |
| 16 |                        | multiple imputation)                                                        |      |
| 17 |                        |                                                                             |      |
| 18 |                        |                                                                             |      |
| 19 |                        |                                                                             |      |
| 20 | Data monitoring:       | <a href="#">#21a</a> Composition of data monitoring committee (DMC);        | 11   |
| 21 | formal committee       | summary of its role and reporting structure;                                |      |
| 22 |                        | statement of whether it is independent from the                             |      |
| 23 |                        | sponsor and competing interests; and reference to                           |      |
| 24 |                        | where further details about its charter can be                              |      |
| 25 |                        | found, if not in the protocol. Alternatively, an                            |      |
| 26 |                        | explanation of why a DMC is not needed                                      |      |
| 27 |                        |                                                                             |      |
| 28 |                        |                                                                             |      |
| 29 |                        |                                                                             |      |
| 30 |                        |                                                                             |      |
| 31 | Data monitoring:       | <a href="#">#21b</a> Description of any interim analyses and stopping       | 11   |
| 32 | interim analysis       | guidelines, including who will have access to these                         |      |
| 33 |                        | interim results and make the final decision to                              |      |
| 34 |                        | terminate the trial                                                         |      |
| 35 |                        |                                                                             |      |
| 36 |                        |                                                                             |      |
| 37 |                        |                                                                             |      |
| 38 | Harms                  | <a href="#">#22</a> Plans for collecting, assessing, reporting, and         | 10   |
| 39 |                        | managing solicited and spontaneously reported                               |      |
| 40 |                        | adverse events and other unintended effects of trial                        |      |
| 41 |                        | interventions or trial conduct                                              |      |
| 42 |                        |                                                                             |      |
| 43 |                        |                                                                             |      |
| 44 |                        |                                                                             |      |
| 45 | Auditing               | <a href="#">#23</a> Frequency and procedures for auditing trial             | 10   |
| 46 |                        | conduct, if any, and whether the process will be                            |      |
| 47 |                        | independent from investigators and the sponsor                              |      |
| 48 |                        |                                                                             |      |
| 49 |                        |                                                                             |      |
| 50 | Research ethics        | <a href="#">#24</a> Plans for seeking research ethics committee /           | 13   |
| 51 | approval               | institutional review board (REC / IRB) approval                             |      |
| 52 |                        |                                                                             |      |
| 53 |                        |                                                                             |      |
| 54 | Protocol               | <a href="#">#25</a> Plans for communicating important protocol              | 13   |
| 55 | amendments             | modifications (eg, changes to eligibility criteria,                         |      |
| 56 |                        | outcomes, analyses) to relevant parties (eg,                                |      |
| 57 |                        | investigators, REC / IRBs, trial participants, trial                        |      |
| 58 |                        |                                                                             |      |
| 59 |                        |                                                                             |      |
| 60 |                        |                                                                             |      |

|    |                       |                                                                            |                     |
|----|-----------------------|----------------------------------------------------------------------------|---------------------|
| 1  |                       | registries, journals, regulators)                                          |                     |
| 2  | Consent or assent     | <a href="#">#26a</a> Who will obtain informed consent or assent from       | 5, fig1             |
| 3  |                       | potential trial participants or authorised surrogates,                     |                     |
| 4  |                       | and how (see Item 32)                                                      |                     |
| 5  |                       |                                                                            |                     |
| 6  |                       |                                                                            |                     |
| 7  | Consent or assent:    | <a href="#">#26b</a> Additional consent provisions for collection and use  | n/a                 |
| 8  | ancillary studies     | of participant data and biological specimens in                            |                     |
| 9  |                       | ancillary studies, if applicable                                           |                     |
| 10 |                       |                                                                            |                     |
| 11 |                       |                                                                            |                     |
| 12 | Confidentiality       | <a href="#">#27</a> How personal information about potential and           | 9                   |
| 13 |                       | enrolled participants will be collected, shared, and                       |                     |
| 14 |                       | maintained in order to protect confidentiality before,                     |                     |
| 15 |                       | during, and after the trial                                                |                     |
| 16 |                       |                                                                            |                     |
| 17 |                       |                                                                            |                     |
| 18 |                       |                                                                            |                     |
| 19 | Declaration of        | <a href="#">#28</a> Financial and other competing interests for            | 13                  |
| 20 | interests             | principal investigators for the overall trial and each                     |                     |
| 21 |                       | study site                                                                 |                     |
| 22 |                       |                                                                            |                     |
| 23 |                       |                                                                            |                     |
| 24 | Data access           | <a href="#">#29</a> Statement of who will have access to the final trial   | 9                   |
| 25 |                       | dataset, and disclosure of contractual agreements                          |                     |
| 26 |                       | that limit such access for investigators                                   |                     |
| 27 |                       |                                                                            |                     |
| 28 |                       |                                                                            |                     |
| 29 |                       |                                                                            |                     |
| 30 | Ancillary and post    | <a href="#">#30</a> Provisions, if any, for ancillary and post-trial care, | 6                   |
| 31 | trial care            | and for compensation to those who suffer harm                              |                     |
| 32 |                       | from trial participation                                                   |                     |
| 33 |                       |                                                                            |                     |
| 34 |                       |                                                                            |                     |
| 35 | Dissemination         | <a href="#">#31a</a> Plans for investigators and sponsor to                | 11                  |
| 36 | policy: trial results | communicate trial results to participants,                                 |                     |
| 37 |                       | healthcare professionals, the public, and other                            |                     |
| 38 |                       | relevant groups (eg, via publication, reporting in                         |                     |
| 39 |                       | results databases, or other data sharing                                   |                     |
| 40 |                       | arrangements), including any publication                                   |                     |
| 41 |                       | restrictions                                                               |                     |
| 42 |                       |                                                                            |                     |
| 43 |                       |                                                                            |                     |
| 44 |                       |                                                                            |                     |
| 45 |                       |                                                                            |                     |
| 46 | Dissemination         | <a href="#">#31b</a> Authorship eligibility guidelines and any intended    | Use of              |
| 47 | policy: authorship    | use of professional writers                                                | professional        |
| 48 |                       |                                                                            | writers not         |
| 49 |                       |                                                                            | intended            |
| 50 |                       |                                                                            |                     |
| 51 |                       |                                                                            |                     |
| 52 |                       |                                                                            |                     |
| 53 | Dissemination         | <a href="#">#31c</a> Plans, if any, for granting public access to the full | Publication of full |
| 54 | policy: reproducible  | protocol, participant-level dataset, and statistical                       | protocol possibly   |
| 55 | research              | code                                                                       | with this           |
| 56 |                       |                                                                            | manuscript.         |
| 57 |                       |                                                                            |                     |
| 58 |                       |                                                                            |                     |
| 59 |                       |                                                                            |                     |
| 60 |                       |                                                                            |                     |

|    |                  |                     |                                                        |                  |
|----|------------------|---------------------|--------------------------------------------------------|------------------|
| 1  | Informed consent | <a href="#">#32</a> | Model consent form and other related                   | Are attached.    |
| 2  | materials        |                     | documentation given to participants and authorised     | English          |
| 3  |                  |                     | surrogates                                             | translations can |
| 4  |                  |                     |                                                        | be published as  |
| 5  |                  |                     |                                                        | appendices.      |
| 6  |                  |                     |                                                        |                  |
| 7  |                  |                     |                                                        |                  |
| 8  |                  |                     |                                                        |                  |
| 9  | Biological       | <a href="#">#33</a> | Plans for collection, laboratory evaluation, and       | 9                |
| 10 | specimens        |                     | storage of biological specimens for genetic or         |                  |
| 11 |                  |                     | molecular analysis in the current trial and for future |                  |
| 12 |                  |                     | use in ancillary studies, if applicable                |                  |
| 13 |                  |                     |                                                        |                  |
| 14 |                  |                     |                                                        |                  |
| 15 |                  |                     |                                                        |                  |

16 The SPIRIT checklist is distributed under the terms of the Creative Commons Attribution License CC-  
17 BY-ND 3.0. This checklist can be completed online using <http://www.goodreports.org/>, a tool made by  
18 the [EQUATOR Network](#) in collaboration with [Penelope.ai](#)  
19  
20  
21  
22  
23  
24  
25  
26  
27  
28  
29  
30  
31  
32  
33  
34  
35  
36  
37  
38  
39  
40  
41  
42  
43  
44  
45  
46  
47  
48  
49  
50  
51  
52  
53  
54  
55  
56  
57  
58  
59  
60
