# Supplementary material for: MAGDALENA: study protocol of a randomised, placebo-controlled trial on cognitive development at 2 years of age in children exposed to SSRI in utero
Source: PubMed Central journal article supplement — BMJ Open. 2018 Aug 5;8(8):e023281. doi: 10.1136/bmjopen-2018-023281 (PMC6078226; doi:10.1136/bmjopen-2018-023281), 2018-08-05
Supplement: bmjopen-2018-023281supp001.pdf [file bmjopen-2018-023281supp001.pdf]

EudraCT No: 2013-004444-31

# ***Effects and consequences for mother and child from treatment for depression***

***A prospective randomised, placebo- controlled, trial with internet-based cognitive behaviour therapy and sertraline or placebo for moderate depression in pregnancy***

---

Product: Zoloft® 25 mg

Substance: Sertraline

Phase of development *Phase IV*

Protocol number: *KWMP 001*

EudraCT Number: *2013-004444-31*

Sponsor: Mats Blennow, Department of Neonatology, Karolinska University Hospital and Karolinska Institutet (KI)

Coordinating PI: Katarina Wide, Department of Paediatrics, Karolinska University Hospital and KI

Principal Investigators: L. L. Gustafsson (Department of Laboratory Medicine, KI),  
M-L Dahl (Department of Laboratory Medicine, KI),  
J. Nasiell (CLINTEC, KI)  
V. Kaldo (Department of Clinical Neuroscience, KI)

EudraCT No: 2013-004444-31

Date: 2014-5-11 rev 20160307, rev 20161121, rev 20180406

Status: FINAL

Version: 5.0, 5.1A, 5.2, 5.3

1(27)

## Table of Contents

|                                                                                                                   |           |
|-------------------------------------------------------------------------------------------------------------------|-----------|
| <b>PROTOCOL SUMMARY</b> .....                                                                                     | <b>4</b>  |
| <b>ABBREVIATIONS</b> .....                                                                                        | <b>6</b>  |
| <b>SIGNED AGREEMENT OF THE TRIAL PROTOCOL</b> .....                                                               | <b>7</b>  |
| <b>1 THE DISEASE AND BACKGROUND INFORMATION</b> .....                                                             | <b>8</b>  |
| 1.1 MOOD DISORDERS AND PHARMACOTHERAPY DURING PREGNANCY .....                                                     | 8         |
| <b>2 TRIAL RATIONALE</b> .....                                                                                    | <b>9</b>  |
| <b>3 OBJECTIVES</b> .....                                                                                         | <b>10</b> |
| 3.1 PRIMARY OBJECTIVE .....                                                                                       | 10        |
| 3.2 SECONDARY OBJECTIVE .....                                                                                     | 10        |
| 3.3 TERTIARY OBJECTIVES .....                                                                                     | 10        |
| <b>4 ENDPOINTS</b> .....                                                                                          | <b>10</b> |
| 4.1 PRIMARY ENDPOINT.....                                                                                         | 10        |
| 4.2 SECONDARY ENDPOINT .....                                                                                      | 10        |
| 4.3 TERTIARY ENDPOINTS.....                                                                                       | 11        |
| <b>5 DESIGN</b> .....                                                                                             | <b>11</b> |
| 5.1 OUTLINE .....                                                                                                 | 11        |
| 5.2 SELECTION OF SUBJECTS .....                                                                                   | 13        |
| 5.3 RECRUITMENT BASE.....                                                                                         | 14        |
| <b>6 ASSESSMENTS AND PROCEDURES</b> .....                                                                         | <b>14</b> |
| 6.1 VISIT 0 (DAY -28 +-7DAYS WEEKS BEFORE START OF TREATMENT) 'INFORMED CONSENT'# 1 .....                         | 14        |
| 6.2 PHONE CONTACT (DAY -21 DAYS +- 14 DAYS BEFORE START OF TREATMENT) 'NURSE FOLLOW-UP' 15                        |           |
| 6.3 VISIT 1 (DAY-14 +- 7DAYS BEFORE START OF IMP) 'PSYCHIATRIST, INFORMED CONSENT #2' .....                       | 15        |
| 6.4 PHONE CONTACT (DAY -4 DAYS +- 2 BEFORE START OF TREATMENT) 'NURSE FOLLOW-UP'.....                             | 16        |
| 6.5 VISIT 2 (DAY 0 START OF TREATMENT), 'BASELINE, RANDOMISATION & TREATMENT START' .....                         | 16        |
| 6.6 VISIT 3 (WEEK 4 +- 6 DAYS) 'FIRST TREATMENT EVALUATION' .....                                                 | 17        |
| 6.7 VISIT 4 (WEEK 14 +- 6 DAYS) 'SECOND TREATMENT EVALUATION' .....                                               | 18        |
| 6.8 VISIT 5 (WEEK 18 +- 6 DAYS) 'AT DELIVERY' .....                                                               | 18        |
| 6.9 VISIT 6 (WEEK +22 +- 6 DAYS) 'FOUR WEEKS AFTER DELIVERY' .....                                                | 18        |
| 6.10 VISIT 7 (WEEK + 30 +- 2 WEEKS) '3 MONTHS AFTER DELIVERY' .....                                               | 19        |
| <b>PART II: THE CHILD BORN TO A MOTHER IN THE STUDY</b> .....                                                     | <b>19</b> |
| 6.11 VISIT 1 (+24 HOURS TO 48H AFTER DELIVERY) STUDY PAEDIATRICIAN .....                                          | 19        |
| 6.12 VISIT 2 (+ 48 HOURS AFTER DELIVERY) STUDY PAEDIATRICIAN .....                                                | 19        |
| 6.13 VISIT 3 (CHILD AT THREE MONTHS OF AGE) STUDY PAEDIATRICIAN AND 'NURSE FOLLOW-UP'= VISIT 7 FOR THE WOMEN..... | 20        |
| 6.14 VISIT 4 (CHILD AT TWO YEARS OF AGE) TO CHILD PSYCHOLOGIST AND STUDY PAEDIATRICIAN .....                      | 20        |
| <b>7 WITHDRAWAL OF SUBJECTS</b> .....                                                                             | <b>20</b> |
| 7.1 CRITERIA FOR WITHDRAWAL .....                                                                                 | 20        |
| <b>8 TREATMENT</b> .....                                                                                          | <b>20</b> |
| 8.1 DESCRIPTION OF INVESTIGATIONAL MEDICINAL PRODUCTS (IMP) .....                                                 | 20        |

EudraCT No: 2013-004444-31

Date: 2014-5-11 rev 20160307,rev 20161121, rev 20180406

Status: FINAL

Version: 5.0,5.1A, 5.2, 5.3

2(27)

|           |                                                       |           |
|-----------|-------------------------------------------------------|-----------|
| 8.2       | TREATMENT ASSIGNMENT .....                            | 21        |
| 8.3       | BLINDING AND CODE BREAKING .....                      | 21        |
| <b>9</b>  | <b>ALLOCATION TO TREATMENT .....</b>                  | <b>21</b> |
| 9.1       | PRIOR AND CONCOMITANT MEDICATION .....                | 21        |
| 9.2       | COMPLIANCE TO TREATMENT & PRODUCT ACCOUNTABILITY..... | 22        |
| 9.3       | CONTINUATION OF TREATMENT .....                       | 22        |
| <b>10</b> | <b>ASSESSMENT OF EFFICACY AND SAFETY .....</b>        | <b>22</b> |
| 10.1      | CLINICAL SAFETY ASSESSMENTS .....                     | 22        |
| 10.2      | LABORATORY SAFETY ASSESSMENTS.....                    | 23        |
| <b>11</b> | <b>PROCEEDINGS FOR ADVERSE EVENTS.....</b>            | <b>23</b> |
| 11.1      | DEFINITION OF ADVERSE EVENTS.....                     | 23        |
| <b>12</b> | <b>DATA MANAGEMENT.....</b>                           | <b>24</b> |
| 12.1      | STATISTICAL ANALYSIS .....                            | 24        |
| 12.2      | DETERMINATION OF SAMPLE SIZE .....                    | 24        |
| 12.3      | ANALYSIS OF RISK –BENEFIT .....                       | 25        |
| 12.4      | CONTROL OF QUALITY AND GUARANTEE OF QUALITY .....     | 25        |
| 12.5      | INSURANCE OF PATIENTS .....                           | 25        |
|           | <b>REFERENCES .....</b>                               | <b>26</b> |

## PROTOCOL SUMMARY

### PROTOCOL IDENTITY AND OBJECTIVES

EudraCT Number:

2013-004444-31

Protocol Title:

Effects and consequences for mother and child from treatment for depression. A prospective randomised, placebo-controlled, trial with internet-based cognitive behaviour therapy and sertraline or placebo for moderate depression in pregnancy

Trial Objectives:

#### **Primary objective**

To study the long-term consequences on cognitive development in children exposed to sertraline during pregnancy.

#### **Secondary objective**

To study if the effect of ICBT for pregnant women with moderate depression can be increased by adding sertraline

#### **Tertiary objectives**

a) To study the direct neonatal effects in children prenatally exposed to maternal sertraline treatment compared to exposure to maternal depression treated with only ICBT.

b) To study if add-on treatment with sertraline increases the risk for maternal bleeding and pregnancy complications

c) To study pharmacokinetic and genetic variations in the metabolism of sertraline in pregnant women and their children

d) To study associations between antenatal maternal depression and inflammatory and epigenetic changes in relation to treatment effects of SSRI in mother and child

### INVESTIGATIONAL MEDICINAL PRODUCTS

Test Product:

Sertraline, 25 mg and placebo

Pharmaceutical Form:

Tablets

Route of Administration:

Orally

EudraCT No: 2013-004444-31

Date: 2014-5-11 rev 20160307, rev 20161121, rev 20180406

Status: FINAL

Version: 5.0, 5.1A, 5.2, 5.3

4(27)

## METHODOLOGY

|                           |                                                                                                                                                                                                                                                                                       |
|---------------------------|---------------------------------------------------------------------------------------------------------------------------------------------------------------------------------------------------------------------------------------------------------------------------------------|
| Trial Design:             | Prospective, double blind, two armed, parallel clinical study                                                                                                                                                                                                                         |
| Dose/Duration:            | 25 mg, 50 mg, 75 mg, 100 mg and 150 mg for max 33 weeks                                                                                                                                                                                                                               |
| Primary Endpoint:         | The differences in cognitive development at 2 years evaluated by the standard Bayley Scales of Infant and Toddler Development third edition (BSID-III) <sup>®</sup> .                                                                                                                 |
| Sample Size calculations: | To detect a difference of 7 points (SD 0.5) with a power of 80% ( $\alpha$ : 0, 05) in the results in BSID-III. To detect a clinically significant difference, will require a sample of 73 participants in each group. Therefore 100 participants in each group would be appropriate. |
| Efficacy Parameters:      | MADRS-S ,MADRS,EPDS                                                                                                                                                                                                                                                                   |
| Safety Parameters:        | Adverse events, MADRS- S;MADRS, EPDS                                                                                                                                                                                                                                                  |

## POPULATION OF TRIAL SUBJECTS

|                                |                                                                                                                                                                                                                                                                                                       |
|--------------------------------|-------------------------------------------------------------------------------------------------------------------------------------------------------------------------------------------------------------------------------------------------------------------------------------------------------|
| Description of Trial Subjects: | Pregnant women with an untreated moderate depression according to SCID-I.                                                                                                                                                                                                                             |
| Number of Subjects:            | N=200,receiving treatment with ICBT parallel arms 1:1<br>N= 100 receive active drug treatment N= 100 placebo                                                                                                                                                                                          |
| Selection of subjects:         | Pregnant women, attending an antenatal clinic and planning to deliver at Karolinska University Hospital or other delivery clinics in Stockholm Healthcare Region which will be added when study is ongoing (path A). The pregnant women can also be recruited via social media and internet (path B). |

## TRIAL TIMETABLE

|                   |          |
|-------------------|----------|
| First Subject In: | Q 1 2016 |
| Last Subject In:  | Q4 2022  |
| Last Subject Out: | Q4 2024  |
| Study End         | Q1 2025  |
| Database lock     | Q4 2024  |

## STATISTICAL METHODS

Outcome assessments:  
Descriptive statistics will be assessed on patients' demographics. Adverse events will be reported in proportions in relation to

EudraCT No: 2013-004444-31

Date: 2014-5-11 rev 20160307,rev 20161121, rev 20180406

Status: FINAL

Version: 5.0, 5.1A, 5.2, 5.3

5(27)

active/placebo dose. Primary end point will be analysed in multivariate analyses (MVA).

#### NOTE ABOUT APPENDICES

The appendices to this study protocol (APPENDIX TO MAGDALENA STUDY PROTOCOL PUBLISHED IN BMJ OPEN year:volume:pages) including the informed consent forms are in Swedish. They are available at request from the corresponding author.

**Kommenterad [EH1]:** Please add the publication details here.

## ABBREVIATIONS

| Abbreviation | Explanation                                                |
|--------------|------------------------------------------------------------|
| AE           | Adverse Event                                              |
| AUDIT        | The Alcohol Use Disorder identification test               |
| BSID III®    | Bayley Scale of Infant and Toddler Development III ®       |
| CBT          | Cognitive Behaviour Therapy                                |
| CGI-S        | Clinical global impression scale                           |
| CRF          | Case Report Form                                           |
| CSQ          | Client Satisfaction Questionnaire                          |
| DMC          | Data Monitoring and Safety Committee                       |
| DUDIT        | The Drug Use Disorder Identification Test                  |
| EPDS         | Edinburgh Postnatal Depression scale                       |
| EQ-5D        | Europe Quality of Life                                     |
| HINE         | Hammersmith Infant Neurology Examination                   |
| HNNE         | Hammersmith Neonatal Neurology Examination                 |
| ICBT         | Internet-based Cognitive Behaviour Therapy                 |
| IMP          | Investigational Medicinal Products                         |
| ISI          | Insomnia Severity Index                                    |
| MADRS-S      | Montgomery Åsberg Depression (Self-Assessment Scale)       |
| MADRS        | Montgomery Åsberg Depression (Evaluator Assessment Scale)  |
| MAMA         | Maternal Adjustment and Attitudes scale 12 questions       |
| MPA          | Medicinal Product Agency                                   |
| MPAS         | Maternal Postnatal Attachment Scale                        |
| NAS          | Neonatal Abstinence Score                                  |
| PAI          | Prenatal Attachment Inventory                              |
| PSQ          | Premenstrual Syndrome Questionnaires                       |
| SAE          | Serious Adverse Event                                      |
| SCID-I       | Structured Clinical Interview according to DSM-IV R part I |
| SDQ          | Strengths and Difficulties Questionnaire                   |
| SPC          | Summary of Product Characteristics                         |
| SUSAR        | Suspected Unexpected Serious Adverse Reaction              |
| TCQ          | Treatment Credibility Questionnaire                        |

EudraCT No: 2013-004444-31

Date: 2014-5-11 rev 20160307, rev 20161121, rev 20180406

Status: FINAL

Version: 5.0, 5.1A, 5.2, 5.3

6(27)

## SIGNED AGREEMENT OF THE TRIAL PROTOCOL

### Statement of compliance

I have read and understood this protocol version 5.3 dated: 2018-04-06 with the study title: ***'Effects and consequences for mother and child from treatment for depression. A prospective randomised, placebo-controlled trial with internet-based cognitive behaviour therapy and sertraline or placebo for moderate depression in pregnancy.'*** I agree to conduct the study accordingly.

### ***Coordinating Principle Investigator***

*Katarina Wide, PhD, associate professor*  
Department of Paediatrics  
ALB  
Karolinska Universitetssjukhuset, Huddinge

\_\_\_\_\_  
Date 180406

### ***Sponsor***

*Mats Blennow, Professor*  
Department of Neonatology  
ALB  
Karolinska Universitetssjukhuset, Huddinge

\_\_\_\_\_  
Date 180406

EudraCT No: 2013-004444-31

Date: 2014-5-11 rev 20160307, rev 20161121, rev 20180406

Status: FINAL

Version: 5.0, 5.1A, 5.2, 5.3

7(27)

## 1 THE DISEASE AND BACKGROUND INFORMATION

Depression occurs in 5-10% of all pregnant women.[1, 2] The prevalence is increased during the pregnant-state compared to the non-pregnant state as well as during the first three months after delivery[1, 3, 4] and can predispose to suicide.[5, 6] In addition, depression increases the risk for preeclampsia and premature delivery.[7] Also a disturbed attachment between mother and child in the new-born period has been reported.[7] Selective serotonin reuptake inhibitors (SSRI) are a class of medicines widely used to treat a number of psychiatric disorders. The Swedish national guidelines to treat pregnant women with moderate depression recommend cognitive behaviour therapy (CBT), interpersonal psychotherapy, or treatment with SSRI.[6] Even though there is substantial evidence supporting the effectiveness of CBT in non-pregnant patients the majority of patients are not treated at all. When medical treatment is used it is usually with SSRI. Only a few studies have assessed the effectiveness of CBT in perinatal depression.[8] In antenatal and postnatal major depression combination treatment with CBT and antidepressants appear to be more effective than antidepressant medication alone, whereas antidepressant therapy alone appears more effective than CBT alone.[9]

An increasingly used alternative to traditional CBT in individual or group format is treatment with a web-based self-help program with active therapist support via the Internet, i.e. internet-based cognitive behaviour therapy (ICBT). The content is not different from regular CBT but is delivered in a different way. ICBT has been shown to be efficient for a range of conditions including depression,[10] with effects comparable to traditional CBT[11] and also producing positive effects when implemented in regular care.[12] The treatment is provided via a secure website where the patients log in to receive the treatment material, usually in the form of separate 'treatment modules' with text and media where the target problem and treatment methods are described and homework assignments are given.[13] The ICBT therapeutic protocol in this study has been modified to pregnant women both in length and in contents.[8] The main function for the therapist is to be supportive and clarify the information, review the progress, give participants feedback, and assist and remind participants not working actively with the treatment. Gradually the therapists guide the participants to access the treatment modules in a specific order. The patient and the therapist work cooperatively with the ICBT components making them relevant in patient's everyday life. Each module, and especially the homework related to the module, is examined by a set of questions. Patients receive feedback from the therapist after each module and also have the opportunity to ask questions when needed. ICBT has been found to be effective in several randomised controlled trials in patients with a long range of psychiatric and medical problems, including moderate depression.[10] ICBT has the potential to be more cost-effective and accessible compared to traditional formats.

### 1.1 Mood Disorders and Pharmacotherapy During Pregnancy

In clinical practice the standard management of pregnant women with moderate depression is treatment with SSRI. Serotonin crosses the placenta and enters the fetal circulation which can influence the fetal brain. Effects on the developmental process of serotonin on the fetal brain have been shown in animal studies.[14, 15] Effects similar to the 'serotonergic syndrome' observed in adults have been reported in newborns exposed to SSRIs prenatally. These infants display symptoms of jitteriness, irritability, difficulties to maintain body temperature, feeding difficulties and in some cases even seizures.[15] Even though studies have not shown any increased risk for malformations in children exposed to SSRI in fetal life several reports and large registry based studies indicate an increased risk for neonatal complications.[16-20] The SSRI-drug sertraline that is commonly used during pregnancy shows wide variation in plasma concentrations between subjects - up to 15-fold for the same dose in non-pregnant subjects. The concentration of the main demethylated metabolite with limited inhibitor effect on serotonin reuptake exceeds that of sertraline itself. No clear relationship between either effect or

EudraCT No: 2013-004444-31

Date: 2014-5-11 rev 20160307, rev 20161121, rev 20180406

Status: FINAL

Version: 5.0, 5.1A, 5.2, 5.3

8(27)



adverse events are demonstrated for sertraline. Data on the disposition of sertraline during pregnancy is limited. Polymorphisms of the sertraline metabolizing enzyme CYP2C19 might explain the variability in drug concentrations between patients.[21] The role of genetic factors for the variability of plasma sertraline concentrations is poorly known in pregnant women as well as the role of the pregnancy itself on drug disposition.

Maternal depression as such may also have an effect on the central nervous system and the autonomic regulation in the new-born infant, induced by physiological changes as increased levels of plasma cortisol. Maternal depression and anxiety seem to inhibit the placental enzyme (11-beta-hydroxysteroid dehydrogenase) activity, causing increased and potentially toxic levels of cortisol in the fetus.[22] Furthermore, epigenetic mechanisms such as DNA methylation of cortisol, glucocorticoid and serotonin receptors and their pathways may be involved.

Also telomere biology may be involved in increased vulnerability to disease in the infant.[17] Epigenetic changes with reduced telomere length in leucocytes have been shown in patients with depression. Pre- and perinatal stressors in children have also been shown to effect telomere length.[22-24] Epigenetic changes in depression may be related to inflammatory and hormonal factors and seem to be reversible by treatment.[25]

Maternal stress factors may therefore contribute to changed neurotransmission in the developing fetal brain. Data on the long-term consequences of the unborn child's cognitive development after prenatal exposure to SSRI and/or maternal stress are scarce. Only a few studies using small study samples have been published.[26-31]

## 2 TRIAL RATIONALE

The etiology of depression during pregnancy is unknown. Pregnancy-related physical and hormonal changes as well as psychosocial stressors might render women vulnerable for stress activation. Despite lack of scientific evidence for pharmacological and psychological treatment of antepartum moderate depression, CBT is recommended as first choice treatment (The National Board of Health and Welfare, National guideline for Depression). CBT is generally less available and as a consequence the majority of pregnant women with moderate depression are not treated at all. The ones who receive treatment are recommended SSRI. International meta-analyses suggest greater effect when combining traditional psychological and pharmacotherapy. To our knowledge no prior placebo-controlled clinical trials have assessed if combination treatment is superior to treatment with internet-based CBT alone. Research concerning physiological and psychological factors that negatively influence the unborn child and maternal well-being are crucial to investigate.

This study targets women with moderate depression during pregnancy. We will use ICBT with or without SSRI in a randomised placebo-controlled trial. This study can help to fill the gap of knowledge on the consequences of antidepressive therapy for the children as well as in field of maternal treatment of depression. The study is divided into two parts 1) The pregnant women with moderate depression and 2) the children born to the women with moderate depression. Our research group has worked extensively with ICBT and has a large experience and publications of this treatment.

The **overall aim** is to study the neonatal effects and the long-term consequences on cognitive development in children exposed to sertraline for maternal depression during pregnancy. We also seek to optimize the treatment of depression in pregnant women by comparing the add-on efficacy and

EudraCT No: 2013-004444-31

Date: 2014-5-11 rev 20160307, rev 20161121, rev 20180406

Status: FINAL

Version: 5.0, 5.1A, 5.2, 5.3

9(27)

safety of a combination of internet-based cognitive behaviour therapy (ICBT) and SSRI-treatment with ICBT-therapy alone.

### 3 OBJECTIVES

#### 3.1 Primary Objective

The primary objective is to study the long-term consequences on cognitive development in children prenatally exposed to maternal sertraline treatment compared to exposure to maternal depression treated with only ICBT.

#### 3.2 Secondary Objective

The secondary objective is to evaluate the safety and the efficacy of sertraline in addition to treatment with ICBT.

#### 3.3 Tertiary Objectives

These include:

- a) To study the direct neonatal effects in children prenatally exposed to maternal sertraline treatment compared to exposure to maternal depression treated with only ICBT.
- b) To study if add-on treatment with sertraline increases the risk for maternal bleeding and pregnancy complications.
- c) To study pharmacokinetic and genetic variations in the metabolism of sertraline in pregnant women and their children.
- d) To study associations between antenatal maternal depression and inflammatory, epigenetic and telomere biology changes in relation to treatment effects of SSRI in mother and child.

### 4 ENDPOINTS

#### 4.1 Primary Endpoint

Cognitive development at 2 years of age evaluated by the standard Bayley Scales of Infant and Toddler Development v 3 (BSID-III) in children exposed to maternal treatment with ICBT and sertraline compared to exposure to ICBT only.

#### 4.2 Secondary Endpoint

Add-on effect of sertraline measured in difference i) in self-report of depressive symptoms (MADRS-S), ii) in rate of remission from depression (measured by diagnostic psychiatric interview with MADRS at 12 weeks, 14 weeks, and 30 weeks (= 3 months postpartum) of treatment.

EudraCT No: 2013-004444-31

Date: 2014-5-11 rev 20160307, rev 20161121, rev 20180406

Status: FINAL

Version: 5.0, 5.1A, 5.2, 5.3

10(27)

### 4.3 Tertiary Endpoints

These are the exploratory parts of the study.

- a) To study the neonatal effects in children exposed to sertraline during pregnancy
  - Differences in admission rates to neonatal care units will be compared between groups. Infant motor behaviour examined with standardized methods (HNNE) and neonatal abstinence effects are scored with NAS.
- b) To study if add-on treatment with sertraline increases the risk for maternal bleeding and pregnancy complications
  - Evaluation of the risk for maternal postpartum bleeding in ml and postpartum haemoglobin day 2. APTT/TPK and placenta biopsy for evaluation of genetic differences in activity of 11-beta-hydroxysteroid dehydrogenase type 2 and in pharmacological metabolism, DNA methylation for telomere length and telomerase activity.
  - Evaluation of the risk for the pregnancy complications preeclampsia, placental abruption and increased caesarean section rate.
- c) To study pharmacokinetic and genetic variations in the metabolism of sertraline in pregnant women and their children
  - Plasma concentrations of sertraline and genetic variations in the metabolism of sertraline, genetic variants of metabolizing enzymes/transporters. The pharmacological and pharmacokinetic assessments include: plasma sertraline concentrations, effects of various genetic variants controlling drug metabolising and drug transporters on sertraline disposition and metabolism. Exploration of relationship between plasma sertraline concentrations and prolactin levels.
- d) To study associations between antenatal maternal depression and inflammatory and epigenetic changes in relation to treatment effects of SSRI in mother and child
  - Effects on levels of s-hCG and cytokines. Telomerase activity through the umbilical vein and buccal swabs for analysis of epigenetic variables and telomere biology. Epigenetic and telomere biology assessments: DNA methylation, telomere length and telomerase activity

## 5 DESIGN

### 5.1 Outline

This is a prospective, randomised, placebo-controlled, double blind, two parallel, single centre clinical investigation of pregnant women with moderate depression with multiple delivery units. The subjects will visit the centre approximately 6 times during a period of 13 months from early-mid pregnancy until two years after delivery. The patients are recruited via two paths; (A) from the antenatal clinics in Stockholm Healthcare Region (2,3 million people) and (B) via a direct application and screening on the internet, where an initial telephone interview is used for screening, to ensure they have contact with regular antenatal care and to book an appointment with a psychiatrist.

EudraCT No: 2013-004444-31

Date: 2014-5-11 rev 20160307, rev 20161121, rev 20180406

Status: FINAL

Version: 5.0, 5.1A, 5.2, 5.3

11(27)

All subjects will be consented before any study-specific procedures and assessed for eligibility within three to five weeks and consented for treatment one week before treatment start. The screening period in regular care (path A) starts when the pregnant women attend the antenatal clinic (pregnancy week 9-21). They will obtain written and oral information about the study through their attending midwife and are asked to fill in the Edinburgh Postnatal Depression Scale (EPDS) to screen for potential depressive disorder. Women will be informed that they at this stage only consent to participate in screening and if the screening is positive to be contacted for psychiatric assessment (verbal informed consent #1, which covers only the initial, non-pharmacological, part of the study). They will receive information about how to assess the internet-based screening questionnaires (MADRS-S, STAI, AUDIT, DUDIT, EQ5D, ISI), questions on previous somatic and psychiatric health issues, sociodemographic factors and questions on perceived health of the participant's partner. Before completing these forms, they have to read and agree to the written informed consent #1. Women screening positive for potential depression (EPDS >12 points) will be contacted by a research nurse specialized in psychiatry for a second evaluation of eligibility and scheduled for a visit to the study psychiatrist. The optimal cut-off score on the EPDS scale for screening purposes is 13 or more points (standard error coefficient of 1.09 and c-statistics of 0.84) which have been shown to give 77% sensitivity.[32]

Women recruited directly via internet (path B) will start by completing a slightly modified version of the written informed consent #1 and then complete the same internet-based screening questionnaires, with some additional questions. Women are then contacted via telephone for further screening, including all questions asked at the antenatal clinic in recruitment path A and confirming that they are receiving regular maternal care. Women not suitable for inclusion are referred to regular health care services if needed. Eligible women are booked for a time to visit the psychiatrist.

After assessment and information about the study by the study psychiatrist, the women will sign an informed consent (informed consent #2, covering the rest of the study). Treatment with ICBT and randomised treatment with either active treatment with sertraline or placebo will start after the internet-based screening questionnaires have been completed in conjunction with a visit to the study centre approximately one week later. Women uncertain about participation at the time of psychiatric assessment are offered to discuss with the study obstetrician when visiting the study centre one week later where they can provide informed consent (informed consent #2).

The research nurse in psychiatry or the research midwife will make a telephone call within 1 week after the first visit to schedule an appointment at the study site and address any difficulties to assess the internet treatment platform.

Once included the patients will have scheduled visits to the specialists' antenatal clinic at Karolinska University Hospital Huddinge or at other participating centres to measure vital signs, blood sample collection, accountability of IMP and adverse event report. The last visit is performed 12 weeks after delivery.

When starting ICBT by logging in on the internet-treatment platform after randomisation, pre-treatment self-report measures will be completed (MADRS-S, STAI-s, ISI, EQ5D, Life Events, PSQ, PAI, MAMA). At the follow-up after the delivery the women are asked to complete the MPAS, ISI, TCQ, client satisfactory questionnaire, questions on adverse events (AE), questionnaires on basic socio-demographic data and health as well as questions on how they experience the psychiatric status of their partner. This last questionnaire will be repeated 3 months after the delivery. During the 12-week internet-CBT treatment patients self-assess symptoms weekly with MADRS-S. Post ICBT-treatment (week 12), week 14 and week 30 self-reports are also completed online.

A psychologist and a research nurse specialized in psychiatry will work closely together with a psychiatrist to assess the best psychiatric and safety management of the patients. The psychologist supervises and monitors each patient individually on a weekly basis during the 12 weeks of ICBT for an

EudraCT No: 2013-004444-31

Date: 2014-5-11 rev 20160307, rev 20161121, rev 20180406

Status: FINAL

Version: 5.0, 5.1A, 5.2, 5.3

12(27)

early detection of symptoms that indicate disease progress or improvement. Any symptoms that require further expertise and support by a psychiatrist will be considered. The psychiatrist will consider all aspects of the patients' well-being in a detailed assessment rating the strength of clinical evidence of stressors and psychiatric status and level of functioning at each visit to the clinic.

All visits to the study psychiatrist and interaction with the unit for Internet Psychiatry are documented in health care journals (Take Care® or Obstetrics®) or systems used on site according to routines and practices at the psychiatric services for Stockholm Healthcare Region and Karolinska University Hospital and at additional study sites.

## 5.2 Selection of Subjects

### Inclusion Criteria (all of the below)

1. Female > 18 years old
2. Pregnant, gestational week 9-21
3. Verified moderate depression according to SCID-I with or without concomitant anxiety disorder.
4. Signed informed consent
5. Able to understand the Swedish language orally and in written, write in Swedish and able to use the internet for the ICBT, including having succeeded in filling out online questionnaires.
6. Are willing to participate to all study visits
7. Plans to give birth at the Department of Obstetrics at Karolinska University Hospital, Huddinge or other delivery units within Stockholm Healthcare Region.

### Exclusion Criteria (any of the below)

1. Known drug or alcohol abuse
2. Serious psychiatric disorder such as psychosis, bipolar disorder, severe personality disorder, ADHD/ADD with diagnosis and symptoms in adult age, autism, mental retardation and severe melancholic or psychotic depression.
3. Known idiosyncrasy to sertraline (Zoloft®) or allergy to any of excipients in the Zoloft product
4. Ongoing drug therapy with antidepressants, mood-stabilizers, central stimulants, antiepileptic drugs, opiates, insulin, oral anti-diabetics, antiarrhythmics or steroids.
5. Any severe somatic disease that necessitates regular treatment with systemic steroids, severe heart and lung disease, kidney disease, liver disease, diabetes mellitus or epilepsy with drug treatment.
6. Women who either during screening or treatment on self-assessment forms (MADRS-S: 4 or more points on question about suicidal intention (question 9)) report symptoms of severe suicidal thoughts or suicide plans will be contacted for structured suicide risk assessment by telephone according to clinical routine at the unit for internet psychiatry. If judged necessary patients will be booked for psychiatric assessment by the study nurse. If urgent assessment or care is judged necessary, referral to psychiatric emergency departments will be made according to the same routine as in regular care.

Also women, who contact the study personnel and report symptoms of suicidal thoughts or suicide plans will receive psychiatric assessment as specified above. Women who according to psychiatric assessment have a high suicidal risk will be excluded from the study. These women will be actively transferred into necessary psychiatric treatment as usual.

EudraCT No: 2013-004444-31

Date: 2014-5-11 rev 20160307, rev 20161121, rev 20180406

Status: FINAL

Version: 5.0, 5.1A, 5.2, 5.3

13(27)

7. Other factors that are clinically significant and could jeopardize study results or its intention, as judged by study psychiatrist or study obstetrician.

### 5.3 Recruitment Base

Concerning recruitment path A (via regular maternal care), with an estimated number of 30 000 annual deliveries in the Stockholm Healthcare Region and an estimated rate of depression among pregnant women of 5%, we expect 1500 pregnant women with depression in the catchment area. We estimate 0,5%, 150 patients, starting treatment with SSRI during the first 21 weeks of pregnancy. An inclusion rate estimated to 1/4 results in recruiting 35 pregnant women/year for the study. The alternative recruitment path (B), via media and internet, will be used to increase the speed of inclusion. Since many years there is a special outpatient clinic for pregnant women with depression or anxiety at Karolinska University Hospital, Huddinge. The clinic is a joint venture between the Department of Obstetrics and Gynaecology and the Department of Psychiatry in Stockholm Healthcare Region.

## 6 ASSESSMENTS AND PROCEDURES

### 6.1 Visit 0 (Day -28 +-7days weeks before start of treatment) 'Informed Consent'# 1

Pregnant patients planning to deliver at Karolinska University Hospital Huddinge or other delivery units within Stockholm Healthcare Region. They should be pregnant approximately in **gestational week 9-21** will be informed about the study during a regular visit to their antenatal health clinic by their attending midwife (recruitment path A). All these women (except those as specified in the exclusion criteria, see section 5.2 for details) will receive oral and written information about the nature of the trial by their attending midwife and agree to participate in the first part of the study (oral informed consent #1).

At this stage, they will only agree to participation to screening and, if being screened positive, to complete more screening questionnaires via the internet and perform a visit for a diagnostic and clinical assessment by a psychiatrist. After the oral informed consent patients will be asked to complete the Edinburgh Postnatal Depression Scale (EPDS) to screen for potential depressive disorder. The written information about the trial will contain a description of the internet-CBT treatment and how to log on to the internet platform [www.internetpsykiatri.se](http://www.internetpsykiatri.se), where they will choose their personal password and register their mobile phone number to which they will get a text message with a temporary code for each time they log on to the internet platform. The EPDS will be collected and evaluated by the research midwife on a weekly basis. Women scoring >12p will be encouraged to obtain the login at [www.internetpsykiatri.se](http://www.internetpsykiatri.se) if they agree to participation in the study.

Through [www.internetpsykiatri.se](http://www.internetpsykiatri.se) the women will log in to the internet platform at the Internet Psychiatry Unit at Psychiatry Southwest, used to administer web-based questionnaires and to later deliver ICBT. The advantage of the electronic system is that it can be accessed and used by patients from geographically different locations. On the internet platform they will complete the written informed consent #1 and then be asked to deliver information about their choice of delivery hospital, current drug therapy, current mental and somatic disorders, questions on perinatal current and previous somatic and mental symptoms. They are also to answer questions on perceived health of the participant's partner, practical questions on ability and suitability to take part in the study, and fill out the established self-report questionnaires PAI, AUDIT, DUDIT, MADRS-S, ISI, STAI, EQ5D, questionnaire on parity, number of children, country of birth and sociodemographic background. This will take about 30-45 minutes.

EudraCT No: 2013-004444-31

Date: 2014-5-11 rev 20160307, rev 20161121, rev 20180406

Status: FINAL

Version: 5.0, 5.1A, 5.2, 5.3

14(27)

There is also a direct way to apply for participation in the study (recruitment path B). Here, women find information about the study in articles or advertisement in media or on the internet, and if interested they find more information at [www.magdalenastudien.se](http://www.magdalenastudien.se) from where they are guided to the alternative screening questionnaire at [www.internetpsykiatri.se](http://www.internetpsykiatri.se). This starts by completion of a slightly adapted version of the written informed consent #1, followed by the same internet-based screening-questionnaires, with the following added; EPDS, contact details, and questions about gestational week, pharmacological treatments, somatic conditions, language skills, computer skills, internet availability, age, current maternal care/clinic, and if they can accept having their delivery at the most nearby study centre. This will take about 40 to 60 minutes.

### **6.2 Phone contact (Day -21 days +- 14 days before start of treatment) 'Nurse follow-up'**

**Patients are now in gestational week 10-22.** For women recruited via path A, the research nurse in psychiatry or the research midwife will contact the women who have screened positive (EPDS >12 points). The reason for this call is to do a new clinical assessment on the woman's health situation, to give the woman possibility to address questions about the study, and to check whether they were able to obtain log-in for the internet-CBT platform at [www.internetpsykiatri.se](http://www.internetpsykiatri.se). The women will be reminded to use the web-based self-assessment instruments if they have not already done that and are informed about the scheduled visit to the psychiatrist. More phone calls and text messages will be used to remind the women to fill out the web-based questionnaires. All women recruited via path B will be contacted via telephone when they have completed all internet questionnaires, for further information but also for further screening. The EPDS and all the inclusion criteria checked at the antenatal clinic in recruitment path A will be cross-checked. Eligible women are informed about the first scheduled visit to the psychiatrist.

Regardless of recruitment path, women with EPDS >12 points but not eligible according to inclusion and exclusion criteria will be offered to receive referral for psychiatric assessment. The research midwife/research psychiatric nurse will contact the woman's attending midwife and inform them where to refer the patient for further psychiatric assessment. The midwives keep a screening log of all subjects that have performed screening and will document in the screening log patients that decline further participation.

Women reporting more than 2 points on the EPDS question on suicidality or 4 or more points on the suicidality item in MADRS-S will be contacted by phone by a psychiatric nurse for a structured telephone suicide assessment. If needed, the women are referred to the appropriate level of care based on evaluation by the psychiatrist.

### **6.3 Visit 1 (Day-14 +- 7days before start of IMP) 'Psychiatrist, Informed Consent #2'**

**Patients are now in gestational week 11-23.** Visit to perinatal psychiatrist at the specialist antenatal health clinic, Karolinska University Hospital Huddinge or at other study sites in Stockholm Healthcare Region. The psychiatrist will perform a clinical psychiatric assessment and evaluate the women with the Computerized Structured Clinical Interview for DSM-IV Axis I Disorders (SCID-I) and Clinical Global Impression Scale (CGI-S) to evaluate general symptom severity and MADRS. The women who fulfil criteria for moderate depression according to SCID-I and have no exclusion criteria will be asked to sign the informed consent #2 on the treatment with ICBT and the randomised controlled trial with treatment with sertraline or placebo.

The women who have failed to complete the web-screening are informed that this is a requirement for participation in the study. They will receive more guidance and hands-on-help in how to log in to [www.internetpsykiatri.se](http://www.internetpsykiatri.se) if necessary.

EudraCT No: 2013-004444-31

Date: 2014-5-11 rev 20160307, rev 20161121, rev 20180406

Status: FINAL

Version: 5.0, 5.1A, 5.2, 5.3

15(27)

Women uncertain about participation at the time of psychiatric assessment or women who have not yet completed necessary web-screening are offered to discuss with the study obstetrician when visiting the study centre one week later when they can provide informed consent (informed consent #2). All study participants will be documented in an inclusion log. Those not consenting to participate or not fulfilling criteria for moderate depression in the study are offered treatment as usual and will be documented in the screening log as screening failure.

Please note! Patients who are assessed having a high suicide risk will be excluded from further participation in the study and will be recorded as 'screening failure'. They will be referred to a psychiatric clinic for further evaluation and treatment according to clinical routines.

#### **6.4 Phone contact (Day -4 days +- 2 before start of treatment) 'Nurse follow-up'**

**Patients are now in gestational week 12-25.** All patients who visited the psychiatrist and confirmed further participation in the study will be contacted by the study midwife. The reason for this call is to give the women the possibility to address questions about the study and to check whether they were able to obtain log-in for the internet-CBT platform (electronic identification and log in to the account at 'My health care contacts'). Women not having been able to fill out the web-screening are informed that this is a required for participation in the study. If necessary, more guidance in how to log in to [www.internetpsykiatri.se](http://www.internetpsykiatri.se) is given.

Women who were uncertain about participation at the time of psychiatric assessment and who want further information for decision to participate in the study are scheduled for a visit to the study obstetrician. This visit is scheduled to the study centre one week later where they can provide informed consent (informed consent #2).

Women are scheduled for a visit to the antenatal clinic within the following week (research midwife). Patients are instructed to be fasting from midnight.

#### **6.5 Visit 2 (Day 0 Start of treatment), 'Baseline, Randomisation & Treatment Start'**

**Patients are now in gestational week 13-26.** Visit at study site.

The investigator will review inclusion criteria, concomitant medication and fill in the 'Eligibility Form' in the CRF. If eligible with a completed web-screening, patients will be randomised according to standard procedures. This will be stated also in patients' medical record (randomisation number, storage of coded envelopes etc.). This means that only patients who are able to use the website [www.internetpsykiatri.se](http://www.internetpsykiatri.se) are eligible to participate in the study as specified in inclusion criteria 5. Patients that have not completed the internet questionnaire at this point might be given the opportunity to do so if the time permits and if it is possible to schedule a new meeting with the research midwife to continue Visit 2.

Any adverse events will be actively asked for and documented. The following blood samples will be collected: for endocrinological (TSH, prolactin), inflammatory (cytokines), and basic blood parameter analyses (Hb, MCV, MCHC), APTT as well as for epigenetic and telomere biology variables (leucocytes for telomere length, telomerase activity (RNA), DNA methylation), and DNA to study genetic differences in activities of drug metabolizing enzymes and drug transporters. The total volume of blood for the whole study period is 200ml. All blood samples except for haemoglobin and thyroid hormones will be frozen and analysed later. Haemoglobin and thyroid hormones will be analysed. Cell separation will be performed within 6 hours for the blood samples for epigenetic variables and telomere biology.

If the haemoglobin or thyroid hormone concentrations are impaired the women will receive regular treatment according to standard procedures. Further, vital signs (height, weight, pulse and blood pressure) for 'baseline' evaluation will be measured. The patients are instructed to store the investigational medical product (IMP) as instructed and carefully follow the dosing scheme.

EudraCT No: 2013-004444-31

Date: 2014-5-11 rev 20160307, rev 20161121, rev 20180406

Status: FINAL

Version: 5.0, 5.1A, 5.2, 5.3

16(27)



The patients will receive a 'subject diary' with contact details of involved staff and information regarding each of the following visit. There they will find written instructions on how to report and who to call if acute psychiatric services are required. This subject information also includes contact details on who to call if thoughts or feelings become overwhelming. The subject diary will be available as a document in the internet platform for the ICBT.

After the visit, the research midwife contacts the coordinator of the internet treatment to inform them that the patient is about to start treatment. The coordinator decides on a therapist that will contact the patient to present themselves, give some basic information about the internet treatment and answer question that concerns the internet treatment.

Please note! All subjects are informed that in any emergency situation, they should phone the Swedish Emergency Number 112 and/or visit the emergency department as in usual care. The code for the study drug can be broken at any time if necessary by the principal investigator or by any of the physicians to whom the principal investigator has delegated the responsibility.

Support and supervision regarding the ability to use the treatment platform for the ICBT is performed on site. Internet psychiatric treatment will be started at the same time as the pharmacological treatment and will continue for 12 weeks. The PRE-measurement in conjunction with start of ICBT treatment include: Women will be asked to complete the web-based self-assessment instruments in the pre-treatment assessment: MADRS-S, STAI-S, EQ5D, Life Events, PSQ, PAI, ISI, EPDS

During the internet treatment the women will self-assess their symptoms weekly with MADRS-S. At treatment day 24-34 (week 4) self-assessment with EQ5D, PAI, and ISI will be performed via internet, together with questions on how the patients perceive and use the internet treatment and the drug treatment, including adverse events (and their perceived relation to each treatment). A question if they believe they have received the active drug or the placebo will be administered to act as a blinding control. Also, two versions of the Treatment Credibility Questionnaire (TCQ), one each for the ICBT part and the pharmacological part of treatment respectively will be administered. These instruments will also be administered at week 2.

### **6.6 Visit 3 (week 4 +- 6 days) 'First Treatment Evaluation'**

**Patients are now in gestational week 17-30.** Patients will have telephone contact or visit the site for consultation and for clinical assessment by the research nurse in psychiatry. At this visit also safety and effect assessments, CGI-S and MADRS will be carried out. If the extra internet-measures at treatment week 4 have not been filled in, the participant is encouraged to log in and do this at the site. The midwife/research nurse in psychiatry makes an 'Accountability log' on the IMP returned to site and controls for any perceived adverse events. If the patient according to diagnostic assessment with MADRS still fulfils criteria for moderate depression, the research nurse in psychiatry contacts the psychiatrist for increasing the dose of IMP or placebo. In these cases the patients have to collect a new container with an increased amount of tablets and return the previous one to the research midwife.

Blood sample collection to measure the following parameters will be collected: prolactin, full blood count, plasma sertraline serum concentration will be collected. Basic parameters (weight, pulse, blood pressure) and concomitant medication will be measured and documented.

EudraCT No: 2013-004444-31

Date: 2014-5-11 rev 20160307, rev 20161121, rev 20180406

Status: FINAL

Version: 5.0, 5.1A, 5.2, 5.3

17(27)

#### **Post-treatment self-assessment after ICBT (gestational week 27-38)**

The ICBT will be terminated after 12 weeks (in gestational week 27-38). Patients will fill in internet self-assessments (POST) at the end of the ICBT (see below, visit 4), where they also report adverse events.

#### **6.7 Visit 4 (week 14 +- 6 days) 'Second Treatment Evaluation'**

**Patients are now in gestational week 26-39.** Patients will have telephone contact or visit the site for consultation for clinical assessment by the research nurse in psychiatry, and also safety and effect assessments, CGI-S and MADRS will be completed. The midwife or the research nurse in psychiatry makes an 'Accountability log' and controls for experienced adverse events. If the post-treatment internet self-assessment has not already been completed, the women will be asked to use the internet platform to self-assess with MADRS-S, STAI-s, EQ-5D, ISI, adverse events, satisfaction with treatment (CSQ) including additional questions on how the patients perceive and use the internet treatment and the drug treatment, blinding control and PAI. At the end of the treatment, the ICBT-therapist will also make a short, structured rating of the participant's compliance to the ICBT manual. Blood sample collection for the following parameters: prolactin, HCG, inflammatory, sertraline plasma concentration, full blood count and epigenetic and telomere biology variable. Vital signs and concomitant medication will be documented.

If the woman according to psychiatric assessment with MADRS-S still fulfils criteria for moderate depression, the research nurse in psychiatry contacts the psychiatrist for increasing the dose of the IMP. In these cases the patients have to collect a new container with an increased amount of tablets and return the previous to the research midwife.

#### **6.8 Visit 5 (week 18 +- 6 days) 'At Delivery'**

NOTE: Part II of the study, Follow up of the infants born to study mothers, begins at the same time. (See paragraph 6.11.)

**Patients are now in gestational week 40 or in labour,** at delivery unit.

At the previous visit the research nurse has noted in the computerized medical record Obstetrix® that the following blood samples will be collected at the delivery:

From umbilical cord from the infant to measure: plasma concentration of sertraline, genetic variants for controlling activity of enzymes regulating the metabolism of sertraline, epigenetic and telomere biology variables in leucocytes.

From the woman: a placental biopsy to measure 11-beta hydroxyl steroid dehydrogenase type 2 and for epigenetic and telomere biology analyses in placenta.

In the maternity ward the following morning after delivery: full blood count, prolactin, plasma concentration of sertraline. The maternal blood loss during delivery and infant Apgar points are documented in CRF and in the medical record (Obstetrix®).

The midwife will schedule a visit to the antenatal clinic within a 4 weeks period including a visit to the psychiatrist.

The women are instructed to continue their dose of IMP as prescribed.

The women are informed that they will be observed in the hospital for at least 48 hours after delivery.

See paragraph 6.11 for the evaluation of the infants!

#### **6.9 Visit 6 (week +22 +- 6 days) 'Four weeks after Delivery'**

Visit at site. Patients will visit the site for clinical assessment by the psychiatrist, and for safety and effect assessments with CGI-S, EPDS and MADRS. The midwife makes an 'Accountability log' on drugs returned to site and controls for adverse events.

EudraCT No: 2013-004444-31

Date: 2014-5-11 rev 20160307, rev 20161121, rev 20180406

Status: FINAL

Version: 5.0, 5.1A, 5.2, 5.3

18(27)

Self-assessment rating scales have already been filled out on the internet before the visit including EQ5D, MAMA, questions of breast feeding, MADRS-S, MPAS and ISI. Blood sample collection on the following: prolactin, inflammatory parameters, full blood count and a sample for measurement of sertraline plasma concentrations.

The blinded phase of the study is now terminated and the treatment is revealed for the women and the psychiatrist. Note that all study staff except for the psychiatrist and the psychiatry nurse will remain blinded through all forthcoming visits and analyses. Women on active treatment with sertraline will be recommended to continue treatment. Women treated with placebo and showing signs of clinical depression will be recommended treatment with sertraline according to clinical routine until one year after delivery.

Patients' self-assessment questionnaires should have been filled in via internet before the visit: MADRS-S, EPDS, EQ-5D, ISI, MAMA, MPAS adverse events and questions about breastfeeding. Blood sample collection for concentration of sertraline.

The midwife makes an 'Accountability log' on drugs returned to site and controls for adverse events.

#### **6.10 Visit 7 (week + 30 +/- 2 weeks) '3 months after Delivery'**

Visit at site. Patients will visit the site for consultation for clinical assessment by the research nurse in Psychiatry including safety and effect assessments, CGI-S and SCID-I (only depression module) at the same time as visit 3 for the child (paragraph 6.13).

## **PART II: THE CHILD BORN TO A MOTHER IN THE STUDY**

#### **6.11 Visit 1 (+24 hours to 48h after delivery) Study paediatrician**

The women are informed that they will be observed in the hospital for at least 48 hours after the delivery.

Clinical and neurological examination by the study paediatrician according to the standardized protocol Hammersmith Neonatal Neurological Examination (HNNE) will be performed once within 48h of age. Buccal swabs are used for sampling of DNA for assessment of epigenetic, pharmacogenetic and telomere biology variables.

The following blood samples will be collected: Capillary plasma glucose levels on infant before the 2<sup>nd</sup> meal (5-10 µl).

Neonatal abstinence score (NAS) will be evaluated every 8 hours by the midwife/nurse at the maternity ward between 24 to 48 hours of age and longer if necessary.

#### **6.12 Visit 2 (+ 48 hours after delivery) Study paediatrician**

The following blood samples will be collected: for plasma glucose (5-10 µl) and for measurement of plasma concentrations of sertraline (500µl). The blood sample will be collected at the same time as the routine neonatal screening.

EudraCT No: 2013-004444-31

Date: 2014-5-11 rev 20160307, rev 20161121, rev 20180406

Status: FINAL

Version: 5.0, 5.1A, 5.2, 5.3

19(27)

### **6.13 Visit 3 (child at three months of age) Study paediatrician and 'Nurse follow-up'= Visit 7 for the women**

Clinical and neurological examination by study paediatrician with Hammersmith infant Neurological Examination (HINE). Data on body measurements are extracted from the Child Health Clinics electronic documentations. Buccal swabs are used to sample DNA for assessment of epigenetic and telomere biology variables.

Parental attachment, maternal health and questionnaires about psychiatric status of the partner and breast feeding is recorded in the questionnaires completed online, described under visit 7 in the maternal part of the study (paragraph 6.10).

### **6.14 Visit 4 (child at two years of age) to child psychologist and study paediatrician**

A child psychologist will perform the evaluation with Bayley Scales of Infant and Toddler Development®, Third Edition (Bayley-III®). The study paediatrician will use HINE for evaluation. Buccal swabs are used for sampling of buccal tissues containing DNA for assessment of epigenetic and telomere biology variables will be taken. The women will complete the following questionnaires: MAMA, MPAS, Maternal psychosocial status, SDQ, MADRS-S. Furthermore growth charts from child health clinics will be collected from the electronic medical record system.

The visit at 2 years of age is the last visit in this part of the study. We are planning a follow up of the children at 5.5-6 years of age with evaluation by a child psychologist and questionnaires on development and behaviour. A detailed study protocol for this will be developed when this third part of the study will take place.

## **7 WITHDRAWAL OF SUBJECTS**

### **7.1 Criteria for Withdrawal**

Subjects are free to discontinue their participation in the study at any time and for whatever reason without explanations. If possible, the reason for withdrawal of consent should be documented. The subjects may be discontinued from study medication at any time at the discretion of the investigator(-s). The reason to discontinue subjects from study medication (other than exclusion criteria) could be:

- Subject is lost to follow up
- Severe protocol violation
- Severe adverse events (SAE) e.g. patients that according to psychiatric assessment have high suicidal risk, allergic reactions.
- Intercurrent illness violating the conditions of the study.

## **8 TREATMENT**

### **8.1 Description of Investigational Medicinal Products (IMP)**

The investigational medicinal product (IMP) is a capsule containing either sertraline hydrochloride or placebo manufactured by APL (Apoteket Produktion & Laboratorier AB, Stockholm, Sweden). The capsules of active drug are made of hard gelatine and filled with sertraline hydrochloride corresponding EudraCT No: 2013-004444-31

Date: 2014-5-11 rev 20160307, rev 20161121, rev 20180406

Status: FINAL

Version: 5.0, 5.1A, 5.2, 5.3

20(27)

to 25mg sertraline using Zoloft® (25mg sertraline film-coated tablets, Pfizer Ltd, New York) and with a microcrystalline cellulose filler. The placebo capsules are made of identical microcrystalline cellulose filler embedded into an identical hard gelatine capsule. The IMP is delivered by the producer in sealed HD polyethylene containers, labelled according to a randomisation list. Patients are randomised to treatment by Karolinska Trial Alliance (KTA) with block randomisation. The size of these blocks is blinded for the investigators.

Treatment with sertraline/placebo starts with titration of 25 mg (1 tablet) daily for 5 days, and increases to 50 mg daily (2 tablets) until first treatment evaluation. After the first treatment evaluation the dose can be increased to 100 mg daily (4 tablets) with titration of 75mg for 5 days. After the second treatment evaluation the dose can be increased further to a maximum 150 mg/day (without titration). Any change of dose of IMP will only be performed after the psychiatrist's evaluation of the patient's safety and effect. Patients are not allowed to titrate the dose by themselves, not even after telephone consultation with the psychiatrist. The IMP can be administered either with or without food. If the patient notices signs of deterioration she is instructed to contact the research nurse by phone or in acute cases the psychiatric emergency department. The research nurse can then contact the psychiatrist for discussion, or in acute cases, she can directly contact the psychiatric emergency department. If necessary, the psychiatrist can call the patient and either refer her for acute psychiatric assessment or book the patient in for an extra visit.

## 8.2 Treatment Assignment

Patients will be randomly allocated to the next consecutive patient number when the investigator has verified that the patient fulfils the eligibility criteria.

## 8.3 Blinding and Code Breaking

This is a double-blind trial. Blinding will be accomplished by ensuring that the active substance and placebo are of identical appearance and packaging. The treatment code will be broken at one month after delivery or earlier for safety reasons judged by the investigator. Coded envelopes and code lists will be locked in a cupboard at the Pharmacy at Karolinska University Hospital, Huddinge. If a patient pre-terminates the study the date and the reason for withdrawal is documented in the CRF. The same procedure will take place at additional study sites. There is also an external Data Monitoring and Safety Committee (DMC) who can in due cases break the treatment code. The DMC will have senior expertise in clinical pharmacology (paediatric focus), neonatology/paediatrics, psychiatry and biostatistics.

# 9 ALLOCATION TO TREATMENT

The patients receive verbal and written instructions on how to use and store the IMP.

## 9.1 Prior and Concomitant Medication

Relevant medication history (prior medications) as judged by the Investigator will be documented in the CRF. At each visit the investigator (or his/hers designee) will ask for concomitant medication. During the study period concomitant use of the following drugs may be needed in either study group: Regular use of promethazine or propiomazine. Oxazepam in case of severe anxiety on rare occasions. These concomitant medications will be reported.

EudraCT No: 2013-004444-31

Date: 2014-5-11 rev 20160307, rev 20161121, rev 20180406

Status: FINAL

Version: 5.0, 5.1A, 5.2, 5.3

21(27)

1. ASA
2. NSAID
3. Oxazepam/Promethazine
4. Propiomazine

### **9.2 Compliance to Treatment & Product Accountability**

All patients should administer the IMP as instructed. The research nurse will make accountability checks and document any discrepancies found. The monitor will also make an accountability check and document any compliance issues. At the end of the ICBT, the ICBT-therapist will also make a short, structured rating of the participant's compliance to the ICBT manual.

### **9.3 Continuation of Treatment**

All patients should administer the IMP once daily from the randomisation visit until visit 6 (4 weeks after delivery). All patients in the active treatment arm will be offered continuation of the treatment as in routine care.

## **10 ASSESSMENT OF EFFICACY AND SAFETY**

### **10.1 Clinical Safety Assessments**

To evaluate the efficacy and safety of combined treatment with ICBT and sertraline vs. ICBT alone for antenatal moderate depression

#### **Evaluation of efficacy:**

- a) Effect size of the add-on effect of sertraline measured in difference in self-report of depressive symptoms (MADRS-S) at 1-12 weeks, at 14 weeks, and at 22 weeks (4 weeks postpartum) of treatment. All self-reported assessment are performed online.
- b) Add-on treatment effect of sertraline measured in rate of remission from depression (measured by diagnostic psychiatric interview MADRS at 4 weeks, 14 weeks and 22 weeks (4 weeks postpartum) of treatment.
- c) Effect size of treatment effect of ICBT calculated as difference of self-report of symptom (MADRS-S) pre- and post-treatment.
- d) Risk of suicidality measured as change from baseline (measured by MADRS-S and MADRS) and as occurrence of exclusion during the study due to psychiatric assessment of high suicidal risk

#### **Evaluation of safety:**

The psychologist and the psychiatrist work in collaboration to ensure that patients are ensured optimal psychiatric care and safety. The psychologist supervises and monitors each patient individually on a weekly basis online, for an early detection of symptoms that indicate 'disease progress' /'disease improvement' and any symptoms that require further expertise and support by a psychiatrist. The psychiatrist has the main responsibility to clinically decide about inclusion of patients and to monitor the efficacy and safety of treatment with help of psychiatric nurse. The psychiatrist recommends the PI if a patient needs to withdraw from the study due to increased level of depression or other psychiatric illness.

EudraCT No: 2013-004444-31

Date: 2014-5-11 rev 20160307, rev 20161121, rev 20180406

Status: FINAL

Version: 5.0, 5.1A, 5.2, 5.3

22(27)

All visits to the study psychiatrist and interaction with the Unit for Internet Psychiatry are documented in health care journals according to routine and practice in the psychiatry unit at Stockholm Healthcare Region.

## 10.2 Laboratory Safety Assessments

Blood analyses for control of thyroid function (TSH, T3 and T4) and Haemoglobin (Hb) will be evaluated as done in clinical practice and in case of values above or below reference values in pregnant women the patients will be contacted and necessary action will be undertaken.

Other blood tests, e.g. samples for plasma concentrations of sertraline, other endocrinological tests (apart from thyroid hormones) and DNA from whole blood for analyses of genetic variants controlling metabolism and drug transport will be banked and analysed when all study samples are collected. Cell separation will be performed within 6 hours for epigenetic and telomere biology variables testing. All blood samples from the infants in the umbilical cord will be analysed later, cell separation will be done within 6 hours. The capillary blood glucose will be measured immediately and if below reference values measurements will be taken to restore normal levels.

## 11 PROCEEDINGS FOR ADVERSE EVENTS

### 11.1 Definition of Adverse Events

The drug sertraline used in this study is one of the drugs of choice according to the treatment recommendations from the Drug and Therapeutics Committee at Stockholm County Board (Läkemedelskommittén, SLL Kloka Listan: [www.janusinfo.se/Beslutsstod/Kloka-Listan/Kloka-listan-2014](http://www.janusinfo.se/Beslutsstod/Kloka-Listan/Kloka-listan-2014)) so the adverse effects and adverse reactions are known to the study psychiatrists.

In the study, the definitions of adverse events (AE) serious adverse events (SAE) and suspected unexpected Serious Adverse Reactions (SUSAR) relate to any study patient regardless of if this patient belongs to the group receiving sertraline and I-CBT or placebo and I-CBT. The adverse events can also be related to the I-CBT.

An adverse event (AE) is defined as an event that is any undesirable experience associated with the use of the medical product in this case sertraline or placebo.

A serious adverse event (SAE) is defined as death, a life-threatening event, hospitalization (initial or prolonged), disability, permanent damage or congenital anomaly/birth defect in the infant. **Any suspected SAE should be reported in a special form and sent within 24 hours by e-mail to the sponsor.**

**A Suspected Unexpected Serious Adverse Reaction (SUSAR)** is defined as an untoward and unintended response to a study drug, which is not listed in the applicable SPC, and meets one of the following serious criteria: results in death, is life-threatening, requires hospitalisation or prolongation of an existing hospitalisation, results in persistent or significant disability or incapacity, or is a congenital anomaly or birth defect.

Adverse events (AE) or serious adverse events (SAE) are any undesirable experience reported by the patient, reported in interviews, questionnaires, or results from laboratory tests that come to the knowledge of the investigator, regardless of the relation to the drug/placebo used for treatment in the study. The sponsor will report all SUSARs to all Principal Investigators involved in trials with the IMP.

EudraCT No: 2013-004444-31

Date: 2014-5-11 rev 20160307, rev 20161121, rev 20180406

Status: FINAL

Version: 5.0, 5.1A, 5.2, 5.3

23(27)

There is an additional data monitoring and safety committee (DMC) consisting of independent senior researchers from Karolinska Institutet, Umeå University and Lund University (See section 8.3). This committee can at any time if there is any suspicion of a serious adverse event break the code and undertake necessary precautions.

It is well documented that the ICBT may cause stress as the participants sometimes feel they do not have time to fulfil the ICBT. Unexpected reactions on ICBT will also be reported according to procedures used routinely in the Department for Internet Psychiatry (IPSY) at Psychiatry Southwest, Stockholm Healthcare Region. These reports of adverse events will be reported further to the study physician, who will report to the sponsor and in due cases report to Karolinska Trial Alliance (KTA) for further reports to EuraVigilance.

The sponsor will each year of the study submit a safety report to The Swedish Medical Products Agency.

## 12 DATA MANAGEMENT

All data will be collected in a database. Each subject in the study will have a study number to identify the subject. The code will be kept on paper in a locked cupboard.

### 12.1 Statistical Analysis

The main analyses will be done according to the intention to treat principle. Data will also be analysed per protocol to achieve an efficacy analysis. The primary endpoint, results of BSID III<sup>®</sup> will be analysed with Student's T-test. Multiple imputation will be used for missing data. The variables used in the imputation mode will be smoking, ADHD, education level and parity. All patients' demographic data will be analysed by descriptive (mean, median and range) statistics. Fisher's exact test will be used for dichotomous variables such as infant sex, mother's smoking and optimal/suboptimal neurology at Hammersmith neonatal neurological examination. Throughout the analysis, the mean and standard deviation will be calculated for all continuous data using Student's T-test. The non-normally distributed continuous variables, including the results from Hammersmith neurological scales will be analysed with the Mann-Whitney U-test and the results of MADRS by Cohen's effect size. For categorical variables, absolute frequency, percentages and/or proportions are calculated and Fishers exact test will be used.

The treatment effect analysis of the add-on effect of sertraline to ICBT will be a multilevel model for longitudinal data with timepoints nested within individuals (a.k.a. Growth Curve Modelling) using MADRS-S scores from baseline, each of the 12 weeks in treatment, and post treatment. A p-value of <0.05 will be considered significant. Sub group analyses will be performed for several subgroups such as prematurity, smokers, ADHD, parity, maternal age and education level. Spearman's correlation test will be used to test the correlation between maternal and infant plasma sertraline concentration.

### 12.2 Determination of Sample Size

#### For the primary objective

The sample size is calculated to be able to detect a difference of 7 points (SD 0.5) points with a power of 80% ( $\alpha$ : 0, 05) in the results when testing with BSID-III<sup>®</sup> at 2 years of age. It is estimated to give a clinical significant difference. This means that the study will require a sample of 73 participating children in each

EudraCT No: 2013-004444-31

Date: 2014-5-11 rev 20160307, rev 20161121, rev 20180406

Status: FINAL

Version: 5.0, 5.1A, 5.2, 5.3

24(27)



group. We assume a superiority effect when exposed to sertraline in utero (effect on BSID). If no difference between groups is detected various non-inferiority analyses will be pursued.

#### **For the secondary objective**

The additional effect of sertraline as compared to standard ICBT plus placebo will be evaluated by comparing effects on MADRS-S scores between the groups. Data on the total effect of CBT combined with antidepressant therapy is limited. The standardized effect of psychotherapy can be as high as 0.74 when compared to placebo and 0.38 when compared to face-to-face psychotherapy (35). ICBT is largely self-directed even with therapist guidance, which is likely to put a higher demand on the patients in terms of initiative and maintaining the motivation compared to face-to-face-treatment. Therefore, it is likely that the added effect of SSRI will be larger than what has been found in face-to-face CBT, though not as large as when compared to placebo alone. We therefore hypothesize a standardized effect size of  $d=0.50$  (Cohen). This is also the minimal added effect that we would consider clinically relevant considering the possibility of negative side effects and the documented efficacy of ICBT alone.(34) A sample size calculation with standardized effect equal to 0.5 (Cohen),  $\alpha$ -value=0.05 and power 80% requires 64 persons in each group. Therefore to recruit 100 patients in each group will fulfil the power calculation.

#### **12.3 Analysis of risk –benefit**

The main outcome of this study is to evaluate the cognitive development in the children exposed to sertraline in fetal life. Usually these studies are performed on cohorts. In the present study we have the opportunity to compare the outcome in two groups of children, whose mothers have received the same treatment except for the treatment with the active drug (sertraline). For the second endpoint, the level of maternal depression, there is a possibility to evaluate the effect of the add-on treatment with sertraline to the ICBT. Sertraline is recommended for treatment of moderate depression, and is used in clinical practices. The risk for the women or their children is not increased compared to the regular treatment today. On the contrary, the women will have a more thorough follow-up of their treatment than in clinical practice.

#### **12.4 Control of quality and guarantee of quality**

There will an independent monitor from Karolinska Trial Alliance (KTA), Karolinska University Hospital, who will continuously control that the researchers follow the study protocol. The staff at KTA has well documented knowledge and formal education in Good Clinical Practice GCP.

#### **12.5 Insurance of patients**

All patients included in the study are included in The Patient Claims Panel Insurance for patients in Sweden. ([www.patientskadenamnden.se/system/in-english/](http://www.patientskadenamnden.se/system/in-english/)).

EudraCT No: 2013-004444-31

Date: 2014-5-11 rev 20160307, rev 20161121, rev 20180406

Status: FINAL

Version: 5.0, 5.1A, 5.2, 5.3

25(27)

## REFERENCES

1. Josefsson, A., et al., *Prevalence of depressive symptoms in late pregnancy and postpartum*. Acta Obstet Gynecol Scand, 2001. **80**(3): p. 251-5.
2. Stewart, D.E., *Clinical practice. Depression during pregnancy*. N Engl J Med, 2011. **365**(17): p. 1605-11.
3. Gavin, N.I., et al., *Perinatal depression: a systematic review of prevalence and incidence*. Obstet Gynecol, 2005. **106**(5 Pt 1): p. 1071-83.
4. Milgrom, J., et al., *Antenatal risk factors for postnatal depression: a large prospective study*. J Affect Disord, 2008. **108**(1-2): p. 147-57.
5. NICE. *Antenatal and postnatal mental health: the NICE guideline on clinical management and service guidance*. London: National Institute for Health and Clinical Excellence. <https://www.nice.org.uk/guidance/cg192>. 2014 [cited 2018 06/06].
6. Socialstyrelsen. *Nationella riktlinjer för vård vid depression och ångestsyndrom: stöd för styrning och ledning (In Swedish, national guidelines for care of depression and anxiety syndromes)*. <http://www.socialstyrelsen.se/nationellariktlinjerfordepressionochangestsyndrom>. 2017 [cited 2018 06/06].
7. Grote, N.K., et al., *A meta-analysis of depression during pregnancy and the risk of preterm birth, low birth weight, and intrauterine growth restriction*. Arch Gen Psychiatry, 2010. **67**(10): p. 1012-24.
8. Forsell, E., et al., *Internet delivered cognitive behavior therapy for antenatal depression: A randomised controlled trial*. J Affect Disord, 2017. **221**: p. 56-64.
9. Cuijpers, P., et al., *Psychotherapy for depression in adults: a meta-analysis of comparative outcome studies*. J Consult Clin Psychol, 2008. **76**(6): p. 909-22.
10. Andrews, G., et al., *Computer therapy for the anxiety and depressive disorders is effective, acceptable and practical health care: a meta-analysis*. PLoS One, 2010. **5**(10): p. e13196.
11. Cuijpers, P., et al., *Is guided self-help as effective as face-to-face psychotherapy for depression and anxiety disorders? A systematic review and meta-analysis of comparative outcome studies*. Psychol Med, 2010. **40**(12): p. 1943-57.
12. Hedman, E., et al., *Effectiveness of Internet-based cognitive behaviour therapy for depression in routine psychiatric care*. J Affect Disord, 2014. **155**: p. 49-58.
13. Andersson, G., et al., *Development of a New Approach to Guided Self-Help via the Internet: The Swedish Experience*. Journal of Technology in Human Services, 2008. **26**(2-4): p. 161-181.
14. Bonnin, A. and P. Levitt, *Fetal, maternal, and placental sources of serotonin and new implications for developmental programming of the brain*. Neuroscience, 2011. **197**: p. 1-7.
15. Oberlander, T.F., J.A. Gingrich, and M.S. Ansorge, *Sustained neurobehavioral effects of exposure to SSRI antidepressants during development: molecular to clinical evidence*. Clin Pharmacol Ther, 2009. **86**(6): p. 672-7.
16. Casper, R.C., et al., *Length of prenatal exposure to selective serotonin reuptake inhibitor (SSRI) antidepressants: effects on neonatal adaptation and psychomotor development*. Psychopharmacology (Berl), 2011. **217**(2): p. 211-9.
17. Field, T., M. Diego, and M. Hernandez-Reif, *Prenatal depression effects on the fetus and newborn: a review*. Infant Behav Dev, 2006. **29**(3): p. 445-55.
18. Moses-Kolko, E.L., et al., *Neonatal signs after late in utero exposure to serotonin reuptake inhibitors: literature review and implications for clinical applications*. JAMA, 2005. **293**(19): p. 2372-83.
19. Reis, M. and B. Kallen, *Delivery outcome after maternal use of antidepressant drugs in pregnancy: an update using Swedish data*. Psychol Med, 2010. **40**(10): p. 1723-33.

EudraCT No: 2013-004444-31

Date: 2014-5-11 rev 20160307, rev 20161121, rev 20180406

Status: FINAL

Version: 5.0, 5.1A, 5.2, 5.3

26(27)

20. Warburton, W., C. Hertzman, and T.F. Oberlander, *A register study of the impact of stopping third trimester selective serotonin reuptake inhibitor exposure on neonatal health*. *Acta Psychiatr Scand*, 2010. **121**(6): p. 471-9.
21. DeVane, C.L., H.L. Liston, and J.S. Markowitz, *Clinical pharmacokinetics of sertraline*. *Clin Pharmacokinet*, 2002. **41**(15): p. 1247-66.
22. Shalev, I., et al., *Stress and telomere biology: a lifespan perspective*. *Psychoneuroendocrinology*, 2013. **38**(9): p. 1835-42.
23. Entringer, S., et al., *Maternal psychosocial stress during pregnancy is associated with newborn leukocyte telomere length*. *Am J Obstet Gynecol*, 2013. **208**(2): p. 134 e1-7.
24. Price, L.H., et al., *Telomeres and early-life stress: an overview*. *Biol Psychiatry*, 2013. **73**(1): p. 15-23.
25. Menke, A., T. Klengel, and E.B. Binder, *Epigenetics, depression and antidepressant treatment*. *Curr Pharm Des*, 2012. **18**(36): p. 5879-89.
26. Gentile, S. and M. Galbally, *Prenatal exposure to antidepressant medications and neurodevelopmental outcomes: a systematic review*. *J Affect Disord*, 2011. **128**(1-2): p. 1-9.
27. Hanley, G.E., U. Brain, and T.F. Oberlander, *Infant developmental outcomes following prenatal exposure to antidepressants, and maternal depressed mood and positive affect*. *Early Hum Dev*, 2013. **89**(8): p. 519-24.
28. Klinger, G., et al., *Long-term outcome following selective serotonin reuptake inhibitor induced neonatal abstinence syndrome*. *J Perinatol*, 2011. **31**(9): p. 615-20.
29. Nulman, I., et al., *Neurodevelopment of children exposed in utero to antidepressant drugs*. *N Engl J Med*, 1997. **336**(4): p. 258-62.
30. Pawluski, J.L., *Perinatal selective serotonin reuptake inhibitor exposure: impact on brain development and neural plasticity*. *Neuroendocrinology*, 2012. **95**(1): p. 39-46.
31. Rai, D., et al., *Parental depression, maternal antidepressant use during pregnancy, and risk of autism spectrum disorders: population based case-control study*. *BMJ*, 2013. **346**: p. f2059.
32. Rubertsson, C., et al., *The Swedish validation of Edinburgh Postnatal Depression Scale (EPDS) during pregnancy*. *Nord J Psychiatry*, 2011. **65**(6): p. 414-8.

EudraCT No: 2013-004444-31

Date: 2014-5-11 rev 20160307, rev 20161121, rev 20180406

Status: FINAL

Version: 5.0, 5.1A, 5.2, 5.3

27(27)
